# Supplementary material for: Insights into Intra-Tumoral Heterogeneity: Transcriptional Profiling of Chemoresistant MPM Cell Subpopulations Reveals Involvement of NFkB and DNA Repair Pathways and Contributes a Prognostic Signature
Source: MDPI journal article supplement (doi:10.3390/ijms222112071), 2021-11-08
Supplement: s1 [file s1]

**Table S1. Differentially expressed genes due to each effect.** Table S1 below shows the number of genes with a p value below various thresholds, as well as the number of genes expected by chance at each threshold, for each effect. The left part of both tables summarizes the number of genes with a moderated p value below various thresholds; the right part of both tables below summarizes the FDR q values for the same comparisons

| p threshold | expected | ALDH | Treatment | ALDH:treatment |
|-------------|----------|------|-----------|----------------|
| 0.05        | 1189     | 6428 | 6223      | 2841           |
| 0.01        | 238      | 3684 | 3552      | 939            |
| 0.005       | 119      | 2839 | 2812      | 615            |
| 0.001       | 24       | 1474 | 1507      | 199            |

**Table S2.** FDR q values for each effect.

| q threshold | ALDH | treatment | ALDH:treatment |
|-------------|------|-----------|----------------|
| 0.25        | 7552 | 7229      | 924            |
| 0.1         | 4669 | 4401      | 86             |
| 0.05        | 3128 | 3037      | 2              |
| 0.01        | 972  | 1100      | 0              |

**Table S3.** Summary of p and FDR q values between the butein- and ctrl-treated samples within each ALDH group. The left part of both tables summarizes the number of genes with a moderated p value below various thresholds; the right part of both tables below summarizes the FDR q values for the same comparisons

| butein vs ctrl |          |                     |                        |             |                     |                        |
|----------------|----------|---------------------|------------------------|-------------|---------------------|------------------------|
| p threshold    | expected | ALDH <sup>low</sup> | ALDH <sup>bright</sup> | q threshold | ALDH <sup>low</sup> | ALDH <sup>bright</sup> |
| 0.05           | 1189     | 5428                | 4880                   | 0.25        | 6103                | 4989                   |
| 0.01           | 238      | 2472                | 2138                   | 0.1         | 2568                | 1902                   |
| 0.005          | 119      | 1745                | 1501                   | 0.05        | 1191                | 824                    |
| 0.001          | 24       | 704                 | 594                    | 0.01        | 37                  | 0                      |

**Table S4.** Summary of p and FDR q values between the ALDH<sup>bright</sup> and ALDH<sup>low</sup> cells within each treatment group. Moderated t tests: ALDH<sup>bright</sup> vs. ALDH<sup>low</sup>, within each treatment type. The left part of both tables summarizes the number of genes with a moderated p value below various thresholds; the right part of both tables below summarizes the FDR q values for the same comparisons

| ALDH <sup>bright</sup> vs ALDH <sup>low</sup> |          |      |        |             |      |        |
|-----------------------------------------------|----------|------|--------|-------------|------|--------|
| p threshold                                   | expected | ctrl | butein | q threshold | ctrl | butein |
| 0.05                                          | 1189     | 4343 | 6180   | 0.25        | 3959 | 7694   |
| 0.01                                          | 238      | 1740 | 2798   | 0.1         | 1007 | 3294   |
| 0.005                                         | 119      | 1125 | 1931   | 0.05        | 7    | 1455   |
| 0.001                                         | 24       | 362  | 725    | 0.01        | 0    | 0      |

**Table S5.** Summary of mRNA expression data of the eighteen genes identified in this work wghen bulk, matched mesothelial vs mesothelioma specimens were analyzed.
