# Supplementary material for: Insights into Intra-Tumoral Heterogeneity: Transcriptional Profiling of Chemoresistant MPM Cell Subpopulations Reveals Involvement of NFkB and DNA Repair Pathways and Contributes a Prognostic Signature
Source: Int J Mol Sci. 2021 Nov 8;22(21):12071. doi: 10.3390/ijms222112071 (PMC8585077; doi:10.3390/ijms222112071)
Supplement: Supplementary file 1 [file ijms-22-12071-s001.zip]

Archive with 4 entries (4 files):
- Legends to supplementary figures.pdf
- Suppl. Figs.pptx
- Suppl. Tables 1-4.pdf
- Table_S5.xlsx
