# Supplementary material for: Insights into Intra-Tumoral Heterogeneity: Transcriptional Profiling of Chemoresistant MPM Cell Subpopulations Reveals Involvement of NFkB and DNA Repair Pathways and Contributes a Prognostic Signature
Source: Int J Mol Sci. 2021 Nov 8;22(21):12071. doi: 10.3390/ijms222112071 (PMC8585077; doi:10.3390/ijms222112071)
Supplement: Supplementary file 1 [file ijms-22-12071-s001.zip › Table_S5.xlsx]

## Sheet: whole set
					log2 (expression)
Entrez Gene ID	Symbol	Description	GO Term(s)	KEGG Pathway(s)	ALDHlow vehicle 3A	ALDHlow vehicle 3B	ALDHlow STAT3i 4A	ALDHlow STAT3i 4B	ALDHbright vehicle 1A	ALDHbright vehicle 1B	ALDHbright STAT3i 2A	ALDHbright STAT3i 2B
57092	PCNP	PEST proteolytic signal containing nuclear protein	GO:0005515: protein binding, GO:0005634: nucleus, GO:0007049: cell cycle, GO:0016567: protein ubiquitination, GO:0043161: proteasomal ubiquitin-dependent protein catabolic process		9.40591	9.3685	9.64899	9.83078	9.43617	9.45398	9.34678	9.37058
163081	ZNF567	zinc finger protein 567	GO:0003677: DNA binding, GO:0005634: nucleus, GO:0006351: transcription, DNA-dependent, GO:0006355: regulation of transcription, DNA-dependent, GO:0008270: zinc ion binding		5.8853	5.93054	6.29541	6.58314	6.07721	6.08065	5.91839	5.86238
84522	JAGN1	jagunal homolog 1 (Drosophila)	GO:0005789: endoplasmic reticulum membrane, GO:0016021: integral to membrane		7.88976	7.86876	8.15352	8.193	7.99761	7.96124	7.84063	7.87861
7321	UBE2D1	ubiquitin-conjugating enzyme E2D 1	GO:0000075: cell cycle checkpoint, GO:0000209: protein polyubiquitination, GO:0000278: mitotic cell cycle, GO:0004842: ubiquitin-protein ligase activity, GO:0005515: protein binding, GO:0005524: ATP binding, GO:0005654: nucleoplasm, GO:0005737: cytoplasm, GO:0005829: cytosol, GO:0006511: ubiquitin-dependent protein catabolic process, GO:0007094: mitotic cell cycle spindle assembly checkpoint, GO:…	04120: Ubiquitin mediated proteolysis, 04141: Protein processing in endoplasmic reticulum	7.70896	7.66165	8.15276	8.3211	7.94358	7.94302	7.70281	7.63961
79693	YRDC	yrdC domain containing (E. coli)	GO:0005739: mitochondrion, GO:0016020: membrane, GO:0051051: negative regulation of transport		7.23144	7.20531	7.78412	7.82851	7.43306	7.43059	7.34774	7.28244
23657	SLC7A11	solute carrier family 7 (anionic amino acid transporter light chain, xc- system), member 11	GO:0005515: protein binding, GO:0005791: rough endoplasmic reticulum, GO:0005856: cytoskeleton, GO:0005886: plasma membrane, GO:0006811: ion transport, GO:0006865: amino acid transport, GO:0006979: response to oxidative stress, GO:0007420: brain development, GO:0007596: blood coagulation, GO:0009636: response to toxin, GO:0015327: cystine:glutamate antiporter activity, GO:0016021: integral to mem…		8.77363	8.87858	9.56858	9.62676	9.10837	9.19252	8.92865	8.86966
55609	ZNF280C	zinc finger protein 280C	GO:0003677: DNA binding, GO:0005634: nucleus, GO:0006351: transcription, DNA-dependent, GO:0006355: regulation of transcription, DNA-dependent, GO:0008270: zinc ion binding		6.6065	6.68755	7.3453	7.33461	6.89987	6.8746	6.77789	6.59963
9929	JOSD1	Josephin domain containing 1	GO:0006508: proteolysis, GO:0008242: omega peptidase activity		7.4703	7.52251	8.05598	8.10689	7.68695	7.66478	7.58276	7.44116
79135	APOO	apolipoprotein O	GO:0005615: extracellular space, GO:0006869: lipid transport, GO:0016021: integral to membrane, GO:0034361: very-low-density lipoprotein particle, GO:0034362: low-density lipoprotein particle, GO:0034364: high-density lipoprotein particle		5.58753	5.72215	6.10091	6.17145	5.85744	5.78856	5.72217	5.65744
133686	NADKD1	NAD kinase domain containing 1	GO:0003951: NAD+ kinase activity, GO:0005739: mitochondrion		7.66325	7.69135	7.87707	7.9435	7.84733	7.73134	7.67828	7.70237
1121	CHM	choroideremia (Rab escort protein 1)	GO:0001568: blood vessel development, GO:0004663: Rab geranylgeranyltransferase activity, GO:0005096: GTPase activator activity, GO:0005968: Rab-protein geranylgeranyltransferase complex, GO:0006886: intracellular protein transport, GO:0007601: visual perception, GO:0017137: Rab GTPase binding, GO:0018344: protein geranylgeranylation, GO:0050896: response to stimulus		6.82526	6.82514	7.10513	7.14728	6.96054	6.89565	6.91411	6.87873
55248	TMEM206	transmembrane protein 206	GO:0016021: integral to membrane		5.5201	5.4823	5.83381	5.89969	5.71977	5.61034	5.59178	5.591
9482	STX8	syntaxin 8	GO:0005783: endoplasmic reticulum, GO:0005887: integral to plasma membrane, GO:0006810: transport, GO:0031625: ubiquitin protein ligase binding	04130: SNARE interactions in vesicular transport	8.39853	8.43571	8.61287	8.53577	8.50655	8.44914	8.37173	8.39361
54957	TXNL4B	thioredoxin-like 4B	GO:0005681: spliceosomal complex, GO:0006397: mRNA processing, GO:0007067: mitosis, GO:0008380: RNA splicing		6.67887	6.73624	7.21814	7.11701	6.95259	6.7449	6.65396	6.74937
84919	PPP1R15B	protein phosphatase 1, regulatory subunit 15B	GO:0000164: protein phosphatase type 1 complex, GO:0004722: protein serine/threonine phosphatase activity, GO:0006417: regulation of translation, GO:0006983: ER overload response, GO:0042542: response to hydrogen peroxide		8.32339	8.33105	8.67763	8.60747	8.55751	8.47008	8.30278	8.32707
22952	CYP2G1P	cytochrome P450, family 2, subfamily G, polypeptide 1 pseudogene	GO:0009055: electron carrier activity, GO:0016705: oxidoreductase activity, acting on paired donors, with incorporation or reduction of molecular oxygen, GO:0020037: heme binding		3.04202	3.00446	3.32778	3.35292	3.1779	3.04492	2.98594	2.91669
23411	SIRT1	sirtuin 1	GO:0000012: single strand break repair, GO:0000122: negative regulation of transcription from RNA polymerase II promoter, GO:0000122: negative regulation of transcription from RNA polymerase II promoter, GO:0000183: chromatin silencing at rDNA, GO:0000720: pyrimidine dimer repair by nucleotide-excision repair, GO:0000731: DNA synthesis involved in DNA repair, GO:0000790: nuclear chromatin, GO:000…		7.45238	7.44541	7.78661	7.72699	7.60914	7.49246	7.32487	7.28298
55573	CDV3	CDV3 homolog (mouse)	GO:0003674: molecular_function, GO:0005575: cellular_component, GO:0005730: nucleolus, GO:0005737: cytoplasm, GO:0008283: cell proliferation		9.31165	9.33221	9.47805	9.54836	9.44648	9.39269	9.22092	9.33174
84928	TMEM209	transmembrane protein 209	GO:0016021: integral to membrane		7.71556	7.86383	8.09865	8.18501	7.90604	7.89047	7.58563	7.74849
7014	TERF2	telomeric repeat binding factor 2	GO:0000723: telomere maintenance, GO:0000723: telomere maintenance, GO:0000781: chromosome, telomeric region, GO:0000783: nuclear telomere cap complex, GO:0001309: age-dependent telomere shortening, GO:0001673: male germ cell nucleus, GO:0001701: in utero embryonic development, GO:0003691: double-stranded telomeric DNA binding, GO:0005515: protein binding, GO:0005634: nucleus, GO:0005654: nucleop…		7.27804	7.41647	7.59602	7.59482	7.52337	7.57411	7.45294	7.39715
100996637	LOC100996637	uncharacterized LOC100996637			2.83314	3.18494	3.69621	3.66421	3.41462	3.30608	3.11063	3.04202
58533	SNX6	sorting nexin 6	GO:0005515: protein binding, GO:0005622: intracellular, GO:0005622: intracellular, GO:0005634: nucleus, GO:0005737: cytoplasm, GO:0006886: intracellular protein transport, GO:0006886: intracellular protein transport, GO:0007154: cell communication, GO:0007175: negative regulation of epidermal growth factor-activated receptor activity, GO:0030512: negative regulation of transforming growth factor …		9.19502	9.26875	9.38274	9.32175	9.34417	9.34067	9.22289	9.21513
51430	SUCO	SUN domain containing ossification factor	GO:0001503: ossification, GO:0005791: rough endoplasmic reticulum, GO:0007275: multicellular organismal development, GO:0016020: membrane, GO:0016021: integral to membrane, GO:0030867: rough endoplasmic reticulum membrane, GO:0032967: positive regulation of collagen biosynthetic process, GO:0045669: positive regulation of osteoblast differentiation, GO:0046850: regulation of bone remodeling		7.83813	7.99202	8.24035	8.20349	8.06612	8.16648	7.89246	7.89004
904	CCNT1	cyclin T1	GO:0000079: regulation of cyclin-dependent protein kinase activity, GO:0003677: DNA binding, GO:0003682: chromatin binding, GO:0005515: protein binding, GO:0005634: nucleus, GO:0005654: nucleoplasm, GO:0006355: regulation of transcription, DNA-dependent, GO:0006366: transcription from RNA polymerase II promoter, GO:0006368: transcription elongation from RNA polymerase II promoter, GO:0006468: pro…		7.184	7.28975	7.39153	7.42066	7.41259	7.41155	7.21767	7.24893
9699	RIMS2	regulating synaptic membrane exocytosis 2	GO:0005515: protein binding, GO:0005622: intracellular, GO:0005886: plasma membrane, GO:0006886: intracellular protein transport, GO:0017137: Rab GTPase binding, GO:0030054: cell junction, GO:0042734: presynaptic membrane, GO:0046872: metal ion binding		2.06768	1.92228	2.20845	2.27456	2.24662	2.16527	1.98094	1.9945
55124	PIWIL2	piwi-like 2 (Drosophila)	GO:0000966: RNA 5'-end processing, GO:0003729: mRNA binding, GO:0005737: cytoplasm, GO:0005844: polysome, GO:0007128: meiotic prophase I, GO:0007275: multicellular organismal development, GO:0007283: spermatogenesis, GO:0030718: germ-line stem cell maintenance, GO:0031047: gene silencing by RNA, GO:0033391: chromatoid body, GO:0034584: piRNA binding, GO:0034584: piRNA binding, GO:0034587: piRNA m…	04320: Dorso-ventral axis formation	5.68893	5.57748	5.86387	5.92457	5.83052	5.77946	5.6331	5.57857
9706	ULK2	unc-51-like kinase 2 (C. elegans)	GO:0004674: protein serine/threonine kinase activity, GO:0005515: protein binding, GO:0005524: ATP binding, GO:0006914: autophagy, GO:0007165: signal transduction, GO:0007409: axonogenesis, GO:0010506: regulation of autophagy, GO:0030659: cytoplasmic vesicle membrane, GO:0034045: pre-autophagosomal structure membrane, GO:0042594: response to starvation, GO:0046777: protein autophosphorylation	04140: Regulation of autophagy, 04150: mTOR signaling pathway	6.84208	6.74014	6.94808	6.90775	6.92094	6.90652	6.70133	6.75926
400591	C17orf102	chromosome 17 open reading frame 102			1.98504	1.72108	2.25204	2.19986	2.17614	2.1766	1.84865	1.84865
1143	CHRNB4	cholinergic receptor, nicotinic, beta 4 (neuronal)	GO:0001508: regulation of action potential, GO:0004889: acetylcholine-activated cation-selective channel activity, GO:0005886: plasma membrane, GO:0005887: integral to plasma membrane, GO:0005892: acetylcholine-gated channel complex, GO:0005892: acetylcholine-gated channel complex, GO:0006811: ion transport, GO:0006939: smooth muscle contraction, GO:0006940: regulation of smooth muscle contractio…	04080: Neuroactive ligand-receptor interaction	5.30091	5.10744	5.6722	5.74096	5.3765	5.54424	5.18278	5.16891
284615	ANKRD34A	ankyrin repeat domain 34A	GO:0005737: cytoplasm		3.49965	3.46903	3.79826	3.8805	3.62407	3.78174	3.54535	3.51671
9865	TRIL	TLR4 interactor with leucine-rich repeats	GO:0001530: lipopolysaccharide binding, GO:0002718: regulation of cytokine production involved in immune response, GO:0006954: inflammatory response, GO:0034142: toll-like receptor 4 signaling pathway, GO:0045087: innate immune response, GO:0046696: lipopolysaccharide receptor complex		2.41778	2.38477	2.75732	2.75168	2.53737	2.71621	2.52625	2.42989
26511	CHIC2	cysteine-rich hydrophobic domain 2	GO:0003674: molecular_function, GO:0005515: protein binding, GO:0005575: cellular_component, GO:0005798: Golgi-associated vesicle, GO:0005886: plasma membrane, GO:0008150: biological_process		6.30032	6.49772	7.12755	7.16961	6.98945	6.97696	6.48433	6.63505
10623	POLR3C	polymerase (RNA) III (DNA directed) polypeptide C (62kD)	GO:0003677: DNA binding, GO:0003899: DNA-directed RNA polymerase activity, GO:0005634: nucleus, GO:0005654: nucleoplasm, GO:0005666: DNA-directed RNA polymerase III complex, GO:0006359: regulation of transcription from RNA polymerase III promoter, GO:0006383: transcription from RNA polymerase III promoter, GO:0006385: transcription elongation from RNA polymerase III promoter, GO:0006386: terminat…	00230: Purine metabolism, 00240: Pyrimidine metabolism, 01100: Metabolic pathways, 03020: RNA polymerase, 04623: Cytosolic DNA-sensing pathway	7.99906	8.01971	8.32052	8.34053	8.21075	8.17414	8.05495	8.15642
2297	FOXD1	forkhead box D1	GO:0001755: neural crest cell migration, GO:0003677: DNA binding, GO:0003690: double-stranded DNA binding, GO:0003700: sequence-specific DNA binding transcription factor activity, GO:0003705: RNA polymerase II distal enhancer sequence-specific DNA binding transcription factor activity, GO:0005634: nucleus, GO:0005667: transcription factor complex, GO:0006355: regulation of transcription, DNA-depe…		7.8656	7.75339	8.08096	8.11679	8.12082	8.0559	7.91655	7.93335
1791	DNTT	deoxynucleotidyltransferase, terminal	GO:0003677: DNA binding, GO:0003887: DNA-directed DNA polymerase activity, GO:0003912: DNA nucleotidylexotransferase activity, GO:0005634: nucleus, GO:0005737: cytoplasm, GO:0006304: DNA modification, GO:0046872: metal ion binding	03450: Non-homologous end-joining, 04640: Hematopoietic cell lineage	2.55024	2.4587	2.77241	2.76683	2.74206	2.66739	2.61368	2.66346
9693	RAPGEF2	Rap guanine nucleotide exchange factor (GEF) 2	GO:0000165: MAPK cascade, GO:0004871: signal transducer activity, GO:0005509: calcium ion binding, GO:0005622: intracellular, GO:0005887: integral to plasma membrane, GO:0007264: small GTPase mediated signal transduction, GO:0016020: membrane, GO:0017034: Rap guanyl-nucleotide exchange factor activity, GO:0019933: cAMP-mediated signaling, GO:0019992: diacylglycerol binding, GO:0032854: positive r…	04010: MAPK signaling pathway	7.11581	6.95359	7.42336	7.37819	7.33531	7.24518	7.16705	7.1484
23300	ATMIN	ATM interactor	GO:0005634: nucleus, GO:0006974: response to DNA damage stimulus, GO:0008270: zinc ion binding, GO:0045502: dynein binding, GO:0045893: positive regulation of transcription, DNA-dependent		8.45758	8.51482	8.55062	8.58135	8.52055	8.4912	8.31142	8.29495
56103	PCDHGB2	protocadherin gamma subfamily B, 2	GO:0005509: calcium ion binding, GO:0005886: plasma membrane, GO:0007156: homophilic cell adhesion, GO:0016021: integral to membrane		3.55909	3.7177	3.76674	3.87541	3.66578	3.61976	3.11336	3.01094
3725	JUN	jun proto-oncogene	GO:0000228: nuclear chromosome, GO:0000980: RNA polymerase II distal enhancer sequence-specific DNA binding, GO:0001102: RNA polymerase II activating transcription factor binding, GO:0001190: RNA polymerase II transcription factor binding transcription factor activity involved in positive regulation of transcription, GO:0001525: angiogenesis, GO:0001774: microglial cell activation, GO:0001836: re…	04010: MAPK signaling pathway, 04012: ErbB signaling pathway, 04310: Wnt signaling pathway, 04380: Osteoclast differentiation, 04510: Focal adhesion, 04620: Toll-like receptor signaling pathway, 04660: T cell receptor signaling pathway, 04662: B cell receptor signaling pathway, 04722: Neurotrophin signaling pathway, 04912: GnRH signaling pathway, 05120: Epithelial cell signaling in Helicobacter p…	9.47173	9.55248	9.6537	9.71256	9.4908	9.48788	9.10244	9.12698
5806	PTX3	pentraxin 3, long	GO:0001872: (1->3)-beta-D-glucan binding, GO:0001878: response to yeast, GO:0005576: extracellular region, GO:0006954: inflammatory response, GO:0008228: opsonization, GO:0045429: positive regulation of nitric oxide biosynthetic process, GO:0050766: positive regulation of phagocytosis		6.77781	6.8367	7.33519	7.3492	6.91673	6.91896	5.73397	5.7676
5552	SRGN	serglycin	GO:0000139: Golgi membrane, GO:0002576: platelet degranulation, GO:0005515: protein binding, GO:0005518: collagen binding, GO:0005576: extracellular region, GO:0005615: extracellular space, GO:0005794: Golgi apparatus, GO:0006915: apoptotic process, GO:0007596: blood coagulation, GO:0016485: protein processing, GO:0030168: platelet activation, GO:0030502: negative regulation of bone mineralizatio…		9.34574	9.39548	9.39305	9.49752	9.29901	9.32948	9.05229	9.10818
80254	CEP63	centrosomal protein 63kDa	GO:0000077: DNA damage checkpoint, GO:0000086: G2/M transition of mitotic cell cycle, GO:0000278: mitotic cell cycle, GO:0000922: spindle pole, GO:0005515: protein binding, GO:0005813: centrosome, GO:0005829: cytosol, GO:0007067: mitosis, GO:0042770: signal transduction in response to DNA damage, GO:0051225: spindle assembly, GO:0051301: cell division		6.15623	6.12987	6.14487	6.20428	6.11816	6.10037	5.85687	5.92762
92345	NAF1	nuclear assembly factor 1 homolog (S. cerevisiae)	GO:0003723: RNA binding, GO:0005515: protein binding, GO:0005634: nucleus, GO:0005732: small nucleolar ribonucleoprotein complex, GO:0005737: cytoplasm, GO:0005813: centrosome, GO:0006364: rRNA processing, GO:0030054: cell junction, GO:0030515: snoRNA binding, GO:0031120: snRNA pseudouridine synthesis, GO:0042254: ribosome biogenesis		6.90497	6.82551	6.85858	6.9748	6.8791	6.80429	6.48029	6.37371
4691	NCL	nucleolin	GO:0000166: nucleotide binding, GO:0001525: angiogenesis, GO:0003723: RNA binding, GO:0005515: protein binding, GO:0005634: nucleus, GO:0005654: nucleoplasm, GO:0005730: nucleolus, GO:0005938: cell cortex, GO:0008022: protein C-terminus binding, GO:0030529: ribonucleoprotein complex, GO:0042162: telomeric DNA binding	05130: Pathogenic Escherichia coli infection	10.9255	10.9611	10.9442	10.9079	10.9118	10.8683	10.6848	10.7063
96764	TGS1	trimethylguanosine synthase 1	GO:0000387: spliceosomal snRNP assembly, GO:0001510: RNA methylation, GO:0005634: nucleus, GO:0005654: nucleoplasm, GO:0005737: cytoplasm, GO:0005829: cytosol, GO:0006351: transcription, DNA-dependent, GO:0006355: regulation of transcription, DNA-dependent, GO:0009452: 7-methylguanosine RNA capping, GO:0010467: gene expression, GO:0015030: Cajal body, GO:0016070: RNA metabolic process, GO:0022613…	03013: RNA transport	6.82079	6.85289	6.90892	6.85018	6.83084	6.74469	6.39221	6.38437
26499	PLEK2	pleckstrin 2	GO:0005543: phospholipid binding, GO:0005737: cytoplasm, GO:0005856: cytoskeleton, GO:0030036: actin cytoskeleton organization, GO:0031258: lamellipodium membrane, GO:0035556: intracellular signal transduction		7.90156	7.95136	7.95047	7.98099	7.85291	7.79834	7.29222	7.34556
29080	CCDC59	coiled-coil domain containing 59	GO:0005515: protein binding, GO:0005634: nucleus, GO:0006351: transcription, DNA-dependent, GO:0006355: regulation of transcription, DNA-dependent		7.86883	7.93878	7.88824	7.93481	7.87145	7.82387	7.60405	7.56937
253461	ZBTB38	zinc finger and BTB domain containing 38	GO:0003677: DNA binding, GO:0003700: sequence-specific DNA binding transcription factor activity, GO:0005634: nucleus, GO:0005634: nucleus, GO:0006351: transcription, DNA-dependent, GO:0008270: zinc ion binding, GO:0045944: positive regulation of transcription from RNA polymerase II promoter		9.23604	9.31448	9.24483	9.27137	9.24466	9.19377	8.8876	8.85721
339263	C17orf51	chromosome 17 open reading frame 51			6.77315	6.88285	6.93459	6.91057	6.88449	6.83444	6.29953	6.32976
158431	ZNF782	zinc finger protein 782	GO:0003677: DNA binding, GO:0005634: nucleus, GO:0006351: transcription, DNA-dependent, GO:0006355: regulation of transcription, DNA-dependent, GO:0008270: zinc ion binding		4.19585	4.2464	4.23042	4.19636	4.26799	4.1783	3.90289	3.90289
1452	CSNK1A1	casein kinase 1, alpha 1	GO:0000777: condensed chromosome kinetochore, GO:0004672: protein kinase activity, GO:0004674: protein serine/threonine kinase activity, GO:0005515: protein binding, GO:0005524: ATP binding, GO:0005813: centrosome, GO:0005829: cytosol, GO:0005847: mRNA cleavage and polyadenylation specificity factor complex, GO:0006468: protein phosphorylation, GO:0007067: mitosis, GO:0007165: signal transduction…	04310: Wnt signaling pathway, 04340: Hedgehog signaling pathway	9.85096	9.861	9.93399	10.0209	9.9274	9.979	9.67794	9.75177
387316	VN1R10P	vomeronasal 1 receptor 10 pseudogene			1.24161	1.30834	1.38458	1.38059	1.31017	1.33637	1.07121	1.14615
9317	PTER	phosphotriesterase related	GO:0008270: zinc ion binding, GO:0009056: catabolic process, GO:0016788: hydrolase activity, acting on ester bonds		6.83674	6.98532	7.07518	7.10087	6.94235	7.05266	6.48835	6.60596
6385	SDC4	syndecan 4	GO:0001657: ureteric bud development, GO:0001968: fibronectin binding, GO:0005080: protein kinase C binding, GO:0005515: protein binding, GO:0005576: extracellular region, GO:0005887: integral to plasma membrane, GO:0005925: focal adhesion, GO:0008092: cytoskeletal protein binding, GO:0008150: biological_process, GO:0009986: cell surface, GO:0043034: costamere, GO:0045121: membrane raft, GO:00458…	04512: ECM-receptor interaction, 04514: Cell adhesion molecules (CAMs), 05144: Malaria	9.57814	9.71674	9.82532	9.77244	9.77474	9.79069	9.4148	9.46195
51701	NLK	nemo-like kinase	GO:0000165: MAPK cascade, GO:0000287: magnesium ion binding, GO:0004672: protein kinase activity, GO:0004707: MAP kinase activity, GO:0005515: protein binding, GO:0005524: ATP binding, GO:0005634: nucleus, GO:0005737: cytoplasm, GO:0006351: transcription, DNA-dependent, GO:0006355: regulation of transcription, DNA-dependent, GO:0006468: protein phosphorylation, GO:0006468: protein phosphorylation…	04010: MAPK signaling pathway, 04310: Wnt signaling pathway, 04520: Adherens junction	7.76897	7.71168	7.90161	7.92464	7.88557	8.02326	7.39774	7.30349
81688	C6orf62	chromosome 6 open reading frame 62	GO:0003674: molecular_function, GO:0005622: intracellular, GO:0008150: biological_process		9.86512	9.93975	10.0088	10.0959	9.99821	10.017	9.70113	9.65683
4105	MAGEA6	melanoma antigen family A, 6	GO:0003674: molecular_function, GO:0005515: protein binding, GO:0005575: cellular_component, GO:0008150: biological_process		5.87356	5.99537	6.00357	6.04576	6.08111	6.09642	5.60589	5.5305
5412	UBL3	ubiquitin-like 3	GO:0005622: intracellular, GO:0005886: plasma membrane		8.51571	8.5908	8.64237	8.69489	8.6984	8.67957	7.9976	7.99413
80854	SETD7	SET domain containing (lysine methyltransferase) 7	GO:0002039: p53 binding, GO:0005515: protein binding, GO:0005634: nucleus, GO:0005694: chromosome, GO:0006351: transcription, DNA-dependent, GO:0006355: regulation of transcription, DNA-dependent, GO:0016279: protein-lysine N-methyltransferase activity, GO:0016568: chromatin modification, GO:0018024: histone-lysine N-methyltransferase activity, GO:0018024: histone-lysine N-methyltransferase activ…	00310: Lysine degradation	8.70478	8.75281	8.84743	8.79363	8.62546	8.67416	8.53373	8.50364
4238	MFAP3	microfibrillar-associated protein 3	GO:0005886: plasma membrane, GO:0016021: integral to membrane		7.97793	8.05945	8.10458	8.08192	7.96421	7.9558	7.7892	7.75322
56648	EIF5A2	eukaryotic translation initiation factor 5A2	GO:0003746: translation elongation factor activity, GO:0005515: protein binding, GO:0005643: nuclear pore, GO:0005789: endoplasmic reticulum membrane, GO:0005829: cytosol, GO:0006452: translational frameshifting, GO:0007283: spermatogenesis, GO:0008284: positive regulation of cell proliferation, GO:0008612: peptidyl-lysine modification to hypusine, GO:0010509: polyamine homeostasis, GO:0015031: p…		8.56782	8.61396	8.78693	8.86116	8.46573	8.37856	8.02279	8.05765
64417	C5orf28	chromosome 5 open reading frame 28	GO:0016021: integral to membrane		6.98837	7.19586	7.31596	7.38855	6.93577	6.82997	6.21709	6.29503
92259	MRPS36	mitochondrial ribosomal protein S36	GO:0003735: structural constituent of ribosome, GO:0005739: mitochondrion, GO:0005739: mitochondrion, GO:0005763: mitochondrial small ribosomal subunit, GO:0006412: translation		4.43649	4.52272	4.54997	4.7168	4.33807	4.36048	3.97858	3.83041
9926	LPGAT1	lysophosphatidylglycerol acyltransferase 1	GO:0003674: molecular_function, GO:0005737: cytoplasm, GO:0005789: endoplasmic reticulum membrane, GO:0008150: biological_process, GO:0008654: phospholipid biosynthetic process, GO:0016021: integral to membrane, GO:0016746: transferase activity, transferring acyl groups	00564: Glycerophospholipid metabolism	8.16089	8.20564	8.25958	8.24407	7.98863	8.09738	7.70287	7.72188
4863	NPAT	nuclear protein, ataxia-telangiectasia locus	GO:0000083: regulation of transcription involved in G1/S phase of mitotic cell cycle, GO:0003700: sequence-specific DNA binding transcription factor activity, GO:0003713: transcription coactivator activity, GO:0003713: transcription coactivator activity, GO:0003714: transcription corepressor activity, GO:0005515: protein binding, GO:0005634: nucleus, GO:0006351: transcription, DNA-dependent, GO:0…		6.77994	6.94482	6.9578	6.9263	6.63621	6.7581	6.25813	6.17807
80255	SLC35F5	solute carrier family 35, member F5	GO:0006810: transport, GO:0016021: integral to membrane		8.29012	8.39671	8.42943	8.3959	8.27589	8.33319	7.9422	7.99773
55233	MOB1A	MOB kinase activator 1A	GO:0005515: protein binding, GO:0005829: cytosol, GO:0035329: hippo signaling cascade, GO:0035329: hippo signaling cascade, GO:0046872: metal ion binding		9.9375	10.0001	10.0849	10.025	9.9342	9.95109	9.67383	9.71242
26092	TOR1AIP1	torsin A interacting protein 1	GO:0005637: nuclear inner membrane, GO:0016021: integral to membrane		8.6288	8.61305	8.75719	8.80065	8.53198	8.42619	8.29073	8.30541
84668	FAM126A	family with sequence similarity 126, member A	GO:0004871: signal transducer activity, GO:0005575: cellular_component, GO:0005737: cytoplasm, GO:0007165: signal transduction, GO:0008150: biological_process, GO:0016020: membrane		7.82625	7.8014	7.93077	7.95427	7.75345	7.62258	7.45334	7.49295
221477	C6orf89	chromosome 6 open reading frame 89	GO:0005737: cytoplasm, GO:0005886: plasma membrane, GO:0016021: integral to membrane, GO:0042060: wound healing, GO:0045787: positive regulation of cell cycle, GO:0050673: epithelial cell proliferation		7.71161	7.69128	7.83044	7.819	7.67866	7.58909	7.49495	7.48246
254225	RNF169	ring finger protein 169	GO:0005654: nucleoplasm, GO:0006974: response to DNA damage stimulus, GO:0008270: zinc ion binding, GO:0016567: protein ubiquitination, GO:0016874: ligase activity, GO:0035861: site of double-strand break, GO:0070530: K63-linked polyubiquitin binding, GO:2000780: negative regulation of double-strand break repair		8.04337	8.04664	8.2538	8.2303	7.94834	7.87222	7.74856	7.72265
392459	CXXC1P1	CXXC finger protein 1 pseudogene 1			2.60948	2.57179	2.75368	2.7078	2.60948	2.50547	2.37222	2.36165
22880	MORC2	MORC family CW-type zinc finger 2	GO:0005524: ATP binding, GO:0005634: nucleus, GO:0005829: cytosol, GO:0008270: zinc ion binding		6.97459	6.95487	7.09055	7.02055	6.91526	6.90408	6.75218	6.77023
221143	N6AMT2	N-6 adenine-specific DNA methyltransferase 2 (putative)	GO:0003676: nucleic acid binding, GO:0008168: methyltransferase activity		5.23635	4.97249	5.50619	5.40138	4.90139	4.78523	4.31187	4.44019
81537	SGPP1	sphingosine-1-phosphate phosphatase 1	GO:0005789: endoplasmic reticulum membrane, GO:0006665: sphingolipid metabolic process, GO:0006668: sphinganine-1-phosphate metabolic process, GO:0006670: sphingosine metabolic process, GO:0006915: apoptotic process, GO:0016021: integral to membrane, GO:0030148: sphingolipid biosynthetic process, GO:0042392: sphingosine-1-phosphate phosphatase activity, GO:0044281: small molecule metabolic process	00600: Sphingolipid metabolism	7.3645	7.43132	7.5898	7.48878	7.42228	7.45052	7.23246	7.13975
391196	OR2M7	olfactory receptor, family 2, subfamily M, member 7	GO:0004930: G-protein coupled receptor activity, GO:0004984: olfactory receptor activity, GO:0005886: plasma membrane, GO:0016021: integral to membrane	04740: Olfactory transduction	0.933412	1.11444	1.54123	1.56615	1.11444	1.32096	0.658025	0.387545
84524	ZC3H8	zinc finger CCCH-type containing 8	GO:0003700: sequence-specific DNA binding transcription factor activity, GO:0003723: RNA binding, GO:0005634: nucleus, GO:0006351: transcription, DNA-dependent, GO:0006355: regulation of transcription, DNA-dependent, GO:0006915: apoptotic process, GO:0008270: zinc ion binding, GO:0033085: negative regulation of T cell differentiation in thymus, GO:0043029: T cell homeostasis, GO:0043565: sequence…		6.57874	6.47082	6.85887	6.75842	6.71786	6.57637	6.12338	6.03907
2787	GNG5	guanine nucleotide binding protein (G protein), gamma 5	GO:0003924: GTPase activity, GO:0004871: signal transducer activity, GO:0005834: heterotrimeric G-protein complex, GO:0005886: plasma membrane, GO:0006112: energy reserve metabolic process, GO:0006184: GTP catabolic process, GO:0007165: signal transduction, GO:0007186: G-protein coupled receptor signaling pathway, GO:0007268: synaptic transmission, GO:0044281: small molecule metabolic process, GO…	04062: Chemokine signaling pathway	6.91227	6.87295	7.24615	7.16316	6.85937	6.92423	6.30425	6.4359
113263	GLCCI1	glucocorticoid induced transcript 1	GO:0005737: cytoplasm		5.44478	5.81193	6.12391	6.07431	5.80818	5.78305	5.20919	5.35939
7705	ZNF146	zinc finger protein 146	GO:0003677: DNA binding, GO:0005634: nucleus, GO:0005730: nucleolus, GO:0005737: cytoplasm, GO:0006355: regulation of transcription, DNA-dependent, GO:0008201: heparin binding, GO:0008270: zinc ion binding		7.87363	7.96	8.26225	8.16562	8.04732	7.97027	7.6582	7.69263
147657	ZNF480	zinc finger protein 480	GO:0003676: nucleic acid binding, GO:0005634: nucleus, GO:0005737: cytoplasm, GO:0006351: transcription, DNA-dependent, GO:0006355: regulation of transcription, DNA-dependent, GO:0008270: zinc ion binding		6.52985	6.78736	7.22009	6.99241	6.80089	6.72578	6.34382	6.38939
91351	DDX60L	DEAD (Asp-Glu-Ala-Asp) box polypeptide 60-like	GO:0003723: RNA binding, GO:0005524: ATP binding, GO:0008026: ATP-dependent helicase activity		7.95024	7.94724	8.13784	8.2029	7.95212	7.96581	7.76943	7.69275
55173	MRPS10	mitochondrial ribosomal protein S10	GO:0003674: molecular_function, GO:0003735: structural constituent of ribosome, GO:0005739: mitochondrion, GO:0005840: ribosome, GO:0006412: translation, GO:0008150: biological_process		7.80242	7.8769	8.00397	8.12175	7.80244	7.81016	7.54207	7.48826
51026	GOLT1B	golgi transport 1B	GO:0000139: Golgi membrane, GO:0004871: signal transducer activity, GO:0005783: endoplasmic reticulum, GO:0007165: signal transduction, GO:0015031: protein transport, GO:0016021: integral to membrane, GO:0016192: vesicle-mediated transport, GO:0043123: positive regulation of I-kappaB kinase/NF-kappaB cascade		8.30762	8.47927	8.55706	8.61148	8.41077	8.37132	8.07634	8.09345
10186	LHFP	lipoma HMGIC fusion partner	GO:0003677: DNA binding, GO:0016021: integral to membrane		8.66409	8.71011	8.80046	8.82719	8.69779	8.65764	8.4664	8.51764
10618	TGOLN2	trans-golgi network protein 2	GO:0005515: protein binding, GO:0005634: nucleus, GO:0005794: Golgi apparatus, GO:0005802: trans-Golgi network, GO:0005886: plasma membrane, GO:0016021: integral to membrane, GO:0030133: transport vesicle		8.75993	8.80485	8.87541	8.93455	8.80751	8.77735	8.54536	8.60337
112616	CMTM7	CKLF-like MARVEL transmembrane domain containing 7	GO:0005125: cytokine activity, GO:0005615: extracellular space, GO:0006935: chemotaxis, GO:0016021: integral to membrane		8.04792	8.07108	8.17509	8.21039	8.1179	8.01218	7.88232	7.90862
11162	NUDT6	nudix (nucleoside diphosphate linked moiety X)-type motif 6	GO:0005575: cellular_component, GO:0005634: nucleus, GO:0005739: mitochondrion, GO:0008083: growth factor activity, GO:0008150: biological_process, GO:0016787: hydrolase activity		4.97748	5.015	5.34025	5.52985	5.09438	4.89505	4.58409	4.53943
27249	MMADHC	methylmalonic aciduria (cobalamin deficiency) cblD type, with homocystinuria	GO:0005739: mitochondrion, GO:0009235: cobalamin metabolic process		8.7163	8.74509	8.85285	8.91012	8.74721	8.69598	8.52914	8.5531
340037	PRR7-AS1	PRR7 antisense RNA 1			4.52236	4.34317	4.70856	4.80402	4.63685	4.72502	4.26421	4.1211
119764	OR4X2	olfactory receptor, family 4, subfamily X, member 2	GO:0004930: G-protein coupled receptor activity, GO:0004984: olfactory receptor activity, GO:0005886: plasma membrane, GO:0016021: integral to membrane	04740: Olfactory transduction	3.65209	3.55066	3.9895	3.79991	3.60973	3.65956	3.35724	3.17855
113612	CYP2U1	cytochrome P450, family 2, subfamily U, polypeptide 1	GO:0005789: endoplasmic reticulum membrane, GO:0006805: xenobiotic metabolic process, GO:0009055: electron carrier activity, GO:0016021: integral to membrane, GO:0020037: heme binding, GO:0044281: small molecule metabolic process, GO:0070330: aromatase activity	00590: Arachidonic acid metabolism, 01100: Metabolic pathways	6.26082	6.18666	6.50833	6.46846	6.28581	6.32044	6.18166	6.04187
10153	CEBPZ	CCAAT/enhancer binding protein (C/EBP), zeta	GO:0003677: DNA binding, GO:0005634: nucleus, GO:0006355: regulation of transcription, DNA-dependent, GO:0006366: transcription from RNA polymerase II promoter		8.05482	8.12996	7.84239	7.89376	8.07336	8.10483	7.40977	7.3714
80380	PDCD1LG2	programmed cell death 1 ligand 2	GO:0003674: molecular_function, GO:0005576: extracellular region, GO:0005886: plasma membrane, GO:0006955: immune response, GO:0012505: endomembrane system, GO:0016021: integral to membrane, GO:0031295: T cell costimulation, GO:0042102: positive regulation of T cell proliferation, GO:0042130: negative regulation of T cell proliferation	04514: Cell adhesion molecules (CAMs)	8.07743	8.09684	7.57505	7.71585	7.97137	8.08767	6.99698	6.95143
2957	GTF2A1	general transcription factor IIA, 1, 19/37kDa	GO:0003677: DNA binding, GO:0003713: transcription coactivator activity, GO:0005515: protein binding, GO:0005654: nucleoplasm, GO:0005672: transcription factor TFIIA complex, GO:0006355: regulation of transcription, DNA-dependent, GO:0006366: transcription from RNA polymerase II promoter, GO:0006366: transcription from RNA polymerase II promoter, GO:0006367: transcription initiation from RNA poly…	03022: Basal transcription factors	7.65301	7.77238	7.28401	7.25202	7.61796	7.62221	6.61919	6.52801
79691	QTRTD1	queuine tRNA-ribosyltransferase domain containing 1	GO:0005737: cytoplasm, GO:0005739: mitochondrion, GO:0008479: queuine tRNA-ribosyltransferase activity, GO:0008616: queuosine biosynthetic process, GO:0008616: queuosine biosynthetic process, GO:0046872: metal ion binding		6.70517	6.7969	6.376	6.42756	6.63073	6.66072	5.78067	5.82721
1810	DR1	down-regulator of transcription 1, TBP-binding (negative cofactor 2)	GO:0000122: negative regulation of transcription from RNA polymerase II promoter, GO:0003677: DNA binding, GO:0003714: transcription corepressor activity, GO:0005515: protein binding, GO:0005671: Ada2/Gcn5/Ada3 transcription activator complex, GO:0006351: transcription, DNA-dependent, GO:0008134: transcription factor binding, GO:0017025: TBP-class protein binding, GO:0043565: sequence-specific DN…		9.10027	9.12135	8.87071	8.93983	9.13633	9.05536	8.63201	8.57846
9690	UBE3C	ubiquitin protein ligase E3C	GO:0000209: protein polyubiquitination, GO:0000502: proteasome complex, GO:0004842: ubiquitin-protein ligase activity, GO:0005515: protein binding, GO:0005622: intracellular, GO:0005634: nucleus, GO:0005737: cytoplasm, GO:0042787: protein ubiquitination involved in ubiquitin-dependent protein catabolic process	04120: Ubiquitin mediated proteolysis	8.97586	8.97267	8.83622	8.85759	8.95657	8.94433	8.70051	8.64443
3843	IPO5	importin 5	GO:0005095: GTPase inhibitor activity, GO:0005515: protein binding, GO:0005634: nucleus, GO:0005643: nuclear pore, GO:0005730: nucleolus, GO:0005737: cytoplasm, GO:0006607: NLS-bearing substrate import into nucleus, GO:0006610: ribosomal protein import into nucleus, GO:0008536: Ran GTPase binding, GO:0008565: protein transporter activity, GO:0044419: interspecies interaction between organisms		10.0829	10.0709	9.97916	9.96164	10.0422	10.0688	9.85247	9.81739
8697	CDC23	cell division cycle 23 homolog (S. cerevisiae)	GO:0000075: cell cycle checkpoint, GO:0000080: G1 phase of mitotic cell cycle, GO:0000278: mitotic cell cycle, GO:0004842: ubiquitin-protein ligase activity, GO:0005622: intracellular, GO:0005654: nucleoplasm, GO:0005680: anaphase-promoting complex, GO:0005829: cytosol, GO:0006511: ubiquitin-dependent protein catabolic process, GO:0007049: cell cycle, GO:0007067: mitosis, GO:0007080: mitotic meta…	04110: Cell cycle, 04114: Oocyte meiosis, 04120: Ubiquitin mediated proteolysis, 04914: Progesterone-mediated oocyte maturation	8.43679	8.43855	8.07964	8.12571	8.45181	8.46587	7.81711	7.7523
8890	EIF2B4	eukaryotic translation initiation factor 2B, subunit 4 delta, 67kDa	GO:0001541: ovarian follicle development, GO:0003743: translation initiation factor activity, GO:0005085: guanyl-nucleotide exchange factor activity, GO:0005085: guanyl-nucleotide exchange factor activity, GO:0005515: protein binding, GO:0005737: cytoplasm, GO:0005829: cytosol, GO:0005851: eukaryotic translation initiation factor 2B complex, GO:0006412: translation, GO:0006413: translational init…	03013: RNA transport	7.87701	7.85767	7.59122	7.61998	7.83337	7.8818	7.44488	7.41806
51067	YARS2	tyrosyl-tRNA synthetase 2, mitochondrial	GO:0000049: tRNA binding, GO:0000049: tRNA binding, GO:0004831: tyrosine-tRNA ligase activity, GO:0004831: tyrosine-tRNA ligase activity, GO:0004831: tyrosine-tRNA ligase activity, GO:0005524: ATP binding, GO:0005739: mitochondrion, GO:0005739: mitochondrion, GO:0005739: mitochondrion, GO:0005739: mitochondrion, GO:0005759: mitochondrial matrix, GO:0006412: translation, GO:0006418: tRNA aminoacyl…	00970: Aminoacyl-tRNA biosynthesis	6.36593	6.37819	5.79964	5.76294	6.30577	6.33208	5.45158	5.38709
84267	C9orf64	chromosome 9 open reading frame 64	GO:0003674: molecular_function, GO:0005575: cellular_component, GO:0008150: biological_process		7.3387	7.49185	6.70778	6.62323	7.2091	7.21566	6.05638	6.03602
27252	KLHL20	kelch-like 20 (Drosophila)	GO:0003779: actin binding, GO:0004842: ubiquitin-protein ligase activity, GO:0005515: protein binding, GO:0005634: nucleus, GO:0005737: cytoplasm, GO:0005794: Golgi apparatus, GO:0007010: cytoskeleton organization, GO:0009986: cell surface, GO:0015629: actin cytoskeleton, GO:0016567: protein ubiquitination, GO:0016605: PML body, GO:0019964: interferon-gamma binding, GO:0031463: Cul3-RING ubiquiti…		7.5703	7.59164	7.22924	7.15345	7.56625	7.49995	6.86571	6.87654
9411	ARHGAP29	Rho GTPase activating protein 29	GO:0005100: Rho GTPase activator activity, GO:0005829: cytosol, GO:0007264: small GTPase mediated signal transduction, GO:0007266: Rho protein signal transduction, GO:0032321: positive regulation of Rho GTPase activity, GO:0046872: metal ion binding, GO:0051056: regulation of small GTPase mediated signal transduction		8.34168	8.3332	7.56574	7.61409	8.02237	8.03102	7.09275	7.01893
26589	MRPL46	mitochondrial ribosomal protein L46	GO:0003674: molecular_function, GO:0005575: cellular_component, GO:0005739: mitochondrion, GO:0005840: ribosome, GO:0008150: biological_process, GO:0016787: hydrolase activity		7.82832	7.90635	7.02639	7.09454	7.56053	7.55199	6.46178	6.41869
26271	FBXO5	F-box protein 5	GO:0000082: G1/S transition of mitotic cell cycle, GO:0000083: regulation of transcription involved in G1/S phase of mitotic cell cycle, GO:0000087: M phase of mitotic cell cycle, GO:0000089: mitotic metaphase, GO:0000278: mitotic cell cycle, GO:0001556: oocyte maturation, GO:0005515: protein binding, GO:0005634: nucleus, GO:0005654: nucleoplasm, GO:0005737: cytoplasm, GO:0005819: spindle, GO:000…	04114: Oocyte meiosis	7.87946	7.86113	6.49428	6.48979	7.2646	7.39447	5.44275	5.2574
51260	CXorf26	chromosome X open reading frame 26	GO:0003674: molecular_function, GO:0005575: cellular_component, GO:0008150: biological_process		7.37804	7.39436	6.68582	6.73612	7.00137	7.05611	6.02196	6.02907
8329	HIST1H2AI	histone cluster 1, H2ai		05322: Systemic lupus erythematosus	9.38177	9.30054	8.25659	8.24456	8.92805	8.84258	7.14703	7.32487
81929	SEH1L	SEH1-like (S. cerevisiae)	GO:0000087: M phase of mitotic cell cycle, GO:0000236: mitotic prometaphase, GO:0000278: mitotic cell cycle, GO:0000776: kinetochore, GO:0000777: condensed chromosome kinetochore, GO:0005635: nuclear envelope, GO:0005829: cytosol, GO:0005975: carbohydrate metabolic process, GO:0006999: nuclear pore organization, GO:0007080: mitotic metaphase plate congression, GO:0008645: hexose transport, GO:001…	03013: RNA transport	8.5167	8.48313	8.164	8.06597	8.67123	8.69117	7.88231	7.98121
29914	UBIAD1	UbiA prenyltransferase domain containing 1	GO:0004659: prenyltransferase activity, GO:0005634: nucleus, GO:0005737: cytoplasm, GO:0005739: mitochondrion, GO:0005783: endoplasmic reticulum, GO:0005789: endoplasmic reticulum membrane, GO:0009234: menaquinone biosynthetic process, GO:0016020: membrane, GO:0016021: integral to membrane, GO:0042371: vitamin K biosynthetic process		6.75455	6.58042	5.94405	5.87876	7.07426	6.99649	5.69921	5.78972
10473	HMGN4	high mobility group nucleosomal binding domain 4	GO:0000785: chromatin, GO:0005634: nucleus, GO:0031492: nucleosomal DNA binding		8.04599	8.01514	7.73403	7.7867	8.09116	8.12502	7.66074	7.62357
94107	TMEM203	transmembrane protein 203	GO:0016021: integral to membrane		6.50251	6.42461	6.05962	6.02666	6.59795	6.64029	5.92404	5.86767
83732	RIOK1	RIO kinase 1 (yeast)	GO:0004674: protein serine/threonine kinase activity, GO:0005524: ATP binding	03008: Ribosome biogenesis in eukaryotes	6.90786	6.9429	6.32836	6.34731	7.05306	7.04664	6.26999	6.23497
55596	ZCCHC8	zinc finger, CCHC domain containing 8	GO:0000398: nuclear mRNA splicing, via spliceosome, GO:0003676: nucleic acid binding, GO:0005515: protein binding, GO:0005634: nucleus, GO:0008270: zinc ion binding, GO:0071013: catalytic step 2 spliceosome		7.51134	7.54906	7.21701	7.14018	7.69041	7.67299	6.91599	6.94271
7745	ZNF192	zinc finger protein 192	GO:0003677: DNA binding, GO:0003700: sequence-specific DNA binding transcription factor activity, GO:0005634: nucleus, GO:0005730: nucleolus, GO:0005737: cytoplasm, GO:0006351: transcription, DNA-dependent, GO:0008270: zinc ion binding, GO:0016032: viral reproduction		6.83859	6.91672	6.34409	6.36934	7.06143	7.09658	5.99628	5.97171
9510	ADAMTS1	ADAM metallopeptidase with thrombospondin type 1 motif, 1	GO:0001542: ovulation from ovarian follicle, GO:0001822: kidney development, GO:0004222: metalloendopeptidase activity, GO:0005604: basement membrane, GO:0006508: proteolysis, GO:0007229: integrin-mediated signaling pathway, GO:0008201: heparin binding, GO:0008237: metallopeptidase activity, GO:0008270: zinc ion binding, GO:0008285: negative regulation of cell proliferation, GO:0031410: cytoplasm…		10.0655	10.1256	8.59672	8.67652	10.1063	10.1037	8.00432	8.0999
57017	COQ9	coenzyme Q9 homolog (S. cerevisiae)	GO:0005739: mitochondrion, GO:0006744: ubiquinone biosynthetic process		7.87483	7.89587	7.53759	7.53411	7.85235	7.86072	7.40486	7.41998
8661	EIF3A	eukaryotic translation initiation factor 3, subunit A	GO:0001732: formation of translation initiation complex, GO:0003743: translation initiation factor activity, GO:0003743: translation initiation factor activity, GO:0005198: structural molecule activity, GO:0005515: protein binding, GO:0005634: nucleus, GO:0005730: nucleolus, GO:0005737: cytoplasm, GO:0005737: cytoplasm, GO:0005829: cytosol, GO:0005852: eukaryotic translation initiation factor 3 c…	03013: RNA transport	10.2639	10.2846	10.2702	10.2796	10.3269	10.2978	10.1846	10.1878
2805	GOT1	glutamic-oxaloacetic transaminase 1, soluble (aspartate aminotransferase 1)	GO:0000096: sulfur amino acid metabolic process, GO:0004069: L-aspartate:2-oxoglutarate aminotransferase activity, GO:0004069: L-aspartate:2-oxoglutarate aminotransferase activity, GO:0004069: L-aspartate:2-oxoglutarate aminotransferase activity, GO:0004609: phosphatidylserine decarboxylase activity, GO:0005737: cytoplasm, GO:0005764: lysosome, GO:0005829: cytosol, GO:0005975: carbohydrate metabo…	00250: Alanine, aspartate and glutamate metabolism, 00270: Cysteine and methionine metabolism, 00330: Arginine and proline metabolism, 00350: Tyrosine metabolism, 00360: Phenylalanine metabolism, 00400: Phenylalanine, tyrosine and tryptophan biosynthesis, 01100: Metabolic pathways	9.43172	9.49464	9.42118	9.53235	9.59108	9.57003	9.19715	9.15247
3428	IFI16	interferon, gamma-inducible protein 16	GO:0003690: double-stranded DNA binding, GO:0005515: protein binding, GO:0005634: nucleus, GO:0005654: nucleoplasm, GO:0005730: nucleolus, GO:0005737: cytoplasm, GO:0006351: transcription, DNA-dependent, GO:0006355: regulation of transcription, DNA-dependent, GO:0008283: cell proliferation, GO:0009615: response to virus, GO:0016607: nuclear speck, GO:0030097: hemopoiesis, GO:0030099: myeloid cell…		9.62498	9.65698	9.54942	9.62928	9.66685	9.65668	9.10472	9.06717
10172	ZNF256	zinc finger protein 256	GO:0003677: DNA binding, GO:0003700: sequence-specific DNA binding transcription factor activity, GO:0005515: protein binding, GO:0005634: nucleus, GO:0006351: transcription, DNA-dependent, GO:0006355: regulation of transcription, DNA-dependent, GO:0007275: multicellular organismal development, GO:0008270: zinc ion binding, GO:0045892: negative regulation of transcription, DNA-dependent		4.49775	4.57453	4.36271	4.54441	4.8306	4.50711	3.37106	3.33335
54529	ASNSD1	asparagine synthetase domain containing 1	GO:0003674: molecular_function, GO:0004066: asparagine synthase (glutamine-hydrolyzing) activity, GO:0005575: cellular_component, GO:0006529: asparagine biosynthetic process, GO:0006541: glutamine metabolic process, GO:0008150: biological_process		7.26105	7.29355	7.19801	7.12285	7.3074	7.28043	6.59342	6.54702
4801	NFYB	nuclear transcription factor Y, beta	GO:0003677: DNA binding, GO:0003700: sequence-specific DNA binding transcription factor activity, GO:0005515: protein binding, GO:0005634: nucleus, GO:0006351: transcription, DNA-dependent, GO:0006355: regulation of transcription, DNA-dependent, GO:0006355: regulation of transcription, DNA-dependent, GO:0016602: CCAAT-binding factor complex, GO:0043565: sequence-specific DNA binding, GO:0045893: …	04612: Antigen processing and presentation	7.69488	7.77087	7.72703	7.73658	7.91982	7.86263	7.35415	7.21198
54468	MIOS	missing oocyte, meiosis regulator, homolog (Drosophila)			6.69911	6.7239	6.66455	6.61181	6.85662	6.79976	6.33283	6.1799
25972	UNC50	unc-50 homolog (C. elegans)	GO:0000139: Golgi membrane, GO:0003723: RNA binding, GO:0005637: nuclear inner membrane, GO:0007166: cell surface receptor signaling pathway, GO:0015031: protein transport, GO:0016021: integral to membrane		6.91349	6.9122	6.61084	6.76352	7.11145	6.97493	6.32215	6.21424
3885	KRT34	keratin 34	GO:0005198: structural molecule activity, GO:0005882: intermediate filament, GO:0008544: epidermis development		7.53847	7.52148	7.24594	7.37832	7.68252	7.59169	6.89611	6.87117
339324	ZNF260	zinc finger protein 260	GO:0003677: DNA binding, GO:0005634: nucleus, GO:0005737: cytoplasm, GO:0006351: transcription, DNA-dependent, GO:0006355: regulation of transcription, DNA-dependent, GO:0007275: multicellular organismal development, GO:0008270: zinc ion binding		6.52546	6.5163	6.02698	6.07495	6.84806	6.9931	5.44669	5.10276
55900	ZNF302	zinc finger protein 302	GO:0003677: DNA binding, GO:0005634: nucleus, GO:0006351: transcription, DNA-dependent, GO:0006355: regulation of transcription, DNA-dependent, GO:0008270: zinc ion binding		6.33814	6.25684	6.19277	6.19851	6.36744	6.4143	6.01762	5.96439
401264	FLJ37798	uncharacterized LOC401264			5.30471	5.21524	5.21242	5.17876	5.428	5.42347	4.92749	4.86134
7559	ZNF12	zinc finger protein 12	GO:0003677: DNA binding, GO:0005634: nucleus, GO:0006351: transcription, DNA-dependent, GO:0008270: zinc ion binding, GO:0045892: negative regulation of transcription, DNA-dependent		7.58512	7.68703	7.45925	7.31113	7.90522	7.87363	6.83068	6.75064
22894	DIS3	DIS3 mitotic control homolog (S. cerevisiae)	GO:0000175: 3'-5'-exoribonuclease activity, GO:0000176: nuclear exosome (RNase complex), GO:0000178: exosome (RNase complex), GO:0000288: nuclear-transcribed mRNA catabolic process, deadenylation-dependent decay, GO:0003723: RNA binding, GO:0004519: endonuclease activity, GO:0005085: guanyl-nucleotide exchange factor activity, GO:0005515: protein binding, GO:0005654: nucleoplasm, GO:0005829: cyto…	03018: RNA degradation	8.52659	8.49069	8.4146	8.41416	8.61536	8.69826	8.00364	8.00515
64083	GOLPH3	golgi phosphoprotein 3 (coat-protein)	GO:0005515: protein binding, GO:0005737: cytoplasm, GO:0005739: mitochondrion, GO:0005758: mitochondrial intermembrane space, GO:0005768: endosome, GO:0005802: trans-Golgi network, GO:0005829: cytosol, GO:0005886: plasma membrane, GO:0008283: cell proliferation, GO:0008289: lipid binding, GO:0010821: regulation of mitochondrion organization, GO:0031965: nuclear membrane, GO:0032008: positive regu…		9.62204	9.62505	9.56862	9.56467	9.66414	9.73917	9.3811	9.37247
144402	CPNE8	copine VIII			7.44692	7.55864	7.48307	7.47545	7.57126	7.60089	7.13875	7.14036
5987	TRIM27	tripartite motif containing 27	GO:0000122: negative regulation of transcription from RNA polymerase II promoter, GO:0002820: negative regulation of adaptive immune response, GO:0003676: nucleic acid binding, GO:0003677: DNA binding, GO:0004714: transmembrane receptor protein tyrosine kinase activity, GO:0004842: ubiquitin-protein ligase activity, GO:0005515: protein binding, GO:0005634: nucleus, GO:0005654: nucleoplasm, GO:000…		7.17866	7.34145	7.01861	7.10789	7.28789	7.37482	6.41829	6.47941
122553	TRAPPC6B	trafficking protein particle complex 6B	GO:0005783: endoplasmic reticulum, GO:0005794: Golgi apparatus, GO:0016192: vesicle-mediated transport		7.23563	7.28915	7.15741	7.14517	7.31374	7.30137	6.76108	6.78911
26574	AATF	apoptosis antagonizing transcription factor	GO:0003700: sequence-specific DNA binding transcription factor activity, GO:0005515: protein binding, GO:0005634: nucleus, GO:0005730: nucleolus, GO:0005737: cytoplasm, GO:0005794: Golgi apparatus, GO:0005813: centrosome, GO:0005925: focal adhesion, GO:0006351: transcription, DNA-dependent, GO:0006915: apoptotic process, GO:0006916: anti-apoptosis, GO:0006974: response to DNA damage stimulus, GO:…		9.33102	9.31262	9.30949	9.22069	9.37443	9.42752	8.95258	9.02793
7024	TFCP2	transcription factor CP2	GO:0003677: DNA binding, GO:0003700: sequence-specific DNA binding transcription factor activity, GO:0005575: cellular_component, GO:0005634: nucleus, GO:0006351: transcription, DNA-dependent, GO:0006357: regulation of transcription from RNA polymerase II promoter		7.06477	7.04348	6.89412	6.88871	7.15068	7.03586	6.43991	6.53068
54888	NSUN2	NOP2/Sun RNA methyltransferase family, member 2	GO:0000049: tRNA binding, GO:0005634: nucleus, GO:0005730: nucleolus, GO:0005737: cytoplasm, GO:0005819: spindle, GO:0007067: mitosis, GO:0016428: tRNA (cytosine-5-)-methyltransferase activity, GO:0030488: tRNA methylation, GO:0051301: cell division		8.47148	8.49016	8.40578	8.3834	8.45718	8.43878	8.07475	8.16278
57132	CHMP1B	charged multivesicular body protein 1B	GO:0005515: protein binding, GO:0005829: cytosol, GO:0007049: cell cycle, GO:0015031: protein transport, GO:0019904: protein domain specific binding, GO:0031902: late endosome membrane, GO:0051301: cell division	04144: Endocytosis	7.4979	7.548	7.69919	7.76726	7.88925	7.75032	7.44526	7.44706
100507458	LOC100507458	uncharacterized LOC100507458			3.52307	3.3862	3.52307	3.66973	3.80055	3.69774	3.33455	3.22867
391211	OR2G6	olfactory receptor, family 2, subfamily G, member 6	GO:0004930: G-protein coupled receptor activity, GO:0004984: olfactory receptor activity, GO:0005886: plasma membrane, GO:0016021: integral to membrane	04740: Olfactory transduction	2.43244	2.38193	2.52077	2.54985	2.60883	2.72259	2.2143	2.23783
55119	PRPF38B	PRP38 pre-mRNA processing factor 38 (yeast) domain containing B	GO:0005681: spliceosomal complex, GO:0006397: mRNA processing, GO:0008380: RNA splicing	03040: Spliceosome	7.10924	7.13184	7.20772	7.34261	7.37807	7.37555	6.86229	6.92148
100132963	CXorf68	chromosome X open reading frame 68	GO:0005886: plasma membrane, GO:0016021: integral to membrane		1.65482	1.67325	1.75489	1.81974	1.871	1.96804	1.56704	1.67638
329	BIRC2	baculoviral IAP repeat containing 2	GO:0000209: protein polyubiquitination, GO:0001890: placenta development, GO:0003713: transcription coactivator activity, GO:0004842: ubiquitin-protein ligase activity, GO:0005515: protein binding, GO:0005634: nucleus, GO:0005829: cytosol, GO:0006351: transcription, DNA-dependent, GO:0006355: regulation of transcription, DNA-dependent, GO:0006915: apoptotic process, GO:0006916: anti-apoptosis, GO…	04120: Ubiquitin mediated proteolysis, 04210: Apoptosis, 04510: Focal adhesion, 04621: NOD-like receptor signaling pathway, 05145: Toxoplasmosis, 05200: Pathways in cancer, 05222: Small cell lung cancer	6.67724	6.69519	6.68348	6.68184	6.83782	6.87964	6.46967	6.55429
389362	PSMG4	proteasome (prosome, macropain) assembly chaperone 4			6.54222	6.59097	6.54222	6.61984	6.70982	6.72214	6.33806	6.389
64921	CASD1	CAS1 domain containing 1	GO:0016021: integral to membrane		6.32349	6.41914	6.35491	6.44299	6.64354	6.6167	6.18611	6.21525
84365	MKI67IP	MKI67 (FHA domain) interacting nucleolar phosphoprotein	GO:0000166: nucleotide binding, GO:0000794: condensed nuclear chromosome, GO:0003723: RNA binding, GO:0005515: protein binding, GO:0005654: nucleoplasm, GO:0005730: nucleolus, GO:0005737: cytoplasm, GO:0006461: protein complex assembly, GO:0009303: rRNA transcription, GO:0010923: negative regulation of phosphatase activity, GO:0016072: rRNA metabolic process		8.35459	8.47425	8.35598	8.43289	8.78576	8.68916	8.16741	8.20494
29126	CD274	CD274 molecule	GO:0005515: protein binding, GO:0005886: plasma membrane, GO:0006955: immune response, GO:0007165: signal transduction, GO:0007166: cell surface receptor signaling pathway, GO:0008283: cell proliferation, GO:0009897: external side of plasma membrane, GO:0012505: endomembrane system, GO:0016021: integral to membrane, GO:0031295: T cell costimulation, GO:0042130: negative regulation of T cell proli…	04514: Cell adhesion molecules (CAMs)	5.95214	6.03835	6.25754	6.04527	6.47289	6.40386	5.44473	5.47038
54989	ZNF770	zinc finger protein 770	GO:0003677: DNA binding, GO:0005634: nucleus, GO:0006351: transcription, DNA-dependent, GO:0006355: regulation of transcription, DNA-dependent, GO:0008270: zinc ion binding		6.65964	6.70587	6.7632	6.62962	6.96269	6.90478	6.24164	6.21616
5876	RABGGTB	Rab geranylgeranyltransferase, beta subunit	GO:0004663: Rab geranylgeranyltransferase activity, GO:0005515: protein binding, GO:0006464: cellular protein modification process, GO:0007601: visual perception, GO:0046872: metal ion binding		8.20126	8.41224	8.34024	8.33854	8.55302	8.57096	7.97399	7.81886
390916	NUDT19	nudix (nucleoside diphosphate linked moiety X)-type motif 19	GO:0005102: receptor binding, GO:0005575: cellular_component, GO:0005739: mitochondrion, GO:0005777: peroxisome, GO:0008150: biological_process, GO:0016787: hydrolase activity, GO:0046872: metal ion binding	04146: Peroxisome	7.23674	7.3884	7.40879	7.37189	7.55867	7.54277	7.10957	7.00331
79026	AHNAK	AHNAK nucleoprotein	GO:0005515: protein binding, GO:0005634: nucleus, GO:0007399: nervous system development		9.40154	9.35498	9.36249	9.37413	8.75514	8.80087	9.03111	8.96787
284217	LAMA1	laminin, alpha 1	GO:0002011: morphogenesis of an epithelial sheet, GO:0005102: receptor binding, GO:0005201: extracellular matrix structural constituent, GO:0005576: extracellular region, GO:0005578: proteinaceous extracellular matrix, GO:0005604: basement membrane, GO:0005606: laminin-1 complex, GO:0005606: laminin-1 complex, GO:0005608: laminin-3 complex, GO:0005615: extracellular space, GO:0005911: cell-cell j…	04510: Focal adhesion, 04512: ECM-receptor interaction, 05145: Toxoplasmosis, 05146: Amoebiasis, 05200: Pathways in cancer, 05222: Small cell lung cancer	6.44456	6.40846	6.3735	6.3953	5.64382	5.64139	5.93475	5.86549
667	DST	dystonin	GO:0000226: microtubule cytoskeleton organization, GO:0003779: actin binding, GO:0005178: integrin binding, GO:0005509: calcium ion binding, GO:0005515: protein binding, GO:0005604: basement membrane, GO:0005634: nucleus, GO:0005635: nuclear envelope, GO:0005737: cytoplasm, GO:0005737: cytoplasm, GO:0005789: endoplasmic reticulum membrane, GO:0005882: intermediate filament, GO:0005938: cell corte…		8.73875	8.71677	8.67638	8.68712	8.0973	8.10255	8.27844	8.21012
283871	PGP	phosphoglycolate phosphatase	GO:0005975: carbohydrate metabolic process, GO:0008967: phosphoglycolate phosphatase activity	00630: Glyoxylate and dicarboxylate metabolism, 01100: Metabolic pathways	6.95222	6.91847	6.90322	7.02439	6.37095	6.39578	6.75062	6.78937
3708	ITPR1	inositol 1,4,5-trisphosphate receptor, type 1	GO:0001666: response to hypoxia, GO:0005218: intracellular ligand-gated calcium channel activity, GO:0005220: inositol 1,4,5-trisphosphate-sensitive calcium-release channel activity, GO:0005220: inositol 1,4,5-trisphosphate-sensitive calcium-release channel activity, GO:0005515: protein binding, GO:0005783: endoplasmic reticulum, GO:0005789: endoplasmic reticulum membrane, GO:0006112: energy rese…	04020: Calcium signaling pathway, 04070: Phosphatidylinositol signaling system, 04114: Oocyte meiosis, 04270: Vascular smooth muscle contraction, 04540: Gap junction, 04720: Long-term potentiation, 04730: Long-term depression, 04912: GnRH signaling pathway, 04970: Salivary secretion, 04971: Gastric acid secretion, 04972: Pancreatic secretion, 05010: Alzheimer's disease, 05016: Huntington's disease	5.21858	5.23882	5.13402	5.13402	4.53947	4.43803	4.84042	4.81683
23352	UBR4	ubiquitin protein ligase E3 component n-recognin 4	GO:0004842: ubiquitin-protein ligase activity, GO:0005516: calmodulin binding, GO:0005634: nucleus, GO:0005737: cytoplasm, GO:0005856: cytoskeleton, GO:0008270: zinc ion binding, GO:0016021: integral to membrane, GO:0044419: interspecies interaction between organisms		8.78304	8.77305	8.80719	8.77713	7.9177	7.99686	8.48461	8.37043
1718	DHCR24	24-dehydrocholesterol reductase	GO:0000139: Golgi membrane, GO:0005634: nucleus, GO:0005783: endoplasmic reticulum, GO:0005789: endoplasmic reticulum membrane, GO:0005789: endoplasmic reticulum membrane, GO:0005829: cytosol, GO:0005856: cytoskeleton, GO:0006695: cholesterol biosynthetic process, GO:0006695: cholesterol biosynthetic process, GO:0006695: cholesterol biosynthetic process, GO:0006695: cholesterol biosynthetic proce…	00100: Steroid biosynthesis, 01100: Metabolic pathways	10.5372	10.5624	10.5964	10.5587	9.95197	9.99861	10.227	10.2708
79674	VEPH1	ventricular zone expressed PH domain homolog 1 (zebrafish)	GO:0005543: phospholipid binding, GO:0005886: plasma membrane		7.36659	7.36012	7.44317	7.49134	6.46273	6.41669	6.28481	6.335
79772	MCTP1	multiple C2 domains, transmembrane 1	GO:0005509: calcium ion binding, GO:0016021: integral to membrane, GO:0019722: calcium-mediated signaling		6.37683	6.31165	6.66626	6.68266	5.21244	5.19275	4.72678	4.80958
9156	EXO1	exonuclease 1	GO:0002455: humoral immune response mediated by circulating immunoglobulin, GO:0003677: DNA binding, GO:0004523: ribonuclease H activity, GO:0004527: exonuclease activity, GO:0005515: protein binding, GO:0005634: nucleus, GO:0006281: DNA repair, GO:0006298: mismatch repair, GO:0006298: mismatch repair, GO:0006298: mismatch repair, GO:0006298: mismatch repair, GO:0006310: DNA recombination, GO:000…	03430: Mismatch repair	7.3347	7.40511	7.49831	7.39218	6.17768	6.06179	5.75191	5.63344
93081	TEX30	testis expressed 30			7.51102	7.50938	7.82232	7.75986	6.7473	6.79616	6.649	6.63484
23306	TMEM194A	transmembrane protein 194A	GO:0003674: molecular_function, GO:0008150: biological_process, GO:0016021: integral to membrane		8.0043	8.16634	8.45561	8.43533	7.31339	7.34488	7.24892	7.28075
9904	RBM19	RNA binding motif protein 19	GO:0000166: nucleotide binding, GO:0003723: RNA binding, GO:0005634: nucleus, GO:0005654: nucleoplasm, GO:0005694: chromosome, GO:0005730: nucleolus, GO:0005730: nucleolus, GO:0005737: cytoplasm, GO:0005737: cytoplasm, GO:0007275: multicellular organismal development, GO:0040019: positive regulation of embryonic development		6.29634	6.33672	6.52295	6.52989	5.95971	6.01695	6.00537	5.93835
51099	ABHD5	abhydrolase domain containing 5	GO:0003841: 1-acylglycerol-3-phosphate O-acyltransferase activity, GO:0005811: lipid particle, GO:0005829: cytosol, GO:0006629: lipid metabolic process, GO:0006631: fatty acid metabolic process, GO:0006654: phosphatidic acid biosynthetic process, GO:0010891: negative regulation of sequestering of triglyceride, GO:0010898: positive regulation of triglyceride catabolic process, GO:0019433: triglyce…		8.11249	8.13598	8.37841	8.3845	7.75358	7.80435	7.71796	7.62557
4311	MME	membrane metallo-endopeptidase	GO:0001822: kidney development, GO:0004175: endopeptidase activity, GO:0004175: endopeptidase activity, GO:0004222: metalloendopeptidase activity, GO:0005515: protein binding, GO:0005737: cytoplasm, GO:0005886: plasma membrane, GO:0005887: integral to plasma membrane, GO:0005903: brush border, GO:0006508: proteolysis, GO:0006518: peptide metabolic process, GO:0008021: synaptic vesicle, GO:0008270…	04614: Renin-angiotensin system, 04640: Hematopoietic cell lineage, 04974: Protein digestion and absorption, 05010: Alzheimer's disease	9.95024	9.98343	10.0911	10.065	9.79509	9.76851	9.58844	9.66098
1655	DDX5	DEAD (Asp-Glu-Ala-Asp) box helicase 5	GO:0000122: negative regulation of transcription from RNA polymerase II promoter, GO:0000381: regulation of alternative nuclear mRNA splicing, via spliceosome, GO:0000398: nuclear mRNA splicing, via spliceosome, GO:0003713: transcription coactivator activity, GO:0003724: RNA helicase activity, GO:0003724: RNA helicase activity, GO:0005515: protein binding, GO:0005524: ATP binding, GO:0005634: nuc…	03040: Spliceosome	9.64418	9.70193	9.74552	9.77159	9.5717	9.54223	9.44786	9.43453
100506661	LOC100506661	uncharacterized LOC100506661			6.27484	6.21351	6.37797	6.46463	5.98485	5.96804	5.8156	5.79801
119679	OR52J3	olfactory receptor, family 52, subfamily J, member 3	GO:0004930: G-protein coupled receptor activity, GO:0004984: olfactory receptor activity, GO:0005886: plasma membrane, GO:0016021: integral to membrane	04740: Olfactory transduction	3.21358	3.25246	3.28564	3.33175	3.02488	3.07181	2.92916	2.94542
54499	TMCO1	transmembrane and coiled-coil domains 1	GO:0000139: Golgi membrane, GO:0005789: endoplasmic reticulum membrane, GO:0016021: integral to membrane		8.96115	9.01463	9.1078	9.1391	8.65333	8.75588	8.50796	8.55871
29929	ALG6	asparagine-linked glycosylation 6, alpha-1,3-glucosyltransferase homolog (S. cerevisiae)	GO:0005575: cellular_component, GO:0005789: endoplasmic reticulum membrane, GO:0006487: protein N-linked glycosylation, GO:0006487: protein N-linked glycosylation, GO:0006488: dolichol-linked oligosaccharide biosynthetic process, GO:0016021: integral to membrane, GO:0018279: protein N-linked glycosylation via asparagine, GO:0043687: post-translational protein modification, GO:0044267: cellular pr…	00510: N-Glycan biosynthesis, 01100: Metabolic pathways	5.90818	5.90601	6.15229	6.11879	5.42466	5.54388	5.19304	5.13276
89795	NAV3	neuron navigator 3	GO:0000166: nucleotide binding, GO:0005640: nuclear outer membrane, GO:0017111: nucleoside-triphosphatase activity		7.91785	7.90606	8.27538	8.21183	7.34797	7.29882	7.02986	6.793
3419	IDH3A	isocitrate dehydrogenase 3 (NAD+) alpha	GO:0000287: magnesium ion binding, GO:0004449: isocitrate dehydrogenase (NAD+) activity, GO:0005739: mitochondrion, GO:0005759: mitochondrial matrix, GO:0005975: carbohydrate metabolic process, GO:0006099: tricarboxylic acid cycle, GO:0006102: isocitrate metabolic process, GO:0006103: 2-oxoglutarate metabolic process, GO:0006734: NADH metabolic process, GO:0044281: small molecule metabolic proces…	00020: Citrate cycle (TCA cycle), 01100: Metabolic pathways	9.02846	9.03229	9.09504	9.12335	8.76637	8.80918	8.60162	8.52386
26872	STEAP1	six transmembrane epithelial antigen of the prostate 1	GO:0005215: transporter activity, GO:0005886: plasma membrane, GO:0005887: integral to plasma membrane, GO:0005911: cell-cell junction, GO:0006810: transport, GO:0006811: ion transport, GO:0010008: endosome membrane, GO:0015267: channel activity, GO:0016491: oxidoreductase activity, GO:0022900: electron transport chain, GO:0046872: metal ion binding, GO:0055072: iron ion homeostasis		5.76702	5.67105	6.62908	6.41914	4.86462	5.15284	4.40641	4.12863
1105	CHD1	chromodomain helicase DNA binding protein 1	GO:0003677: DNA binding, GO:0004003: ATP-dependent DNA helicase activity, GO:0005515: protein binding, GO:0005524: ATP binding, GO:0005634: nucleus, GO:0005737: cytoplasm, GO:0006338: chromatin remodeling, GO:0006351: transcription, DNA-dependent, GO:0006357: regulation of transcription from RNA polymerase II promoter, GO:0035064: methylated histone residue binding		8.40568	8.34269	8.53578	8.46319	8.1993	8.19734	8.10507	8.09065
100289230	LOC100289230	uncharacterized LOC100289230			3.17544	3.20202	3.39637	3.40321	3.19453	3.16993	2.97609	3.09406
574414	PRR9	proline rich 9			8.32965	8.23929	8.91958	8.85403	8.44513	8.27814	8.00351	8.03135
29919	C18orf8	chromosome 18 open reading frame 8			6.82644	6.82099	7.02882	6.99239	6.86627	6.83786	6.76352	6.79526
5194	PEX13	peroxisomal biogenesis factor 13	GO:0001561: fatty acid alpha-oxidation, GO:0001764: neuron migration, GO:0001967: suckling behavior, GO:0005515: protein binding, GO:0005777: peroxisome, GO:0005778: peroxisomal membrane, GO:0005779: integral to peroxisomal membrane, GO:0007626: locomotory behavior, GO:0016560: protein import into peroxisome matrix, docking, GO:0016560: protein import into peroxisome matrix, docking, GO:0021795: …	04146: Peroxisome	6.99342	7.10949	7.32636	7.33913	7.11207	7.04632	6.9456	6.96304
148362	BROX	BRO1 domain and CAAX motif containing	GO:0016020: membrane		9.34614	9.41014	9.64443	9.60249	9.399	9.41554	9.2627	9.28093
101060166	NA				3.37774	3.26669	3.53936	3.52316	3.30576	3.39024	3.21564	3.21864
5514	PPP1R10	protein phosphatase 1, regulatory subunit 10	GO:0000785: chromatin, GO:0000790: nuclear chromatin, GO:0003677: DNA binding, GO:0003723: RNA binding, GO:0004864: protein phosphatase inhibitor activity, GO:0005634: nucleus, GO:0006351: transcription, DNA-dependent, GO:0006606: protein import into nucleus, GO:0008157: protein phosphatase 1 binding, GO:0008270: zinc ion binding, GO:0072357: PTW/PP1 phosphatase complex		7.90818	7.75957	8.50228	8.40088	7.64333	7.76278	7.37809	7.36876
151112	ZSWIM2	zinc finger, SWIM-type containing 2	GO:0000209: protein polyubiquitination, GO:0004842: ubiquitin-protein ligase activity, GO:0006915: apoptotic process, GO:0008270: zinc ion binding, GO:0042981: regulation of apoptotic process, GO:0043621: protein self-association		1.49016	1.3795	1.97088	1.83332	1.35382	1.45869	1.28115	1.30445
375061	FAM89A	family with sequence similarity 89, member A			5.24435	5.18924	5.6161	5.46211	5.14421	5.19677	5.09186	5.09104
63929	XPNPEP3	X-prolyl aminopeptidase (aminopeptidase P) 3, putative	GO:0004177: aminopeptidase activity, GO:0005739: mitochondrion, GO:0006508: proteolysis, GO:0008237: metallopeptidase activity, GO:0009987: cellular process, GO:0030145: manganese ion binding		6.02878	6.01358	6.39507	6.3567	5.99098	5.90443	5.98358	5.99042
488	ATP2A2	ATPase, Ca++ transporting, cardiac muscle, slow twitch 2	GO:0005388: calcium-transporting ATPase activity, GO:0005524: ATP binding, GO:0005789: endoplasmic reticulum membrane, GO:0005789: endoplasmic reticulum membrane, GO:0005887: integral to plasma membrane, GO:0006754: ATP biosynthetic process, GO:0006810: transport, GO:0007155: cell adhesion, GO:0007596: blood coagulation, GO:0008022: protein C-terminus binding, GO:0008544: epidermis development, G…	04020: Calcium signaling pathway, 04260: Cardiac muscle contraction, 04972: Pancreatic secretion, 05010: Alzheimer's disease, 05410: Hypertrophic cardiomyopathy (HCM), 05412: Arrhythmogenic right ventricular cardiomyopathy (ARVC), 05414: Dilated cardiomyopathy	9.73753	9.72045	10.2432	10.1898	9.59611	9.58143	9.6627	9.64142
25938	HEATR5A	HEAT repeat containing 5A			6.50835	6.51757	6.87313	6.79389	6.41588	6.38899	6.42912	6.41677
83443	SF3B5	splicing factor 3b, subunit 5, 10kDa	GO:0000398: nuclear mRNA splicing, via spliceosome, GO:0005634: nucleus, GO:0005654: nucleoplasm, GO:0005689: U12-type spliceosomal complex, GO:0008380: RNA splicing, GO:0010467: gene expression	03040: Spliceosome	7.01671	7.0344	7.2819	7.29306	6.96128	6.89261	6.98671	6.92498
115209	OMA1	OMA1 zinc metallopeptidase homolog (S. cerevisiae)	GO:0002024: diet induced thermogenesis, GO:0004222: metalloendopeptidase activity, GO:0005743: mitochondrial inner membrane, GO:0006006: glucose metabolic process, GO:0006515: misfolded or incompletely synthesized protein catabolic process, GO:0006629: lipid metabolic process, GO:0006950: response to stress, GO:0010637: negative regulation of mitochondrial fusion, GO:0016021: integral to membrane…		5.95153	6.05078	6.53657	6.36902	5.87108	5.83727	5.84904	5.79148
401466	C8orf59	chromosome 8 open reading frame 59			7.69233	7.72711	8.23219	8.25157	7.74034	7.6045	7.60206	7.52996
2012	EMP1	epithelial membrane protein 1	GO:0005886: plasma membrane, GO:0007275: multicellular organismal development, GO:0008283: cell proliferation, GO:0008544: epidermis development, GO:0016021: integral to membrane, GO:0016049: cell growth		10.2818	10.3203	10.5428	10.5315	10.325	10.2396	10.255	10.2444
4953	ODC1	ornithine decarboxylase 1	GO:0001822: kidney development, GO:0004586: ornithine decarboxylase activity, GO:0005575: cellular_component, GO:0005829: cytosol, GO:0006521: regulation of cellular amino acid metabolic process, GO:0006595: polyamine metabolic process, GO:0006596: polyamine biosynthetic process, GO:0008284: positive regulation of cell proliferation, GO:0009615: response to virus, GO:0033387: putrescine biosynthe…	00330: Arginine and proline metabolism, 00480: Glutathione metabolism, 01100: Metabolic pathways	10.6054	10.6911	11.1058	11.0629	10.379	10.491	10.3326	10.328
23064	SETX	senataxin	GO:0003677: DNA binding, GO:0003678: DNA helicase activity, GO:0005524: ATP binding, GO:0005634: nucleus, GO:0005654: nucleoplasm, GO:0005730: nucleolus, GO:0005737: cytoplasm, GO:0006302: double-strand break repair, GO:0006396: RNA processing, GO:0008219: cell death, GO:0032508: DNA duplex unwinding		7.82346	7.80946	8.28066	8.26428	7.57508	7.75499	7.58002	7.434
168850	ZNF800	zinc finger protein 800	GO:0003677: DNA binding, GO:0005634: nucleus, GO:0006351: transcription, DNA-dependent, GO:0006355: regulation of transcription, DNA-dependent, GO:0008270: zinc ion binding		7.72465	7.77134	8.31253	8.31772	7.60252	7.59976	7.56359	7.42688
9197	SLC33A1	solute carrier family 33 (acetyl-CoA transporter), member 1	GO:0000139: Golgi membrane, GO:0005789: endoplasmic reticulum membrane, GO:0005887: integral to plasma membrane, GO:0006810: transport, GO:0008219: cell death, GO:0008521: acetyl-CoA transporter activity, GO:0015876: acetyl-CoA transport, GO:0055085: transmembrane transport	00604: Glycosphingolipid biosynthesis - ganglio series, 01100: Metabolic pathways	6.05062	6.0619	6.71302	6.75065	5.89125	5.92868	5.86266	5.64852
836	CASP3	caspase 3, apoptosis-related cysteine peptidase	GO:0001782: B cell homeostasis, GO:0001836: release of cytochrome c from mitochondria, GO:0004190: aspartic-type endopeptidase activity, GO:0004197: cysteine-type endopeptidase activity, GO:0004197: cysteine-type endopeptidase activity, GO:0004861: cyclin-dependent protein kinase inhibitor activity, GO:0005515: protein binding, GO:0005634: nucleus, GO:0005654: nucleoplasm, GO:0005737: cytoplasm, …	04010: MAPK signaling pathway, 04115: p53 signaling pathway, 04210: Apoptosis, 04650: Natural killer cell mediated cytotoxicity, 05010: Alzheimer's disease, 05012: Parkinson's disease, 05014: Amyotrophic lateral sclerosis (ALS), 05016: Huntington's disease, 05120: Epithelial cell signaling in Helicobacter pylori infection, 05145: Toxoplasmosis, 05146: Amoebiasis, 05200: Pathways in cancer, 05210:…	7.35517	7.42765	7.83153	7.79745	7.22007	7.22294	7.26867	7.12901
122706	PSMB11	proteasome (prosome, macropain) subunit, beta type, 11	GO:0000075: cell cycle checkpoint, GO:0000084: S phase of mitotic cell cycle, GO:0000209: protein polyubiquitination, GO:0000216: M/G1 transition of mitotic cell cycle, GO:0000278: mitotic cell cycle, GO:0002474: antigen processing and presentation of peptide antigen via MHC class I, GO:0002479: antigen processing and presentation of exogenous peptide antigen via MHC class I, TAP-dependent, GO:00…	03050: Proteasome	2.57788	2.81376	3.1779	3.0728	2.58232	2.66383	2.42235	2.4112
9097	USP14	ubiquitin specific peptidase 14 (tRNA-guanine transglycosylase)	GO:0000502: proteasome complex, GO:0004197: cysteine-type endopeptidase activity, GO:0004221: ubiquitin thiolesterase activity, GO:0004843: ubiquitin-specific protease activity, GO:0004866: endopeptidase inhibitor activity, GO:0005515: protein binding, GO:0005737: cytoplasm, GO:0005886: plasma membrane, GO:0006511: ubiquitin-dependent protein catabolic process, GO:0007268: synaptic transmission, …		9.06055	9.12757	9.32187	9.27551	9.01336	9.06014	8.95427	8.97622
122809	SOCS4	suppressor of cytokine signaling 4	GO:0005622: intracellular, GO:0007175: negative regulation of epidermal growth factor-activated receptor activity, GO:0016567: protein ubiquitination, GO:0035556: intracellular signal transduction, GO:0040008: regulation of growth	04630: Jak-STAT signaling pathway, 04910: Insulin signaling pathway, 04930: Type II diabetes mellitus	7.36808	7.4333	7.67154	7.7734	7.20816	7.17261	6.98943	6.98665
79587	CARS2	cysteinyl-tRNA synthetase 2, mitochondrial (putative)	GO:0004817: cysteine-tRNA ligase activity, GO:0005524: ATP binding, GO:0005759: mitochondrial matrix, GO:0005829: cytosol, GO:0006418: tRNA aminoacylation for protein translation, GO:0006423: cysteinyl-tRNA aminoacylation, GO:0010467: gene expression, GO:0046872: metal ion binding	00970: Aminoacyl-tRNA biosynthesis	8.40263	8.42769	8.57998	8.62775	8.32987	8.28583	8.18631	8.16891
211	ALAS1	aminolevulinate, delta-, synthase 1	GO:0003870: 5-aminolevulinate synthase activity, GO:0005634: nucleus, GO:0005737: cytoplasm, GO:0005739: mitochondrion, GO:0005759: mitochondrial matrix, GO:0006778: porphyrin-containing compound metabolic process, GO:0006782: protoporphyrinogen IX biosynthetic process, GO:0006783: heme biosynthetic process, GO:0030170: pyridoxal phosphate binding, GO:0044255: cellular lipid metabolic process, GO…	00260: Glycine, serine and threonine metabolism, 00860: Porphyrin and chlorophyll metabolism, 01100: Metabolic pathways	7.92728	7.9779	8.12151	8.16412	7.86796	7.85903	7.80799	7.73147
25896	INTS7	integrator complex subunit 7	GO:0000077: DNA damage checkpoint, GO:0005515: protein binding, GO:0005694: chromosome, GO:0016180: snRNA processing, GO:0032039: integrator complex, GO:0071479: cellular response to ionizing radiation		7.25147	7.21377	7.71859	7.66431	6.88192	6.84882	6.63873	6.70346
112858	TP53RK	TP53 regulating kinase	GO:0002039: p53 binding, GO:0004674: protein serine/threonine kinase activity, GO:0004713: protein tyrosine kinase activity, GO:0005515: protein binding, GO:0005524: ATP binding, GO:0005634: nucleus, GO:0006468: protein phosphorylation, GO:0009103: lipopolysaccharide biosynthetic process, GO:0016020: membrane		5.6191	5.71248	6.0864	6.09693	5.54786	5.5011	5.28772	5.41445
92140	MTDH	metadherin	GO:0000122: negative regulation of transcription from RNA polymerase II promoter, GO:0001085: RNA polymerase II transcription factor binding, GO:0003713: transcription coactivator activity, GO:0005515: protein binding, GO:0005634: nucleus, GO:0005730: nucleolus, GO:0005737: cytoplasm, GO:0005783: endoplasmic reticulum, GO:0005789: endoplasmic reticulum membrane, GO:0005923: tight junction, GO:001…		8.98628	9.01717	9.18924	9.18258	8.96661	8.90806	8.84826	8.89042
56886	UGGT1	UDP-glucose glycoprotein glucosyltransferase 1	GO:0003980: UDP-glucose:glycoprotein glucosyltransferase activity, GO:0005783: endoplasmic reticulum, GO:0005788: endoplasmic reticulum lumen, GO:0005793: endoplasmic reticulum-Golgi intermediate compartment, GO:0006457: protein folding, GO:0018279: protein N-linked glycosylation via asparagine, GO:0043687: post-translational protein modification, GO:0044267: cellular protein metabolic process, G…	04141: Protein processing in endoplasmic reticulum	8.94709	8.92364	9.11078	9.10934	8.71723	8.7506	8.7517	8.74025
4860	PNP	purine nucleoside phosphorylase	GO:0001882: nucleoside binding, GO:0002060: purine nucleobase binding, GO:0004731: purine-nucleoside phosphorylase activity, GO:0004731: purine-nucleoside phosphorylase activity, GO:0005622: intracellular, GO:0005737: cytoplasm, GO:0005829: cytosol, GO:0005856: cytoskeleton, GO:0006139: nucleobase-containing compound metabolic process, GO:0006144: purine nucleobase metabolic process, GO:0006148: …	00230: Purine metabolism, 00240: Pyrimidine metabolism, 00760: Nicotinate and nicotinamide metabolism, 01100: Metabolic pathways	7.10427	7.08871	7.94322	7.88849	6.34518	6.33463	6.50803	6.56287
91607	SLFN11	schlafen family member 11	GO:0005524: ATP binding, GO:0005634: nucleus		6.69424	6.91233	7.64853	7.61069	6.01646	6.02458	6.08422	5.96928
9532	BAG2	BCL2-associated athanogene 2	GO:0006457: protein folding, GO:0019538: protein metabolic process, GO:0051087: chaperone binding	04141: Protein processing in endoplasmic reticulum	8.38071	8.48198	8.73679	8.73799	8.15275	8.10317	8.16722	8.16419
100874041	MACC1-AS1	MACC1 antisense RNA 1			1.52141	1.52398	1.68944	1.74771	1.37635	1.44363	1.38863	1.40243
6880	TAF9	TAF9 RNA polymerase II, TATA box binding protein (TBP)-associated factor, 32kDa	GO:0000125: PCAF complex, GO:0002039: p53 binding, GO:0003677: DNA binding, GO:0003713: transcription coactivator activity, GO:0003713: transcription coactivator activity, GO:0004017: adenylate kinase activity, GO:0004402: histone acetyltransferase activity, GO:0005515: protein binding, GO:0005524: ATP binding, GO:0005654: nucleoplasm, GO:0005654: nucleoplasm, GO:0005669: transcription factor TFI…	03008: Ribosome biogenesis in eukaryotes, 03022: Basal transcription factors	8.67844	8.76168	9.04476	9.10162	8.628	8.55965	8.54577	8.60818
4700	NDUFA6	NADH dehydrogenase (ubiquinone) 1 alpha subcomplex, 6, 14kDa	GO:0005743: mitochondrial inner membrane, GO:0005747: mitochondrial respiratory chain complex I, GO:0005747: mitochondrial respiratory chain complex I, GO:0006120: mitochondrial electron transport, NADH to ubiquinone, GO:0006979: response to oxidative stress, GO:0008137: NADH dehydrogenase (ubiquinone) activity, GO:0022904: respiratory electron transport chain, GO:0031966: mitochondrial membrane,…	00190: Oxidative phosphorylation, 01100: Metabolic pathways, 05010: Alzheimer's disease, 05012: Parkinson's disease, 05016: Huntington's disease	8.26429	8.31254	8.54235	8.58487	8.18337	8.10029	8.09715	8.06334
7866	IFRD2	interferon-related developmental regulator 2	GO:0003674: molecular_function, GO:0005575: cellular_component		8.4372	8.39093	8.28192	8.28378	8.20433	8.21078	7.92626	7.88901
157247	MGC27345	uncharacterized protein MGC27345			6.21026	6.15209	5.8162	5.81904	5.69184	5.73927	4.97497	4.96507
9972	NUP153	nucleoporin 153kDa	GO:0003677: DNA binding, GO:0005215: transporter activity, GO:0005515: protein binding, GO:0005643: nuclear pore, GO:0005654: nucleoplasm, GO:0005730: nucleolus, GO:0005737: cytoplasm, GO:0005975: carbohydrate metabolic process, GO:0008270: zinc ion binding, GO:0008536: Ran GTPase binding, GO:0008645: hexose transport, GO:0010827: regulation of glucose transport, GO:0015031: protein transport, GO…	03013: RNA transport	9.23433	9.17825	8.98028	8.94307	8.95956	8.96081	8.54918	8.52486
83743	GRWD1	glutamate-rich WD repeat containing 1	GO:0005634: nucleus, GO:0005730: nucleolus, GO:0005737: cytoplasm		8.34114	8.34821	8.01723	8.07384	7.85139	7.86584	7.41826	7.39812
8368	HIST1H4L	histone cluster 1, H4l		05322: Systemic lupus erythematosus	8.85691	8.8981	8.28691	8.31142	8.09618	8.13086	7.14057	7.10609
9833	MELK	maternal embryonic leucine zipper kinase	GO:0000086: G2/M transition of mitotic cell cycle, GO:0004674: protein serine/threonine kinase activity, GO:0004715: non-membrane spanning protein tyrosine kinase activity, GO:0005509: calcium ion binding, GO:0005515: protein binding, GO:0005524: ATP binding, GO:0005886: plasma membrane, GO:0005938: cell cortex, GO:0006915: apoptotic process, GO:0008283: cell proliferation, GO:0008289: lipid bind…		8.29066	8.36073	7.80213	7.80857	7.7339	7.73371	6.97309	7.001
5393	EXOSC9	exosome component 9	GO:0000175: 3'-5'-exoribonuclease activity, GO:0000176: nuclear exosome (RNase complex), GO:0000176: nuclear exosome (RNase complex), GO:0000178: exosome (RNase complex), GO:0000288: nuclear-transcribed mRNA catabolic process, deadenylation-dependent decay, GO:0000956: nuclear-transcribed mRNA catabolic process, GO:0003723: RNA binding, GO:0005634: nucleus, GO:0005730: nucleolus, GO:0005730: nucl…	03018: RNA degradation	8.06531	8.07665	7.82525	7.81185	7.69822	7.70629	7.23183	7.30254
57823	SLAMF7	SLAM family member 7	GO:0004872: receptor activity, GO:0005886: plasma membrane, GO:0007155: cell adhesion, GO:0016020: membrane, GO:0016021: integral to membrane, GO:0030101: natural killer cell activation, GO:0032814: regulation of natural killer cell activation, GO:0042267: natural killer cell mediated cytotoxicity		6.71672	6.66432	6.59917	6.54667	6.59405	6.53507	5.97417	5.81951
51373	MRPS17	mitochondrial ribosomal protein S17	GO:0003735: structural constituent of ribosome, GO:0005763: mitochondrial small ribosomal subunit, GO:0006412: translation, GO:0019843: rRNA binding		7.60054	7.4627	7.2482	7.24465	7.44088	7.34083	6.71497	6.65992
148867	SLC30A7	solute carrier family 30 (zinc transporter), member 7	GO:0000139: Golgi membrane, GO:0005794: Golgi apparatus, GO:0006829: zinc ion transport, GO:0008324: cation transmembrane transporter activity, GO:0016021: integral to membrane, GO:0016023: cytoplasmic membrane-bounded vesicle, GO:0031982: vesicle, GO:0032119: sequestering of zinc ion, GO:0044444: cytoplasmic part, GO:0048471: perinuclear region of cytoplasm, GO:0055085: transmembrane transport		8.2583	8.29257	8.02898	8.03522	8.14067	8.10049	7.32063	7.33044
337875	HIST2H2BA	histone cluster 2, H2ba (pseudogene)			10.2568	10.3143	9.83054	9.8191	10.0417	9.92517	8.92893	8.92709
11056	DDX52	DEAD (Asp-Glu-Ala-Asp) box polypeptide 52	GO:0003723: RNA binding, GO:0005524: ATP binding, GO:0005730: nucleolus, GO:0008026: ATP-dependent helicase activity		8.48243	8.48962	8.33018	8.31144	8.42033	8.37182	7.93181	7.95453
22841	RAB11FIP2	RAB11 family interacting protein 2 (class I)	GO:0005515: protein binding, GO:0005634: nucleus, GO:0005768: endosome, GO:0005886: plasma membrane, GO:0006833: water transport, GO:0015031: protein transport, GO:0019901: protein kinase binding, GO:0030010: establishment of cell polarity, GO:0030659: cytoplasmic vesicle membrane, GO:0042803: protein homodimerization activity, GO:0043231: intracellular membrane-bounded organelle, GO:0055038: rec…	04144: Endocytosis	7.51038	7.48737	7.27589	7.30301	7.40771	7.36474	6.82484	6.69988
8354	HIST1H3I	histone cluster 1, H3i		05322: Systemic lupus erythematosus	10.6288	10.5216	9.97862	9.98797	10.1608	9.98002	8.49128	8.18229
317772	HIST2H2AB	histone cluster 2, H2ab	GO:0000786: nucleosome, GO:0003677: DNA binding, GO:0005634: nucleus, GO:0006334: nucleosome assembly	05322: Systemic lupus erythematosus	9.14166	9.0595	8.7495	8.80374	8.85741	8.75217	7.78862	7.6858
8338	HIST2H2AC	histone cluster 2, H2ac	GO:0000786: nucleosome, GO:0003677: DNA binding, GO:0005634: nucleus, GO:0006334: nucleosome assembly	05322: Systemic lupus erythematosus	11.6236	11.5784	11.2317	11.3163	11.3095	11.3094	10.5602	10.4016
64430	PCNXL4	pecanex-like 4 (Drosophila)	GO:0016021: integral to membrane		8.20938	8.25061	8.01164	8.00774	8.00296	8.08256	7.52472	7.48957
5055	SERPINB2	serpin peptidase inhibitor, clade B (ovalbumin), member 2	GO:0004867: serine-type endopeptidase inhibitor activity, GO:0005576: extracellular region, GO:0005615: extracellular space, GO:0005737: cytoplasm, GO:0005794: Golgi apparatus, GO:0005886: plasma membrane, GO:0006916: anti-apoptosis, GO:0007596: blood coagulation, GO:0010951: negative regulation of endopeptidase activity, GO:0030162: regulation of proteolysis, GO:0042730: fibrinolysis	05146: Amoebiasis	11.4833	11.4355	11.0193	11.0146	11.0565	11.1026	10.1065	10.0424
51491	NOP16	NOP16 nucleolar protein homolog (yeast)	GO:0005634: nucleus, GO:0005730: nucleolus, GO:0043231: intracellular membrane-bounded organelle		8.20036	8.22975	7.94911	8.07521	8.02533	7.95371	7.33216	7.39561
81034	SLC25A32	solute carrier family 25 (mitochondrial folate carrier) , member 32	GO:0005743: mitochondrial inner membrane, GO:0005743: mitochondrial inner membrane, GO:0006766: vitamin metabolic process, GO:0006767: water-soluble vitamin metabolic process, GO:0006839: mitochondrial transport, GO:0008517: folic acid transporter activity, GO:0015884: folic acid transport, GO:0016021: integral to membrane, GO:0044281: small molecule metabolic process, GO:0046655: folic acid meta…		8.24747	8.22431	7.957	8.05123	8.03863	8.03671	7.43448	7.43857
4154	MBNL1	muscleblind-like splicing regulator 1	GO:0000381: regulation of alternative nuclear mRNA splicing, via spliceosome, GO:0001701: in utero embryonic development, GO:0003723: RNA binding, GO:0003725: double-stranded RNA binding, GO:0005515: protein binding, GO:0005634: nucleus, GO:0005737: cytoplasm, GO:0006376: mRNA splice site selection, GO:0007399: nervous system development, GO:0007519: skeletal muscle tissue development, GO:0008270…		10.1521	10.1721	10.1022	10.082	9.93813	9.95303	9.6893	9.68127
51602	NOP58	NOP58 ribonucleoprotein homolog (yeast)	GO:0005515: protein binding, GO:0005634: nucleus, GO:0005730: nucleolus, GO:0005730: nucleolus, GO:0005732: small nucleolar ribonucleoprotein complex, GO:0005737: cytoplasm, GO:0006364: rRNA processing, GO:0006608: snRNP protein import into nucleus, GO:0015030: Cajal body, GO:0016049: cell growth, GO:0030515: snoRNA binding, GO:0031428: box C/D snoRNP complex, GO:0070761: pre-snoRNP complex	03008: Ribosome biogenesis in eukaryotes	10.4127	10.4437	10.4008	10.3912	10.2431	10.2739	10.0082	10.0055
5889	RAD51C	RAD51 homolog C (S. cerevisiae)	GO:0003677: DNA binding, GO:0005515: protein binding, GO:0005524: ATP binding, GO:0005634: nucleus, GO:0005654: nucleoplasm, GO:0005737: cytoplasm, GO:0005739: mitochondrion, GO:0006281: DNA repair, GO:0006310: DNA recombination, GO:0007062: sister chromatid cohesion, GO:0007066: female meiosis sister chromatid cohesion, GO:0007131: reciprocal meiotic recombination, GO:0007141: male meiosis I, GO…	03440: Homologous recombination	8.18276	8.26733	8.0422	8.11631	7.79985	7.76024	7.29302	7.28094
79959	CEP76	centrosomal protein 76kDa	GO:0000086: G2/M transition of mitotic cell cycle, GO:0000278: mitotic cell cycle, GO:0005515: protein binding, GO:0005813: centrosome, GO:0005814: centriole, GO:0005829: cytosol, GO:0046599: regulation of centriole replication		5.25231	5.17897	5.02795	4.99354	4.7228	4.73131	4.14196	4.12656
54865	GPATCH4	G patch domain containing 4	GO:0003676: nucleic acid binding		8.21016	8.28758	8.19222	8.21345	7.97253	7.94395	7.34527	7.41698
55161	TMEM33	transmembrane protein 33	GO:0008150: biological_process, GO:0016021: integral to membrane, GO:0042470: melanosome		7.92115	7.99627	7.97688	7.96164	7.75613	7.80461	7.37128	7.35724
5725	PTBP1	polypyrimidine tract binding protein 1	GO:0000166: nucleotide binding, GO:0000381: regulation of alternative nuclear mRNA splicing, via spliceosome, GO:0000398: nuclear mRNA splicing, via spliceosome, GO:0003723: RNA binding, GO:0005515: protein binding, GO:0005654: nucleoplasm, GO:0005730: nucleolus, GO:0006397: mRNA processing, GO:0008187: poly-pyrimidine tract binding, GO:0008380: RNA splicing, GO:0010467: gene expression, GO:00305…		10.9641	10.9956	11	11.0217	10.8535	10.8601	10.626	10.6748
8364	HIST1H4C	histone cluster 1, H4c		05322: Systemic lupus erythematosus	10.9807	11.1413	10.9362	10.9868	10.8426	10.9237	10.2204	10.2058
91782	CHMP7	charged multivesicular body protein 7	GO:0000815: ESCRT III complex, GO:0005634: nucleus, GO:0005737: cytoplasm, GO:0005829: cytosol, GO:0008565: protein transporter activity, GO:0015031: protein transport, GO:0016044: cellular membrane organization, GO:0016197: endosomal transport, GO:0045324: late endosome to vacuole transport		7.56222	7.52855	7.47788	7.45971	7.39367	7.46849	7.05401	7.07681
112479	ERI2	ERI1 exoribonuclease family member 2	GO:0003676: nucleic acid binding, GO:0004527: exonuclease activity, GO:0005622: intracellular, GO:0008270: zinc ion binding		5.58804	5.60125	5.39786	5.46469	5.08711	5.22121	4.39618	4.37025
262	AMD1	adenosylmethionine decarboxylase 1	GO:0004014: adenosylmethionine decarboxylase activity, GO:0005829: cytosol, GO:0006557: S-adenosylmethioninamine biosynthetic process, GO:0006595: polyamine metabolic process, GO:0006597: spermine biosynthetic process, GO:0008295: spermidine biosynthetic process, GO:0034641: cellular nitrogen compound metabolic process, GO:0044281: small molecule metabolic process	00270: Cysteine and methionine metabolism, 00330: Arginine and proline metabolism, 01100: Metabolic pathways	8.92755	8.97505	8.83664	8.8865	8.69357	8.80507	8.35694	8.30479
84259	DCUN1D5	DCN1, defective in cullin neddylation 1, domain containing 5 (S. cerevisiae)	GO:0003674: molecular_function, GO:0005575: cellular_component, GO:0008150: biological_process		7.91858	7.9638	7.89143	7.89491	7.83788	7.82122	7.61195	7.58132
84942	WDR73	WD repeat domain 73			6.91838	6.92729	6.81889	6.92811	6.79741	6.79337	6.48747	6.44303
3454	IFNAR1	interferon (alpha, beta and omega) receptor 1	GO:0004905: type I interferon receptor activity, GO:0005886: plasma membrane, GO:0005887: integral to plasma membrane, GO:0007166: cell surface receptor signaling pathway, GO:0007259: JAK-STAT cascade, GO:0009615: response to virus, GO:0019221: cytokine-mediated signaling pathway, GO:0032729: positive regulation of interferon-gamma production, GO:0042110: T cell activation, GO:0045351: type I int…	04060: Cytokine-cytokine receptor interaction, 04380: Osteoclast differentiation, 04620: Toll-like receptor signaling pathway, 04630: Jak-STAT signaling pathway, 04650: Natural killer cell mediated cytotoxicity, 05160: Hepatitis C	8.28448	8.24936	8.17551	8.26464	8.11693	8.06537	7.7488	7.71557
85465	EPT1	ethanolaminephosphotransferase 1 (CDP-ethanolamine-specific)	GO:0004307: ethanolaminephosphotransferase activity, GO:0006646: phosphatidylethanolamine biosynthetic process, GO:0016021: integral to membrane, GO:0046872: metal ion binding	00564: Glycerophospholipid metabolism, 00565: Ether lipid metabolism, 01100: Metabolic pathways	7.02933	7.05896	7.11147	7.13758	6.68567	6.57774	6.36494	6.33246
57697	FANCM	Fanconi anemia, complementation group M	GO:0000712: resolution of meiotic recombination intermediates, GO:0003677: DNA binding, GO:0003682: chromatin binding, GO:0004518: nuclease activity, GO:0005515: protein binding, GO:0005524: ATP binding, GO:0005654: nucleoplasm, GO:0006281: DNA repair, GO:0008026: ATP-dependent helicase activity, GO:0031297: replication fork processing, GO:0043240: Fanconi anaemia nuclear complex, GO:0071821: FAN…		5.23738	5.30062	5.27284	5.25417	4.7259	4.65976	4.20732	4.21332
80020	FOXRED2	FAD-dependent oxidoreductase domain containing 2	GO:0005515: protein binding, GO:0005788: endoplasmic reticulum lumen, GO:0016491: oxidoreductase activity, GO:0030433: ER-associated protein catabolic process, GO:0050660: flavin adenine dinucleotide binding		6.35636	6.3343	6.2898	6.25606	5.84511	5.87218	5.58751	5.57797
220042	C11orf82	chromosome 11 open reading frame 82	GO:0005634: nucleus, GO:0005737: cytoplasm, GO:0006915: apoptotic process, GO:0007050: cell cycle arrest		7.52787	7.52355	7.46052	7.55576	6.91768	6.86358	6.48453	6.52836
157570	ESCO2	establishment of cohesion 1 homolog 2 (S. cerevisiae)	GO:0000785: chromatin, GO:0005634: nucleus, GO:0006275: regulation of DNA replication, GO:0007049: cell cycle, GO:0016746: transferase activity, transferring acyl groups, GO:0034421: post-translational protein acetylation, GO:0046872: metal ion binding		9.25682	9.3017	9.27901	9.22948	8.05683	8.00886	7.41777	7.49295
113130	CDCA5	cell division cycle associated 5	GO:0000082: G1/S transition of mitotic cell cycle, GO:0000790: nuclear chromatin, GO:0003682: chromatin binding, GO:0005515: protein binding, GO:0005634: nucleus, GO:0005634: nucleus, GO:0005737: cytoplasm, GO:0005886: plasma membrane, GO:0006302: double-strand break repair, GO:0007064: mitotic sister chromatid cohesion, GO:0007067: mitosis, GO:0007076: mitotic chromosome condensation, GO:0007080…		8.66796	8.62815	8.5986	8.62899	8.0463	7.97577	7.73559	7.69959
117246	FTSJ3	FtsJ homolog 3 (E. coli)	GO:0001510: RNA methylation, GO:0003676: nucleic acid binding, GO:0005730: nucleolus, GO:0006364: rRNA processing, GO:0008168: methyltransferase activity		8.48072	8.48464	8.32296	8.4031	7.94905	7.94583	7.55062	7.52971
10714	POLD3	polymerase (DNA-directed), delta 3, accessory subunit	GO:0000084: S phase of mitotic cell cycle, GO:0000278: mitotic cell cycle, GO:0000722: telomere maintenance via recombination, GO:0000723: telomere maintenance, GO:0000731: DNA synthesis involved in DNA repair, GO:0003887: DNA-directed DNA polymerase activity, GO:0005515: protein binding, GO:0005634: nucleus, GO:0005654: nucleoplasm, GO:0005739: mitochondrion, GO:0006271: DNA strand elongation in…	00230: Purine metabolism, 00240: Pyrimidine metabolism, 01100: Metabolic pathways, 03030: DNA replication, 03410: Base excision repair, 03420: Nucleotide excision repair, 03430: Mismatch repair, 03440: Homologous recombination	8.69547	8.77634	8.64457	8.7087	8.15388	8.16356	7.77811	7.68422
9918	NCAPD2	non-SMC condensin I complex, subunit D2	GO:0000228: nuclear chromosome, GO:0000793: condensed chromosome, GO:0000796: condensin complex, GO:0000797: condensin core heterodimer, GO:0005515: protein binding, GO:0005634: nucleus, GO:0005634: nucleus, GO:0005737: cytoplasm, GO:0005737: cytoplasm, GO:0007076: mitotic chromosome condensation, GO:0007076: mitotic chromosome condensation, GO:0042393: histone binding, GO:0042393: histone bindin…		9.19869	9.14462	8.5059	8.44072	8.43956	8.55782	8.26792	8.2042
55143	CDCA8	cell division cycle associated 8	GO:0000087: M phase of mitotic cell cycle, GO:0000089: mitotic metaphase, GO:0000236: mitotic prometaphase, GO:0000278: mitotic cell cycle, GO:0000775: chromosome, centromeric region, GO:0005515: protein binding, GO:0005634: nucleus, GO:0005730: nucleolus, GO:0005737: cytoplasm, GO:0005819: spindle, GO:0005829: cytosol, GO:0032133: chromosome passenger complex, GO:0043234: protein complex, GO:005…		8.25797	8.29998	7.20812	7.13019	7.35391	7.29662	6.80338	6.79186
9700	ESPL1	extra spindle pole bodies homolog 1 (S. cerevisiae)	GO:0000070: mitotic sister chromatid segregation, GO:0000212: meiotic spindle organization, GO:0000910: cytokinesis, GO:0003824: catalytic activity, GO:0005515: protein binding, GO:0005634: nucleus, GO:0005813: centrosome, GO:0006508: proteolysis, GO:0006915: apoptotic process, GO:0008152: metabolic process, GO:0008234: cysteine-type peptidase activity, GO:0040001: establishment of mitotic spindl…	04110: Cell cycle, 04114: Oocyte meiosis	6.77733	6.66403	5.47554	5.46437	5.73084	5.58701	5.05752	4.95989
8907	AP1M1	adaptor-related protein complex 1, mu 1 subunit	GO:0000139: Golgi membrane, GO:0005515: protein binding, GO:0005765: lysosomal membrane, GO:0005829: cytosol, GO:0006886: intracellular protein transport, GO:0006892: post-Golgi vesicle-mediated transport, GO:0016032: viral reproduction, GO:0016044: cellular membrane organization, GO:0030131: clathrin adaptor complex, GO:0030659: cytoplasmic vesicle membrane, GO:0030665: clathrin coated vesicle m…	04142: Lysosome	8.04372	8.05369	7.70319	7.76663	7.71931	7.72308	7.66159	7.60036
116840	CNTROB	centrobin, centrosomal BRCA2 interacting protein	GO:0000910: cytokinesis, GO:0005515: protein binding, GO:0005737: cytoplasm, GO:0005813: centrosome, GO:0005814: centriole, GO:0007099: centriole replication, GO:0019904: protein domain specific binding, GO:0051299: centrosome separation		6.73472	6.6563	6.10947	6.18046	6.20359	6.18981	6.06076	6.01903
51512	GTSE1	G-2 and S-phase expressed 1	GO:0000085: G2 phase of mitotic cell cycle, GO:0003674: molecular_function, GO:0005881: cytoplasmic microtubule, GO:0006977: DNA damage response, signal transduction by p53 class mediator resulting in cell cycle arrest, GO:0007017: microtubule-based process	04115: p53 signaling pathway	7.73529	7.76854	6.82862	6.74934	6.80432	6.58271	6.45465	6.43718
55236	UBA6	ubiquitin-like modifier activating enzyme 6	GO:0005515: protein binding, GO:0005524: ATP binding, GO:0005737: cytoplasm, GO:0006511: ubiquitin-dependent protein catabolic process, GO:0016567: protein ubiquitination, GO:0016567: protein ubiquitination, GO:0016874: ligase activity, GO:0019780: FAT10 activating enzyme activity	04120: Ubiquitin mediated proteolysis	8.98717	8.97759	8.74733	8.74909	8.7535	8.70254	8.61672	8.61919
22974	TPX2	TPX2, microtubule-associated, homolog (Xenopus laevis)	GO:0000922: spindle pole, GO:0005515: protein binding, GO:0005524: ATP binding, GO:0005525: GTP binding, GO:0005634: nucleus, GO:0005737: cytoplasm, GO:0005819: spindle, GO:0005874: microtubule, GO:0006915: apoptotic process, GO:0007067: mitosis, GO:0008283: cell proliferation, GO:0015630: microtubule cytoskeleton, GO:0019901: protein kinase binding, GO:0032147: activation of protein kinase activ…		9.92289	9.95373	9.31554	9.32997	9.17792	9.25054	8.81577	8.88096
121504	HIST4H4	histone cluster 4, H4		05322: Systemic lupus erythematosus	9.25784	9.31445	8.39384	8.44556	8.38715	8.37182	7.81018	7.85967
9585	KIF20B	kinesin family member 20B	GO:0000087: M phase of mitotic cell cycle, GO:0003777: microtubule motor activity, GO:0005524: ATP binding, GO:0005654: nucleoplasm, GO:0005730: nucleolus, GO:0005813: centrosome, GO:0005819: spindle, GO:0005874: microtubule, GO:0006200: ATP catabolic process, GO:0007018: microtubule-based movement, GO:0007050: cell cycle arrest, GO:0007067: mitosis, GO:0007088: regulation of mitosis, GO:0016887:…		9.05012	9.05599	8.11989	8.04697	8.09462	8.09241	7.33312	7.35057
891	CCNB1	cyclin B1	GO:0000075: cell cycle checkpoint, GO:0000079: regulation of cyclin-dependent protein kinase activity, GO:0000082: G1/S transition of mitotic cell cycle, GO:0000086: G2/M transition of mitotic cell cycle, GO:0000086: G2/M transition of mitotic cell cycle, GO:0000236: mitotic prometaphase, GO:0000278: mitotic cell cycle, GO:0000922: spindle pole, GO:0000942: condensed nuclear chromosome outer kine…	04110: Cell cycle, 04114: Oocyte meiosis, 04115: p53 signaling pathway, 04914: Progesterone-mediated oocyte maturation	8.69989	8.7435	7.86834	7.82493	7.9409	7.92975	7.33054	7.45046
79866	BORA	bora, aurora kinase A activator	GO:0005515: protein binding, GO:0007067: mitosis, GO:0007088: regulation of mitosis, GO:0019901: protein kinase binding, GO:0032880: regulation of protein localization, GO:0051301: cell division, GO:0060236: regulation of mitotic spindle organization		6.35292	6.38431	5.28166	5.31482	5.46989	5.3569	4.69375	4.78202
100128191	TMPO-AS1	TMPO antisense RNA 1			6.37683	6.39363	5.60784	5.62542	5.32133	5.35953	4.91769	5.00973
259266	ASPM	asp (abnormal spindle) homolog, microcephaly associated (Drosophila)	GO:0000922: spindle pole, GO:0005516: calmodulin binding, GO:0005634: nucleus, GO:0005737: cytoplasm, GO:0007067: mitosis, GO:0021873: forebrain neuroblast division, GO:0045665: negative regulation of neuron differentiation, GO:0045769: negative regulation of asymmetric cell division, GO:0051661: maintenance of centrosome location		8.97403	9.04221	8.14186	8.13954	7.92976	7.8649	7.46272	7.48324
2491	CENPI	centromere protein I	GO:0000087: M phase of mitotic cell cycle, GO:0000236: mitotic prometaphase, GO:0000278: mitotic cell cycle, GO:0000776: kinetochore, GO:0005515: protein binding, GO:0005654: nucleoplasm, GO:0005829: cytosol, GO:0006334: nucleosome assembly, GO:0007548: sex differentiation, GO:0034080: CenH3-containing nucleosome assembly at centromere, GO:0042699: follicle-stimulating hormone signaling pathway		8.77463	8.79037	7.94374	8.01388	7.61067	7.7154	7.15266	7.16728
11190	CEP250	centrosomal protein 250kDa	GO:0000086: G2/M transition of mitotic cell cycle, GO:0000278: mitotic cell cycle, GO:0000278: mitotic cell cycle, GO:0005515: protein binding, GO:0005813: centrosome, GO:0005814: centriole, GO:0005815: microtubule organizing center, GO:0005829: cytosol, GO:0005929: cilium, GO:0005932: microtubule basal body, GO:0008022: protein C-terminus binding, GO:0008104: protein localization, GO:0010457: ce…		6.63521	6.67149	6.06232	6.12731	5.81306	5.82801	5.54338	5.52829
1063	CENPF	centromere protein F, 350/400kDa (mitosin)	GO:0000085: G2 phase of mitotic cell cycle, GO:0000087: M phase of mitotic cell cycle, GO:0000087: M phase of mitotic cell cycle, GO:0000087: M phase of mitotic cell cycle, GO:0000236: mitotic prometaphase, GO:0000278: mitotic cell cycle, GO:0000278: mitotic cell cycle, GO:0000775: chromosome, centromeric region, GO:0000776: kinetochore, GO:0000785: chromatin, GO:0000922: spindle pole, GO:0000940…		9.37523	9.27926	8.55467	8.69767	8.40155	8.4464	8.37963	8.29759
83461	CDCA3	cell division cycle associated 3	GO:0003674: molecular_function, GO:0005575: cellular_component, GO:0005829: cytosol, GO:0007067: mitosis, GO:0008150: biological_process, GO:0016567: protein ubiquitination, GO:0051301: cell division		8.3893	8.47578	7.49078	7.49993	7.23565	7.17645	7.06235	7.00226
9212	AURKB	aurora kinase B	GO:0000087: M phase of mitotic cell cycle, GO:0000122: negative regulation of transcription from RNA polymerase II promoter, GO:0000236: mitotic prometaphase, GO:0000278: mitotic cell cycle, GO:0000779: condensed chromosome, centromeric region, GO:0000780: condensed nuclear chromosome, centromeric region, GO:0000910: cytokinesis, GO:0002903: negative regulation of B cell apoptotic process, GO:000…		8.87331	8.85132	8.16565	8.16441	8.03257	8.01442	7.93789	7.92243
2956	MSH6	mutS homolog 6 (E. coli)	GO:0000228: nuclear chromosome, GO:0000287: magnesium ion binding, GO:0000400: four-way junction DNA binding, GO:0000710: meiotic mismatch repair, GO:0000710: meiotic mismatch repair, GO:0000790: nuclear chromatin, GO:0003682: chromatin binding, GO:0003690: double-stranded DNA binding, GO:0005515: protein binding, GO:0005524: ATP binding, GO:0006200: ATP catabolic process, GO:0006281: DNA repair,…	03430: Mismatch repair, 05200: Pathways in cancer, 05210: Colorectal cancer	7.51723	7.49767	7.16918	7.12534	6.98652	7.03199	6.89783	6.86878
4998	ORC1	origin recognition complex, subunit 1	GO:0000075: cell cycle checkpoint, GO:0000082: G1/S transition of mitotic cell cycle, GO:0000083: regulation of transcription involved in G1/S phase of mitotic cell cycle, GO:0000084: S phase of mitotic cell cycle, GO:0000216: M/G1 transition of mitotic cell cycle, GO:0000278: mitotic cell cycle, GO:0000808: origin recognition complex, GO:0003677: DNA binding, GO:0005515: protein binding, GO:0005…	04110: Cell cycle	6.89596	6.92126	6.15928	6.19291	5.84339	5.95594	5.79482	5.7682
10112	KIF20A	kinesin family member 20A	GO:0000087: M phase of mitotic cell cycle, GO:0000278: mitotic cell cycle, GO:0000910: cytokinesis, GO:0000910: cytokinesis, GO:0001578: microtubule bundle formation, GO:0003777: microtubule motor activity, GO:0005215: transporter activity, GO:0005524: ATP binding, GO:0005654: nucleoplasm, GO:0005794: Golgi apparatus, GO:0005819: spindle, GO:0005874: microtubule, GO:0007018: microtubule-based mov…		9.76515	9.84106	9.04859	9.06054	8.69799	8.62646	8.50191	8.50647
23511	NUP188	nucleoporin 188kDa	GO:0005635: nuclear envelope, GO:0005643: nuclear pore, GO:0005975: carbohydrate metabolic process, GO:0008645: hexose transport, GO:0010827: regulation of glucose transport, GO:0015031: protein transport, GO:0015758: glucose transport, GO:0016032: viral reproduction, GO:0019221: cytokine-mediated signaling pathway, GO:0044281: small molecule metabolic process, GO:0051028: mRNA transport, GO:0055…	03013: RNA transport	8.60751	8.61979	8.44721	8.41202	7.74723	7.80621	7.92844	7.84426
400550	FOXF1-AS1	FOXF1 antisense RNA 1 (head to head)			6.19854	6.19391	5.48062	5.64344	4.6819	4.615	4.60956	4.63893
2305	FOXM1	forkhead box M1	GO:0000086: G2/M transition of mitotic cell cycle, GO:0000122: negative regulation of transcription from RNA polymerase II promoter, GO:0001558: regulation of cell growth, GO:0001570: vasculogenesis, GO:0001889: liver development, GO:0003677: DNA binding, GO:0003677: DNA binding, GO:0003690: double-stranded DNA binding, GO:0003700: sequence-specific DNA binding transcription factor activity, GO:0…		9.30274	9.28754	9.00321	9.10445	8.60301	8.59496	8.64948	8.64869
11113	CIT	citron (rho-interacting, serine/threonine kinase 21)	GO:0004674: protein serine/threonine kinase activity, GO:0005083: small GTPase regulator activity, GO:0005524: ATP binding, GO:0005543: phospholipid binding, GO:0005737: cytoplasm, GO:0007067: mitosis, GO:0017124: SH3 domain binding, GO:0033205: cell cycle cytokinesis, GO:0035556: intracellular signal transduction, GO:0046872: metal ion binding, GO:0048699: generation of neurons		8.4139	8.4359	8.01665	7.88459	7.65346	7.66753	7.61443	7.55023
2201	FBN2	fibrillin 2	GO:0001527: microfibril, GO:0005201: extracellular matrix structural constituent, GO:0005509: calcium ion binding, GO:0005578: proteinaceous extracellular matrix, GO:0009653: anatomical structure morphogenesis, GO:0030326: embryonic limb morphogenesis, GO:0030501: positive regulation of bone mineralization, GO:0035583: sequestering of TGFbeta in extracellular matrix, GO:0045669: positive regulati…		8.06831	8.04686	7.76672	7.66558	7.44525	7.42012	7.37707	7.4222
128239	IQGAP3	IQ motif containing GTPase activating protein 3	GO:0000082: G1/S transition of mitotic cell cycle, GO:0000187: activation of MAPK activity, GO:0005099: Ras GTPase activator activity, GO:0005516: calmodulin binding, GO:0005737: cytoplasm, GO:0005911: cell-cell junction, GO:0007265: Ras protein signal transduction, GO:0008361: regulation of cell size, GO:0010628: positive regulation of gene expression, GO:0010629: negative regulation of gene exp…	04810: Regulation of actin cytoskeleton	7.51152	7.45257	7.0732	7.065	6.72387	6.6176	6.71107	6.66845
90381	TICRR	TOPBP1-interacting checkpoint and replication regulator	GO:0001731: formation of translation preinitiation complex, GO:0003682: chromatin binding, GO:0005515: protein binding, GO:0005634: nucleus, GO:0006260: DNA replication, GO:0006281: DNA repair, GO:0007049: cell cycle, GO:0010212: response to ionizing radiation, GO:0030174: regulation of DNA-dependent DNA replication initiation, GO:0031576: G2/M transition checkpoint, GO:0033314: mitotic cell cycl…		7.08163	6.98271	6.42793	6.36367	5.90277	5.83678	5.90257	5.70758
55872	PBK	PDZ binding kinase	GO:0004674: protein serine/threonine kinase activity, GO:0005515: protein binding, GO:0005524: ATP binding, GO:0005575: cellular_component, GO:0006468: protein phosphorylation, GO:0007067: mitosis		8.5208	8.51349	7.98395	7.99511	7.29824	7.27578	6.97025	6.97922
1004	CDH6	cadherin 6, type 2, K-cadherin (fetal kidney)	GO:0005509: calcium ion binding, GO:0005634: nucleus, GO:0005737: cytoplasm, GO:0005886: plasma membrane, GO:0005886: plasma membrane, GO:0007155: cell adhesion, GO:0007156: homophilic cell adhesion, GO:0016021: integral to membrane, GO:0034329: cell junction assembly, GO:0034332: adherens junction organization, GO:0045216: cell-cell junction organization		8.05439	7.98912	7.4603	7.33719	6.92598	6.81959	7.07104	7.0696
23636	NUP62	nucleoporin 62kDa	GO:0000922: spindle pole, GO:0003682: chromatin binding, GO:0005487: nucleocytoplasmic transporter activity, GO:0005515: protein binding, GO:0005635: nuclear envelope, GO:0005635: nuclear envelope, GO:0005643: nuclear pore, GO:0005643: nuclear pore, GO:0005737: cytoplasm, GO:0005975: carbohydrate metabolic process, GO:0006351: transcription, DNA-dependent, GO:0006351: transcription, DNA-dependent…	03013: RNA transport	8.78349	8.8316	8.63606	8.63835	8.54832	8.53047	8.51102	8.55036
118987	PDZD8	PDZ domain containing 8	GO:0005622: intracellular, GO:0007010: cytoskeleton organization, GO:0022604: regulation of cell morphogenesis, GO:0035556: intracellular signal transduction, GO:0044419: interspecies interaction between organisms, GO:0046872: metal ion binding		8.17054	8.12678	8.52359	8.43335	8.28677	8.35142	8.33542	8.26326
58505	OSTC	oligosaccharyltransferase complex subunit	GO:0004579: dolichyl-diphosphooligosaccharide-protein glycotransferase activity, GO:0008250: oligosaccharyltransferase complex, GO:0016021: integral to membrane, GO:0018279: protein N-linked glycosylation via asparagine		8.59321	8.59787	8.97115	8.89807	8.80422	8.81374	8.82165	8.78
1038	CDR1	cerebellar degeneration-related protein 1, 34kDa			5.35538	5.30331	6.40935	6.26189	5.91827	5.87728	5.98648	5.90253
84270	C9orf89	chromosome 9 open reading frame 89	GO:0005634: nucleus, GO:0005829: cytosol, GO:0043124: negative regulation of I-kappaB kinase/NF-kappaB cascade, GO:0050700: CARD domain binding		6.50124	6.47162	6.95485	6.85337	6.71485	6.72533	6.8309	6.71866
7844	RNF103	ring finger protein 103	GO:0004842: ubiquitin-protein ligase activity, GO:0005515: protein binding, GO:0005783: endoplasmic reticulum, GO:0005789: endoplasmic reticulum membrane, GO:0007417: central nervous system development, GO:0008270: zinc ion binding, GO:0016021: integral to membrane, GO:0016567: protein ubiquitination, GO:0030433: ER-associated protein catabolic process		4.63703	4.59991	5.38144	5.24642	5.09859	5.16199	5.13267	4.86034
693135	MIR551A	microRNA 551a			2.16366	2.18545	2.62417	2.55058	2.45786	2.53754	2.49906	2.4172
3998	LMAN1	lectin, mannose-binding, 1	GO:0000139: Golgi membrane, GO:0005515: protein binding, GO:0005537: mannose binding, GO:0005789: endoplasmic reticulum membrane, GO:0005793: endoplasmic reticulum-Golgi intermediate compartment, GO:0006457: protein folding, GO:0006888: ER to Golgi vesicle-mediated transport, GO:0007030: Golgi organization, GO:0007596: blood coagulation, GO:0010638: positive regulation of organelle organization, …	04141: Protein processing in endoplasmic reticulum	9.38216	9.4021	9.5361	9.56504	9.45405	9.47398	9.46171	9.45655
337967	KRTAP6-2	keratin associated protein 6-2	GO:0005882: intermediate filament		3.1836	3.19531	4.03393	4.23064	3.68048	3.8691	3.68022	3.47671
253959	RALGAPA1	Ral GTPase activating protein, alpha subunit 1 (catalytic)	GO:0005096: GTPase activator activity, GO:0005634: nucleus, GO:0005634: nucleus, GO:0005737: cytoplasm, GO:0005737: cytoplasm, GO:0005739: mitochondrion, GO:0005829: cytosol, GO:0017123: Ral GTPase activator activity, GO:0032859: activation of Ral GTPase activity, GO:0043547: positive regulation of GTPase activity, GO:0046982: protein heterodimerization activity		6.44441	6.37637	6.63391	6.71266	6.54386	6.53863	6.54263	6.52293
201931	TMEM192	transmembrane protein 192	GO:0005765: lysosomal membrane, GO:0005770: late endosome, GO:0016021: integral to membrane		6.60159	6.70246	7.24681	7.24277	7.03538	7.00368	6.9425	6.98083
7675	ZNF121	zinc finger protein 121	GO:0003677: DNA binding, GO:0005634: nucleus, GO:0006351: transcription, DNA-dependent, GO:0006355: regulation of transcription, DNA-dependent, GO:0008270: zinc ion binding		7.76952	7.86245	8.33335	8.29833	8.1515	8.04304	8.14647	8.0519
8273	SLC10A3	solute carrier family 10 (sodium/bile acid cotransporter family), member 3	GO:0006814: sodium ion transport, GO:0008508: bile acid:sodium symporter activity, GO:0015711: organic anion transport, GO:0016021: integral to membrane, GO:0032526: response to retinoic acid		7.62718	7.63156	7.79249	7.79943	7.73255	7.69219	7.69174	7.69986
1051	CEBPB	CCAAT/enhancer binding protein (C/EBP), beta	GO:0000790: nuclear chromatin, GO:0001077: RNA polymerase II core promoter proximal region sequence-specific DNA binding transcription factor activity involved in positive regulation of transcription, GO:0001892: embryonic placenta development, GO:0003677: DNA binding, GO:0003700: sequence-specific DNA binding transcription factor activity, GO:0003705: RNA polymerase II distal enhancer sequence-s…		6.40795	6.45032	6.82905	6.91136	6.68932	6.6538	6.67273	6.63395
55819	RNF130	ring finger protein 130	GO:0004842: ubiquitin-protein ligase activity, GO:0005634: nucleus, GO:0005737: cytoplasm, GO:0006915: apoptotic process, GO:0008270: zinc ion binding, GO:0012501: programmed cell death, GO:0016021: integral to membrane, GO:0016567: protein ubiquitination		8.51791	8.55027	8.77281	8.79568	8.69833	8.63306	8.67177	8.63841
3572	IL6ST	interleukin 6 signal transducer (gp130, oncostatin M receptor)	GO:0002675: positive regulation of acute inflammatory response, GO:0002821: positive regulation of adaptive immune response, GO:0004897: ciliary neurotrophic factor receptor activity, GO:0004915: interleukin-6 receptor activity, GO:0004915: interleukin-6 receptor activity, GO:0004921: interleukin-11 receptor activity, GO:0004923: leukemia inhibitory factor receptor activity, GO:0004924: oncostati…	04060: Cytokine-cytokine receptor interaction, 04630: Jak-STAT signaling pathway	10.2844	10.2884	10.6083	10.5596	10.5251	10.5857	10.4856	10.5208
6509	SLC1A4	solute carrier family 1 (glutamate/neutral amino acid transporter), member 4	GO:0005254: chloride channel activity, GO:0005882: intermediate filament, GO:0005886: plasma membrane, GO:0005887: integral to plasma membrane, GO:0006811: ion transport, GO:0006821: chloride transport, GO:0006865: amino acid transport, GO:0006868: glutamine transport, GO:0015180: L-alanine transmembrane transporter activity, GO:0015184: L-cystine transmembrane transporter activity, GO:0015186: L…		6.7591	6.85132	7.46685	7.452	7.3231	7.4044	7.15606	7.18929
10288	LILRB2	leukocyte immunoglobulin-like receptor, subfamily B (with TM and ITIM domains), member 2	GO:0002578: negative regulation of antigen processing and presentation, GO:0002666: positive regulation of T cell tolerance induction, GO:0002767: immune response-inhibiting cell surface receptor signaling pathway, GO:0002767: immune response-inhibiting cell surface receptor signaling pathway, GO:0002774: Fc receptor mediated inhibitory signaling pathway, GO:0004872: receptor activity, GO:0005515…	04380: Osteoclast differentiation	2.81729	2.51772	4.2073	4.31605	3.366	3.98822	3.61935	3.51957
482	ATP1B2	ATPase, Na+/K+ transporting, beta 2 polypeptide	GO:0005391: sodium:potassium-exchanging ATPase activity, GO:0005515: protein binding, GO:0005737: cytoplasm, GO:0005886: plasma membrane, GO:0006810: transport, GO:0007596: blood coagulation, GO:0016021: integral to membrane, GO:0034220: ion transmembrane transport, GO:0050900: leukocyte migration, GO:0055085: transmembrane transport	04260: Cardiac muscle contraction, 04960: Aldosterone-regulated sodium reabsorption, 04964: Proximal tubule bicarbonate reclamation, 04970: Salivary secretion, 04971: Gastric acid secretion, 04972: Pancreatic secretion, 04973: Carbohydrate digestion and absorption, 04974: Protein digestion and absorption, 04976: Bile secretion	4.09283	4.00608	4.64238	4.55607	4.34593	4.45285	4.26619	4.38191
10724	MGEA5	meningioma expressed antigen 5 (hyaluronidase)	GO:0004402: histone acetyltransferase activity, GO:0004415: hyalurononglucosaminidase activity, GO:0005634: nucleus, GO:0005737: cytoplasm, GO:0006044: N-acetylglucosamine metabolic process, GO:0006516: glycoprotein catabolic process, GO:0006612: protein targeting to membrane, GO:0007568: aging, GO:0010524: positive regulation of calcium ion transport into cytosol, GO:0010616: negative regulation…		8.65197	8.74698	8.96744	9.04604	8.90211	8.94074	8.89982	8.8897
3475	IFRD1	interferon-related developmental regulator 1	GO:0005634: nucleus, GO:0007275: multicellular organismal development, GO:0007518: myoblast cell fate determination, GO:0007527: adult somatic muscle development		8.16634	8.3651	8.84211	9.01491	8.68398	8.75963	8.6857	8.75572
154043	CNKSR3	CNKSR family member 3	GO:0005737: cytoplasm, GO:0010765: positive regulation of sodium ion transport, GO:0016020: membrane, GO:0033137: negative regulation of peptidyl-serine phosphorylation, GO:0070373: negative regulation of ERK1 and ERK2 cascade		5.05203	5.13	5.41515	5.48592	5.29633	5.32634	5.30726	5.36882
1647	GADD45A	growth arrest and DNA-damage-inducible, alpha	GO:0000079: regulation of cyclin-dependent protein kinase activity, GO:0000086: G2/M transition of mitotic cell cycle, GO:0005515: protein binding, GO:0005634: nucleus, GO:0006281: DNA repair, GO:0006469: negative regulation of protein kinase activity, GO:0006915: apoptotic process, GO:0007050: cell cycle arrest, GO:0007098: centrosome cycle, GO:0042770: signal transduction in response to DNA dam…	04010: MAPK signaling pathway, 04110: Cell cycle, 04115: p53 signaling pathway	10.4384	10.5315	11.3423	11.358	11.0486	11.0365	11.0544	11.0952
79094	CHAC1	ChaC, cation transport regulator homolog 1 (E. coli)	GO:0005112: Notch binding, GO:0005515: protein binding, GO:0005794: Golgi apparatus, GO:0005802: trans-Golgi network, GO:0005829: cytosol, GO:0006986: response to unfolded protein, GO:0007219: Notch signaling pathway, GO:0010955: negative regulation of protein processing, GO:0022008: neurogenesis, GO:0045746: negative regulation of Notch signaling pathway, GO:0070059: intrinsic apoptotic signalin…		7.01206	7.03505	8.01017	8.18789	7.77365	7.6735	7.7481	7.80734
115123	MARCH3	membrane-associated ring finger (C3HC4) 3, E3 ubiquitin protein ligase	GO:0005764: lysosome, GO:0005768: endosome, GO:0006897: endocytosis, GO:0008270: zinc ion binding, GO:0016021: integral to membrane, GO:0016567: protein ubiquitination, GO:0016874: ligase activity, GO:0030659: cytoplasmic vesicle membrane, GO:0031901: early endosome membrane		9.22972	9.2228	9.62875	9.74693	9.55854	9.56995	9.5943	9.59484
126308	MOB3A	MOB kinase activator 3A	GO:0005622: intracellular, GO:0046872: metal ion binding		9.2292	9.18568	9.4799	9.41689	9.42688	9.4183	9.39701	9.35676
9854	C2CD2L	C2CD2-like	GO:0003674: molecular_function, GO:0005575: cellular_component, GO:0008150: biological_process, GO:0016021: integral to membrane		6.12052	5.98758	6.53402	6.41639	6.42255	6.45261	6.38946	6.30399
53834	FGFRL1	fibroblast growth factor receptor-like 1	GO:0001501: skeletal system development, GO:0001558: regulation of cell growth, GO:0003179: heart valve morphogenesis, GO:0005007: fibroblast growth factor-activated receptor activity, GO:0005886: plasma membrane, GO:0008201: heparin binding, GO:0008285: negative regulation of cell proliferation, GO:0008543: fibroblast growth factor receptor signaling pathway, GO:0016021: integral to membrane, GO…		6.35605	6.11623	6.9593	6.8559	6.84627	6.84606	6.78004	6.76497
132720	C4orf32	chromosome 4 open reading frame 32	GO:0016021: integral to membrane		5.68039	5.51458	6.21656	6.05032	6.10869	6.04934	5.91745	5.91819
64168	NECAB1	N-terminal EF-hand calcium binding protein 1	GO:0005509: calcium ion binding, GO:0005634: nucleus, GO:0005737: cytoplasm, GO:0043231: intracellular membrane-bounded organelle		2.58232	2.41775	2.93461	2.85427	2.92829	2.89566	2.73999	2.78878
142910	LIPJ	lipase, family member J	GO:0016042: lipid catabolic process, GO:0016788: hydrolase activity, acting on ester bonds		1.07434	1.02835	1.34387	1.31686	1.28695	1.28695	1.34678	1.24699
8019	BRD3	bromodomain containing 3	GO:0003674: molecular_function, GO:0003682: chromatin binding, GO:0005515: protein binding, GO:0005634: nucleus, GO:0006357: regulation of transcription from RNA polymerase II promoter, GO:0008150: biological_process, GO:0070577: histone acetyl-lysine binding		5.99834	5.94118	6.23876	6.22613	6.17504	6.2025	6.22269	6.12808
158747	MOSPD2	motile sperm domain containing 2	GO:0005198: structural molecule activity, GO:0016021: integral to membrane		6.10471	6.09048	6.60965	6.50549	6.51812	6.42929	6.46629	6.32458
144811	LACC1	laccase (multicopper oxidoreductase) domain containing 1			6.52353	6.46793	6.94194	6.90005	6.97685	6.92364	6.86349	6.73849
84910	TMEM87B	transmembrane protein 87B	GO:0016021: integral to membrane		7.44671	7.4984	7.80282	7.68601	7.77704	7.87423	7.696	7.71355
196	AHR	aryl hydrocarbon receptor	GO:0000122: negative regulation of transcription from RNA polymerase II promoter, GO:0001541: ovarian follicle development, GO:0001568: blood vessel development, GO:0003677: DNA binding, GO:0003677: DNA binding, GO:0003700: sequence-specific DNA binding transcription factor activity, GO:0003705: RNA polymerase II distal enhancer sequence-specific DNA binding transcription factor activity, GO:0004…		9.2427	9.25078	9.59354	9.49298	9.54152	9.64242	9.42729	9.42277
2617	GARS	glycyl-tRNA synthetase	GO:0004820: glycine-tRNA ligase activity, GO:0004820: glycine-tRNA ligase activity, GO:0005524: ATP binding, GO:0005737: cytoplasm, GO:0005759: mitochondrial matrix, GO:0005829: cytosol, GO:0006418: tRNA aminoacylation for protein translation, GO:0006426: glycyl-tRNA aminoacylation, GO:0008219: cell death, GO:0010467: gene expression, GO:0015966: diadenosine tetraphosphate biosynthetic process, G…	00970: Aminoacyl-tRNA biosynthesis	10.1117	10.1531	10.426	10.3968	10.6147	10.5456	10.4031	10.4764
400643	LINC00668	long intergenic non-protein coding RNA 668			2.79307	2.68792	3.0777	3.08638	3.13913	3.18005	3.02112	3.0756
80014	WWC2	WW and C2 domain containing 2			7.29664	7.28841	7.45646	7.44402	7.48781	7.44581	7.37955	7.42314
388135	C15orf59	chromosome 15 open reading frame 59			3.33111	3.44705	3.665	3.81483	3.79547	3.7579	3.64302	3.50874
54764	ZRANB1	zinc finger, RAN-binding domain containing 1	GO:0004221: ubiquitin thiolesterase activity, GO:0004843: ubiquitin-specific protease activity, GO:0005515: protein binding, GO:0005634: nucleus, GO:0005737: cytoplasm, GO:0007010: cytoskeleton organization, GO:0008270: zinc ion binding, GO:0016055: Wnt receptor signaling pathway, GO:0016477: cell migration, GO:0022604: regulation of cell morphogenesis, GO:0030177: positive regulation of Wnt rece…		9.03191	8.99249	9.27554	9.38663	9.31317	9.31248	9.27083	9.18911
100616216	MIR4797	microRNA 4797			0.74806	0.78057	0.996688	1.1876	1.08283	1.26477	0.861801	0.860798
100302177	MIR1269A	microRNA 1269a			3.65986	3.70073	3.98193	4.03895	3.93748	4.09047	3.86616	3.81261
1054	CEBPG	CCAAT/enhancer binding protein (C/EBP), gamma	GO:0001889: liver development, GO:0003677: DNA binding, GO:0003690: double-stranded DNA binding, GO:0003700: sequence-specific DNA binding transcription factor activity, GO:0005515: protein binding, GO:0005634: nucleus, GO:0005634: nucleus, GO:0006351: transcription, DNA-dependent, GO:0006357: regulation of transcription from RNA polymerase II promoter, GO:0006955: immune response, GO:0008134: tr…		6.88826	6.83585	7.44699	7.30667	7.44279	7.44381	7.07421	6.9479
26054	SENP6	SUMO1/sentrin specific peptidase 6	GO:0005515: protein binding, GO:0005634: nucleus, GO:0005737: cytoplasm, GO:0006508: proteolysis, GO:0016925: protein sumoylation, GO:0016926: protein desumoylation, GO:0016929: SUMO-specific protease activity, GO:0070646: protein modification by small protein removal, GO:0090169: regulation of spindle assembly, GO:0090234: regulation of kinetochore assembly		8.05137	8.11487	8.33393	8.27369	8.4703	8.46707	8.25355	8.14425
55553	SOX6	SRY (sex determining region Y)-box 6	GO:0000122: negative regulation of transcription from RNA polymerase II promoter, GO:0000902: cell morphogenesis, GO:0001701: in utero embryonic development, GO:0003677: DNA binding, GO:0003700: sequence-specific DNA binding transcription factor activity, GO:0005515: protein binding, GO:0005634: nucleus, GO:0005634: nucleus, GO:0006351: transcription, DNA-dependent, GO:0006355: regulation of tran…		1.85606	1.88095	2.21069	2.14631	2.22201	2.41798	2.03528	1.96721
4779	NFE2L1	nuclear factor (erythroid-derived 2)-like 1	GO:0003700: sequence-specific DNA binding transcription factor activity, GO:0003712: transcription cofactor activity, GO:0005634: nucleus, GO:0005789: endoplasmic reticulum membrane, GO:0006355: regulation of transcription, DNA-dependent, GO:0006366: transcription from RNA polymerase II promoter, GO:0006783: heme biosynthetic process, GO:0006954: inflammatory response, GO:0009653: anatomical stru…		9.58009	9.63466	9.76225	9.73513	9.76338	9.84941	9.67222	9.62643
79572	ATP13A3	ATPase type 13A3	GO:0005524: ATP binding, GO:0006812: cation transport, GO:0015662: ATPase activity, coupled to transmembrane movement of ions, phosphorylative mechanism, GO:0016021: integral to membrane, GO:0046872: metal ion binding		9.45968	9.4647	9.77951	9.76499	9.68433	9.75781	9.84639	9.84054
4209	MEF2D	myocyte enhancer factor 2D	GO:0000977: RNA polymerase II regulatory region sequence-specific DNA binding, GO:0000981: sequence-specific DNA binding RNA polymerase II transcription factor activity, GO:0001649: osteoblast differentiation, GO:0001958: endochondral ossification, GO:0002062: chondrocyte differentiation, GO:0003700: sequence-specific DNA binding transcription factor activity, GO:0005515: protein binding, GO:0005…		8.61511	8.48105	9.44773	9.40586	9.20561	9.18127	9.53208	9.63006
3383	ICAM1	intercellular adhesion molecule 1	GO:0001541: ovarian follicle development, GO:0001772: immunological synapse, GO:0001910: regulation of leukocyte mediated cytotoxicity, GO:0001975: response to amphetamine, GO:0002291: T cell activation via T cell receptor contact with antigen bound to MHC molecule on antigen presenting cell, GO:0002457: T cell antigen processing and presentation, GO:0002693: positive regulation of cellular extra…	04514: Cell adhesion molecules (CAMs), 04650: Natural killer cell mediated cytotoxicity, 04670: Leukocyte transendothelial migration, 05143: African trypanosomiasis, 05144: Malaria, 05150: Staphylococcus aureus infection, 05323: Rheumatoid arthritis, 05416: Viral myocarditis	8.39892	8.33981	9.09579	9.08117	8.86837	8.84537	9.15812	9.16995
10957	PNRC1	proline-rich nuclear receptor coactivator 1	GO:0005515: protein binding, GO:0005634: nucleus, GO:0006351: transcription, DNA-dependent, GO:0006355: regulation of transcription, DNA-dependent		7.93859	7.80136	9.2205	9.20873	8.87379	8.7339	9.53286	9.55697
3656	IRAK2	interleukin-1 receptor-associated kinase 2	GO:0000187: activation of MAPK activity, GO:0001959: regulation of cytokine-mediated signaling pathway, GO:0002224: toll-like receptor signaling pathway, GO:0002755: MyD88-dependent toll-like receptor signaling pathway, GO:0002756: MyD88-independent toll-like receptor signaling pathway, GO:0004672: protein kinase activity, GO:0005515: protein binding, GO:0005524: ATP binding, GO:0005829: cytosol,…	04210: Apoptosis, 04722: Neurotrophin signaling pathway	7.25231	7.17044	8.48519	8.41363	8.1261	8.15364	8.93455	8.95521
7328	UBE2H	ubiquitin-conjugating enzyme E2H	GO:0004842: ubiquitin-protein ligase activity, GO:0005515: protein binding, GO:0005524: ATP binding, GO:0006511: ubiquitin-dependent protein catabolic process, GO:0016567: protein ubiquitination, GO:0070936: protein K48-linked ubiquitination, GO:0070979: protein K11-linked ubiquitination	04120: Ubiquitin mediated proteolysis	8.86065	8.91628	9.54422	9.56352	9.43433	9.34155	9.53906	9.61157
83607	AMMECR1L	AMME chromosomal region gene 1-like			7.59396	7.64758	8.09635	8.04003	8.03582	8.01903	8.13145	8.13924
57567	ZNF319	zinc finger protein 319	GO:0003677: DNA binding, GO:0005634: nucleus, GO:0006351: transcription, DNA-dependent, GO:0006355: regulation of transcription, DNA-dependent, GO:0008270: zinc ion binding		5.595	5.52035	6.1164	6.01129	5.97875	5.95729	6.03478	6.09125
3726	JUNB	jun B proto-oncogene	GO:0000785: chromatin, GO:0001570: vasculogenesis, GO:0001649: osteoblast differentiation, GO:0001829: trophectodermal cell differentiation, GO:0003677: DNA binding, GO:0003690: double-stranded DNA binding, GO:0003700: sequence-specific DNA binding transcription factor activity, GO:0003713: transcription coactivator activity, GO:0003714: transcription corepressor activity, GO:0005515: protein bin…	04380: Osteoclast differentiation	6.42342	6.53326	8.1278	7.88563	7.39393	7.37215	7.93206	7.94455
9945	GFPT2	glutamine-fructose-6-phosphate transaminase 2	GO:0004360: glutamine-fructose-6-phosphate transaminase (isomerizing) activity, GO:0005829: cytosol, GO:0006002: fructose 6-phosphate metabolic process, GO:0006048: UDP-N-acetylglucosamine biosynthetic process, GO:0006048: UDP-N-acetylglucosamine biosynthetic process, GO:0006112: energy reserve metabolic process, GO:0006488: dolichol-linked oligosaccharide biosynthetic process, GO:0006541: glutam…	00250: Alanine, aspartate and glutamate metabolism, 00520: Amino sugar and nucleotide sugar metabolism, 01100: Metabolic pathways	7.47642	7.43441	8.96652	8.8362	8.2679	8.27532	8.78426	8.87149
221079	ARL5B	ADP-ribosylation factor-like 5B	GO:0005525: GTP binding, GO:0005622: intracellular, GO:0007264: small GTPase mediated signal transduction		7.41899	7.51678	8.54433	8.59339	7.98723	8.04108	8.64623	8.61385
6482	ST3GAL1	ST3 beta-galactoside alpha-2,3-sialyltransferase 1	GO:0000139: Golgi membrane, GO:0003836: beta-galactoside (CMP) alpha-2,3-sialyltransferase activity, GO:0005576: extracellular region, GO:0006464: cellular protein modification process, GO:0006468: protein phosphorylation, GO:0016266: O-glycan processing, GO:0030173: integral to Golgi membrane, GO:0032580: Golgi cisterna membrane, GO:0043687: post-translational protein modification, GO:0044267: c…	00512: Mucin type O-Glycan biosynthesis, 00533: Glycosaminoglycan biosynthesis - keratan sulfate, 00603: Glycosphingolipid biosynthesis - globo series, 00604: Glycosphingolipid biosynthesis - ganglio series, 01100: Metabolic pathways	6.1129	6.19447	7.17785	7.19961	6.69982	6.59658	7.17435	7.1853
56970	ATXN7L3	ataxin 7-like 3	GO:0000124: SAGA complex, GO:0003713: transcription coactivator activity, GO:0005515: protein binding, GO:0006351: transcription, DNA-dependent, GO:0016578: histone deubiquitination, GO:0030374: ligand-dependent nuclear receptor transcription coactivator activity, GO:0045893: positive regulation of transcription, DNA-dependent, GO:0046872: metal ion binding		6.78691	6.81969	7.55297	7.52418	7.15	7.11937	7.54756	7.56473
9180	OSMR	oncostatin M receptor	GO:0002675: positive regulation of acute inflammatory response, GO:0004924: oncostatin-M receptor activity, GO:0005900: oncostatin-M receptor complex, GO:0007166: cell surface receptor signaling pathway, GO:0008283: cell proliferation, GO:0008284: positive regulation of cell proliferation, GO:0019838: growth factor binding, GO:0034097: response to cytokine stimulus, GO:0038165: oncostatin-M-media…	04060: Cytokine-cytokine receptor interaction, 04630: Jak-STAT signaling pathway	9.1451	9.12208	9.58998	9.58691	9.36363	9.38371	9.69301	9.63911
2879	GPX4	glutathione peroxidase 4	GO:0004602: glutathione peroxidase activity, GO:0005739: mitochondrion, GO:0006644: phospholipid metabolic process, GO:0006979: response to oxidative stress, GO:0007275: multicellular organismal development, GO:0047066: phospholipid-hydroperoxide glutathione peroxidase activity, GO:0055114: oxidation-reduction process	00480: Glutathione metabolism	8.92716	8.95052	9.23408	9.25223	9.31006	9.30946	9.41463	9.41077
6648	SOD2	superoxide dismutase 2, mitochondrial	GO:0000303: response to superoxide, GO:0001315: age-dependent response to reactive oxygen species, GO:0001666: response to hypoxia, GO:0001836: release of cytochrome c from mitochondria, GO:0001889: liver development, GO:0003032: detection of oxygen, GO:0003069: vasodilation by acetylcholine involved in regulation of systemic arterial blood pressure, GO:0003677: DNA binding, GO:0004784: superoxid…	04146: Peroxisome, 05016: Huntington's disease	10.0722	10.1219	10.8218	10.77	11.0498	11.0625	11.2732	11.3177
23012	STK38L	serine/threonine kinase 38 like	GO:0000287: magnesium ion binding, GO:0003779: actin binding, GO:0004674: protein serine/threonine kinase activity, GO:0005515: protein binding, GO:0005524: ATP binding, GO:0005634: nucleus, GO:0005737: cytoplasm, GO:0005886: plasma membrane, GO:0006468: protein phosphorylation, GO:0007243: intracellular protein kinase cascade, GO:0015629: actin cytoskeleton, GO:0043231: intracellular membrane-bo…		6.82221	6.8508	7.22759	7.17689	7.28064	7.29987	7.45349	7.44401
84966	IGSF21	immunoglobin superfamily, member 21	GO:0005576: extracellular region		3.99072	4.01568	4.20692	4.19533	4.2575	4.29454	4.36305	4.35334
9181	ARHGEF2	Rho/Rac guanine nucleotide exchange factor (GEF) 2	GO:0000132: establishment of mitotic spindle orientation, GO:0000902: cell morphogenesis, GO:0005089: Rho guanyl-nucleotide exchange factor activity, GO:0005515: protein binding, GO:0005543: phospholipid binding, GO:0005622: intracellular, GO:0005794: Golgi apparatus, GO:0005819: spindle, GO:0005829: cytosol, GO:0005874: microtubule, GO:0005923: tight junction, GO:0006886: intracellular protein t…	05130: Pathogenic Escherichia coli infection	7.56778	7.66905	8.2558	8.23119	8.27648	8.2618	8.54697	8.62327
10090	UST	uronyl-2-sulfotransferase	GO:0000139: Golgi membrane, GO:0006477: protein sulfation, GO:0008146: sulfotransferase activity, GO:0016021: integral to membrane	00532: Glycosaminoglycan biosynthesis - chondroitin sulfate	5.80409	5.64632	6.36789	6.46394	6.52317	6.49791	6.6978	6.66905
4791	NFKB2	nuclear factor of kappa light polypeptide gene enhancer in B-cells 2 (p49/p100)	GO:0002224: toll-like receptor signaling pathway, GO:0002268: follicular dendritic cell differentiation, GO:0002467: germinal center formation, GO:0002755: MyD88-dependent toll-like receptor signaling pathway, GO:0002756: MyD88-independent toll-like receptor signaling pathway, GO:0003677: DNA binding, GO:0003700: sequence-specific DNA binding transcription factor activity, GO:0003713: transcripti…	04010: MAPK signaling pathway, 04380: Osteoclast differentiation, 05200: Pathways in cancer	6.78337	6.59112	7.54444	7.47538	7.60533	7.57447	7.77527	7.85508
4609	MYC	v-myc myelocytomatosis viral oncogene homolog (avian)	GO:0000122: negative regulation of transcription from RNA polymerase II promoter, GO:0000165: MAPK cascade, GO:0001658: branching involved in ureteric bud morphogenesis, GO:0002053: positive regulation of mesenchymal cell proliferation, GO:0003677: DNA binding, GO:0003677: DNA binding, GO:0003700: sequence-specific DNA binding transcription factor activity, GO:0005515: protein binding, GO:0005634…	04010: MAPK signaling pathway, 04012: ErbB signaling pathway, 04110: Cell cycle, 04310: Wnt signaling pathway, 04350: TGF-beta signaling pathway, 04630: Jak-STAT signaling pathway, 05200: Pathways in cancer, 05210: Colorectal cancer, 05213: Endometrial cancer, 05216: Thyroid cancer, 05219: Bladder cancer, 05220: Chronic myeloid leukemia, 05221: Acute myeloid leukemia, 05222: Small cell lung cancer	8.02241	7.89406	8.91908	8.8918	8.93013	9.00194	9.09035	9.06001
57761	TRIB3	tribbles homolog 3 (Drosophila)	GO:0003714: transcription corepressor activity, GO:0004860: protein kinase inhibitor activity, GO:0005515: protein binding, GO:0005524: ATP binding, GO:0005634: nucleus, GO:0005634: nucleus, GO:0005829: cytosol, GO:0005886: plasma membrane, GO:0006351: transcription, DNA-dependent, GO:0006355: regulation of transcription, DNA-dependent, GO:0006468: protein phosphorylation, GO:0006469: negative re…		8.01628	7.87214	9.21849	9.33365	9.25549	9.01634	9.35771	9.27608
3576	IL8	interleukin 8	GO:0001525: angiogenesis, GO:0002237: response to molecule of bacterial origin, GO:0005153: interleukin-8 receptor binding, GO:0005515: protein binding, GO:0005576: extracellular region, GO:0005615: extracellular space, GO:0005622: intracellular, GO:0006928: cellular component movement, GO:0006954: inflammatory response, GO:0006955: immune response, GO:0006987: activation of signaling protein act…	04060: Cytokine-cytokine receptor interaction, 04062: Chemokine signaling pathway, 04620: Toll-like receptor signaling pathway, 04621: NOD-like receptor signaling pathway, 04622: RIG-I-like receptor signaling pathway, 05120: Epithelial cell signaling in Helicobacter pylori infection, 05131: Shigellosis, 05142: Chagas disease (American trypanosomiasis), 05144: Malaria, 05146: Amoebiasis, 05160: He…	6.96863	6.95596	8.14968	8.1695	8.1129	7.96137	8.25534	8.12177
26188	OR1C1	olfactory receptor, family 1, subfamily C, member 1	GO:0004930: G-protein coupled receptor activity, GO:0004984: olfactory receptor activity, GO:0005886: plasma membrane, GO:0007608: sensory perception of smell, GO:0016021: integral to membrane, GO:0050911: detection of chemical stimulus involved in sensory perception of smell	04740: Olfactory transduction	2.84435	2.79408	3.13803	3.23573	3.17079	3.18376	3.21815	3.2195
4552	MTRR	5-methyltetrahydrofolate-homocysteine methyltransferase reductase	GO:0005506: iron ion binding, GO:0005634: nucleus, GO:0005737: cytoplasm, GO:0005829: cytosol, GO:0006555: methionine metabolic process, GO:0009086: methionine biosynthetic process, GO:0010181: FMN binding, GO:0016723: oxidoreductase activity, oxidizing metal ions, NAD or NADP as acceptor, GO:0030586: [methionine synthase] reductase activity, GO:0045111: intermediate filament cytoskeleton, GO:005…		9.06946	9.02906	9.32062	9.36261	9.3747	9.36263	9.36432	9.37294
440	ASNS	asparagine synthetase (glutamine-hydrolyzing)	GO:0001889: liver development, GO:0004066: asparagine synthase (glutamine-hydrolyzing) activity, GO:0004066: asparagine synthase (glutamine-hydrolyzing) activity, GO:0005524: ATP binding, GO:0005829: cytosol, GO:0006529: asparagine biosynthetic process, GO:0006529: asparagine biosynthetic process, GO:0006541: glutamine metabolic process, GO:0006987: activation of signaling protein activity involv…	00250: Alanine, aspartate and glutamate metabolism, 00910: Nitrogen metabolism, 01100: Metabolic pathways	6.72941	6.69938	7.56344	7.53661	7.74454	7.58128	7.69017	7.73301
9988	DMTF1	cyclin D binding myb-like transcription factor 1	GO:0003677: DNA binding, GO:0003700: sequence-specific DNA binding transcription factor activity, GO:0005634: nucleus, GO:0005634: nucleus, GO:0005737: cytoplasm, GO:0006351: transcription, DNA-dependent, GO:0006355: regulation of transcription, DNA-dependent, GO:0007049: cell cycle		7.30323	7.31762	7.55	7.50217	7.6248	7.55245	7.58108	7.5735
80003	PCNXL2	pecanex-like 2 (Drosophila)	GO:0016021: integral to membrane		5.8932	5.85674	6.34328	6.28194	6.46704	6.36644	6.5059	6.56485
8780	RIOK3	RIO kinase 3 (yeast)	GO:0004674: protein serine/threonine kinase activity, GO:0005515: protein binding, GO:0005524: ATP binding, GO:0007059: chromosome segregation		8.50367	8.4873	8.85512	8.82665	8.94932	8.91972	8.9611	9.01781
133746	JMY	junction mediating and regulatory protein, p53 cofactor	GO:0003713: transcription coactivator activity, GO:0003779: actin binding, GO:0005515: protein binding, GO:0005634: nucleus, GO:0005737: cytoplasm, GO:0005856: cytoskeleton, GO:0006281: DNA repair, GO:0006357: regulation of transcription from RNA polymerase II promoter, GO:0006917: induction of apoptosis, GO:0007050: cell cycle arrest, GO:0031252: cell leading edge, GO:0034314: Arp2/3 complex-med…		5.7389	5.60457	6.0999	6.268	6.65909	6.57994	6.53541	6.53905
1486	CTBS	chitobiase, di-N-acetyl-	GO:0004568: chitinase activity, GO:0005764: lysosome, GO:0006032: chitin catabolic process, GO:0009313: oligosaccharide catabolic process, GO:0043169: cation binding		7.48135	7.44367	7.76985	7.71667	7.88679	7.87424	7.89048	7.82983
54462	FAM190B	family with sequence similarity 190, member B			8.99979	8.95537	9.15878	9.11753	9.2795	9.27817	9.25185	9.23656
191	AHCY	adenosylhomocysteinase	GO:0000096: sulfur amino acid metabolic process, GO:0004013: adenosylhomocysteinase activity, GO:0005737: cytoplasm, GO:0005829: cytosol, GO:0006730: one-carbon metabolic process, GO:0006805: xenobiotic metabolic process, GO:0032259: methylation, GO:0034641: cellular nitrogen compound metabolic process, GO:0042470: melanosome, GO:0044281: small molecule metabolic process	00270: Cysteine and methionine metabolism, 01100: Metabolic pathways	8.00299	7.94409	8.19782	8.20614	8.11271	8.10165	8.14306	8.13986
55454	CSGALNACT2	chondroitin sulfate N-acetylgalactosaminyltransferase 2	GO:0008376: acetylgalactosaminyltransferase activity, GO:0030166: proteoglycan biosynthetic process, GO:0030173: integral to Golgi membrane, GO:0032580: Golgi cisterna membrane, GO:0046872: metal ion binding, GO:0047237: glucuronylgalactosylproteoglycan 4-beta-N-acetylgalactosaminyltransferase activity, GO:0050650: chondroitin sulfate proteoglycan biosynthetic process, GO:0050651: dermatan sulfat…	00532: Glycosaminoglycan biosynthesis - chondroitin sulfate, 01100: Metabolic pathways	7.54857	7.53995	8.47506	8.5025	7.99423	8.10439	8.29775	8.21104
286343	LURAP1L	leucine rich adaptor protein 1-like			7.6331	7.48825	8.83117	8.98915	8.1716	8.20915	8.69187	8.6627
2081	ERN1	endoplasmic reticulum to nucleus signaling 1	GO:0000287: magnesium ion binding, GO:0004521: endoribonuclease activity, GO:0004521: endoribonuclease activity, GO:0004674: protein serine/threonine kinase activity, GO:0004674: protein serine/threonine kinase activity, GO:0005515: protein binding, GO:0005524: ATP binding, GO:0005637: nuclear inner membrane, GO:0005789: endoplasmic reticulum membrane, GO:0006351: transcription, DNA-dependent, GO…	04141: Protein processing in endoplasmic reticulum, 05010: Alzheimer's disease	5.97076	5.756	6.99684	6.84773	6.34489	6.28977	6.71516	6.59433
51230	PHF20	PHD finger protein 20	GO:0000123: histone acetyltransferase complex, GO:0003677: DNA binding, GO:0006351: transcription, DNA-dependent, GO:0006355: regulation of transcription, DNA-dependent, GO:0008270: zinc ion binding, GO:0043981: histone H4-K5 acetylation, GO:0043982: histone H4-K8 acetylation, GO:0043984: histone H4-K16 acetylation, GO:0043995: histone acetyltransferase activity (H4-K5 specific), GO:0043996: hist…		6.97281	6.91645	7.47169	7.4592	7.23774	7.12211	7.32607	7.27389
1997	ELF1	E74-like factor 1 (ets domain transcription factor)	GO:0001817: regulation of cytokine production, GO:0003700: sequence-specific DNA binding transcription factor activity, GO:0005515: protein binding, GO:0005634: nucleus, GO:0005634: nucleus, GO:0005737: cytoplasm, GO:0006351: transcription, DNA-dependent, GO:0043565: sequence-specific DNA binding, GO:0045893: positive regulation of transcription, DNA-dependent, GO:0045893: positive regulation of …		9.35105	9.358	9.56434	9.52492	9.48003	9.45036	9.47456	9.50399
79365	BHLHE41	basic helix-loop-helix family, member e41	GO:0000122: negative regulation of transcription from RNA polymerase II promoter, GO:0000122: negative regulation of transcription from RNA polymerase II promoter, GO:0000978: RNA polymerase II core promoter proximal region sequence-specific DNA binding, GO:0001078: RNA polymerase II core promoter proximal region sequence-specific DNA binding transcription factor activity involved in negative reg…	04710: Circadian rhythm - mammal	6.44904	6.39689	7.43442	7.29077	6.97659	6.90703	7.00358	7.09766
118429	ANTXR2	anthrax toxin receptor 2	GO:0004872: receptor activity, GO:0005515: protein binding, GO:0005576: extracellular region, GO:0005789: endoplasmic reticulum membrane, GO:0005886: plasma membrane, GO:0016021: integral to membrane, GO:0022414: reproductive process, GO:0046872: metal ion binding		8.66383	8.80236	9.29898	9.22575	8.82416	8.87124	8.94043	8.98813
1490	CTGF	connective tissue growth factor	GO:0001502: cartilage condensation, GO:0001503: ossification, GO:0001525: angiogenesis, GO:0001558: regulation of cell growth, GO:0001934: positive regulation of protein phosphorylation, GO:0001968: fibronectin binding, GO:0005178: integrin binding, GO:0005520: insulin-like growth factor binding, GO:0005576: extracellular region, GO:0005578: proteinaceous extracellular matrix, GO:0005615: extrace…		6.81839	6.65274	8.07293	7.96581	7.25333	7.11411	7.44608	7.31433
55435	AP1AR	adaptor-related protein complex 1 associated regulatory protein	GO:0005730: nucleolus, GO:0005737: cytoplasm, GO:0005769: early endosome, GO:0005770: late endosome, GO:0005794: Golgi apparatus, GO:0015031: protein transport, GO:0030133: transport vesicle		6.24262	6.29127	6.6132	6.62623	6.37477	6.45517	6.40326	6.48382
23609	MKRN2	makorin ring finger protein 2	GO:0003674: molecular_function, GO:0003676: nucleic acid binding, GO:0005622: intracellular, GO:0008150: biological_process, GO:0008270: zinc ion binding, GO:0016567: protein ubiquitination, GO:0016874: ligase activity		7.93649	8.00832	8.34001	8.37915	8.15486	8.19519	8.2086	8.24419
9518	GDF15	growth differentiation factor 15	GO:0005125: cytokine activity, GO:0005576: extracellular region, GO:0005615: extracellular space, GO:0007165: signal transduction, GO:0007179: transforming growth factor beta receptor signaling pathway, GO:0007267: cell-cell signaling, GO:0008083: growth factor activity		6.47767	6.56555	9.4868	9.50515	7.25663	7.21281	9.51704	9.48734
467	ATF3	activating transcription factor 3	GO:0003700: sequence-specific DNA binding transcription factor activity, GO:0003714: transcription corepressor activity, GO:0005515: protein binding, GO:0005634: nucleus, GO:0005654: nucleoplasm, GO:0005730: nucleolus, GO:0006094: gluconeogenesis, GO:0006351: transcription, DNA-dependent, GO:0006355: regulation of transcription, DNA-dependent, GO:0006987: activation of signaling protein activity …		4.86909	5.08475	7.10629	7.16549	5.646	5.66376	7.11308	6.94194
1191	CLU	clusterin	GO:0001836: release of cytochrome c from mitochondria, GO:0002576: platelet degranulation, GO:0005515: protein binding, GO:0005576: extracellular region, GO:0005615: extracellular space, GO:0005634: nucleus, GO:0005739: mitochondrion, GO:0005783: endoplasmic reticulum, GO:0005829: cytosol, GO:0006629: lipid metabolic process, GO:0006916: anti-apoptosis, GO:0006956: complement activation, GO:00069…		7.71664	7.63981	8.7598	8.68578	7.9577	7.9272	8.65508	8.56641
54206	ERRFI1	ERBB receptor feedback inhibitor 1	GO:0005100: Rho GTPase activator activity, GO:0005515: protein binding, GO:0005634: nucleus, GO:0005737: cytoplasm, GO:0005737: cytoplasm, GO:0006950: response to stress, GO:0007175: negative regulation of epidermal growth factor-activated receptor activity, GO:0007175: negative regulation of epidermal growth factor-activated receptor activity, GO:0019901: protein kinase binding, GO:0031234: extr…		7.40084	7.39299	9.30225	9.35418	7.77997	7.72566	9.0391	9.01272
4084	MXD1	MAX dimerization protein 1	GO:0003677: DNA binding, GO:0003700: sequence-specific DNA binding transcription factor activity, GO:0003712: transcription cofactor activity, GO:0003714: transcription corepressor activity, GO:0005634: nucleus, GO:0005737: cytoplasm, GO:0005739: mitochondrion, GO:0006351: transcription, DNA-dependent, GO:0006355: regulation of transcription, DNA-dependent, GO:0007275: multicellular organismal de…		5.53555	5.69677	8.5575	8.51964	6.0154	5.95976	8.31183	8.3209
64782	AEN	apoptosis enhancing nuclease	GO:0003676: nucleic acid binding, GO:0004527: exonuclease activity, GO:0005654: nucleoplasm, GO:0005730: nucleolus, GO:0006915: apoptotic process, GO:0010212: response to ionizing radiation, GO:0042771: DNA damage response, signal transduction by p53 class mediator resulting in induction of apoptosis		6.9871	6.98842	8.45258	8.40572	7.18995	7.18284	8.26804	8.29329
1317	SLC31A1	solute carrier family 31 (copper transporters), member 1	GO:0005375: copper ion transmembrane transporter activity, GO:0005886: plasma membrane, GO:0005887: integral to plasma membrane, GO:0006825: copper ion transport, GO:0035434: copper ion transmembrane transport, GO:0055085: transmembrane transport		9.17193	9.3011	9.99963	9.99798	9.47789	9.4143	9.7208	9.79151
7494	XBP1	X-box binding protein 1	GO:0003677: DNA binding, GO:0003700: sequence-specific DNA binding transcription factor activity, GO:0005634: nucleus, GO:0005654: nucleoplasm, GO:0006355: regulation of transcription, DNA-dependent, GO:0006366: transcription from RNA polymerase II promoter, GO:0006955: immune response, GO:0006987: activation of signaling protein activity involved in unfolded protein response, GO:0030968: endopla…	04141: Protein processing in endoplasmic reticulum	7.79562	7.97382	9.1287	9.12259	8.37236	8.23617	8.7427	8.75807
8795	TNFRSF10B	tumor necrosis factor receptor superfamily, member 10b	GO:0004872: receptor activity, GO:0005515: protein binding, GO:0005886: plasma membrane, GO:0006915: apoptotic process, GO:0006915: apoptotic process, GO:0006919: activation of cysteine-type endopeptidase activity involved in apoptotic process, GO:0007166: cell surface receptor signaling pathway, GO:0007250: activation of NF-kappaB-inducing kinase activity, GO:0008624: induction of apoptosis by e…	04060: Cytokine-cytokine receptor interaction, 04115: p53 signaling pathway, 04210: Apoptosis, 04650: Natural killer cell mediated cytotoxicity	6.86253	6.94744	7.85563	7.81951	7.24815	7.18923	7.53857	7.57124
7286	TUFT1	tuftelin 1	GO:0005576: extracellular region, GO:0005737: cytoplasm, GO:0030282: bone mineralization, GO:0030345: structural constituent of tooth enamel, GO:0042476: odontogenesis		6.04332	6.24657	7.51434	7.32755	6.6946	6.51579	7.03452	7.07653
330	BIRC3	baculoviral IAP repeat containing 3	GO:0004842: ubiquitin-protein ligase activity, GO:0005515: protein binding, GO:0005634: nucleus, GO:0005737: cytoplasm, GO:0006915: apoptotic process, GO:0006916: anti-apoptosis, GO:0007166: cell surface receptor signaling pathway, GO:0008270: zinc ion binding, GO:0034121: regulation of toll-like receptor signaling pathway, GO:0038061: NIK/NF-kappaB cascade, GO:0039535: regulation of RIG-I signal…	04120: Ubiquitin mediated proteolysis, 04210: Apoptosis, 04510: Focal adhesion, 04621: NOD-like receptor signaling pathway, 05145: Toxoplasmosis, 05200: Pathways in cancer, 05222: Small cell lung cancer	7.25888	7.22733	8.73167	8.77242	7.78762	7.72886	8.31956	8.24258
114990	VASN	vasorin	GO:0005576: extracellular region, GO:0016021: integral to membrane		4.58549	4.66105	5.72663	5.7702	4.96077	4.9429	5.32036	5.25855
64332	NFKBIZ	nuclear factor of kappa light polypeptide gene enhancer in B-cells inhibitor, zeta	GO:0005634: nucleus, GO:0006351: transcription, DNA-dependent, GO:0006355: regulation of transcription, DNA-dependent, GO:0006954: inflammatory response		6.59836	6.61641	7.96494	7.79495	7.15905	7.06183	7.7494	7.6389
1026	CDKN1A	cyclin-dependent kinase inhibitor 1A (p21, Cip1)	GO:0000075: cell cycle checkpoint, GO:0000079: regulation of cyclin-dependent protein kinase activity, GO:0000080: G1 phase of mitotic cell cycle, GO:0000082: G1/S transition of mitotic cell cycle, GO:0000082: G1/S transition of mitotic cell cycle, GO:0000084: S phase of mitotic cell cycle, GO:0000086: G2/M transition of mitotic cell cycle, GO:0000278: mitotic cell cycle, GO:0000307: cyclin-depen…	04012: ErbB signaling pathway, 04110: Cell cycle, 04115: p53 signaling pathway, 05160: Hepatitis C, 05200: Pathways in cancer, 05214: Glioma, 05215: Prostate cancer, 05218: Melanoma, 05219: Bladder cancer, 05220: Chronic myeloid leukemia	6.81785	6.89593	8.27492	8.26687	7.27326	7.29413	7.92702	7.9768
127544	RNF19B	ring finger protein 19B	GO:0005515: protein binding, GO:0008270: zinc ion binding, GO:0016021: integral to membrane, GO:0016567: protein ubiquitination, GO:0016874: ligase activity		6.86102	6.85556	7.52127	7.47183	7.08786	7.04694	7.38189	7.40611
1848	DUSP6	dual specificity phosphatase 6	GO:0000188: inactivation of MAPK activity, GO:0002224: toll-like receptor signaling pathway, GO:0002755: MyD88-dependent toll-like receptor signaling pathway, GO:0002756: MyD88-independent toll-like receptor signaling pathway, GO:0004725: protein tyrosine phosphatase activity, GO:0005654: nucleoplasm, GO:0005737: cytoplasm, GO:0005829: cytosol, GO:0008063: Toll signaling pathway, GO:0009953: dors…	04010: MAPK signaling pathway	7.6147	7.65753	8.94274	8.94703	8.22204	8.00349	8.65748	8.62553
25912	C1orf43	chromosome 1 open reading frame 43	GO:0016021: integral to membrane, GO:0016616: oxidoreductase activity, acting on the CH-OH group of donors, NAD or NADP as acceptor, GO:0050662: coenzyme binding		9.63166	9.68024	10.0008	10.0139	9.81535	9.76887	9.92784	9.95273
55521	TRIM36	tripartite motif containing 36	GO:0001669: acrosomal vesicle, GO:0005856: cytoskeleton, GO:0007340: acrosome reaction, GO:0008270: zinc ion binding, GO:0016874: ligase activity		4.68825	4.55112	5.36499	5.46691	4.74686	4.81324	5.08086	5.13327
163049	ZNF791	zinc finger protein 791	GO:0003677: DNA binding, GO:0005634: nucleus, GO:0006351: transcription, DNA-dependent, GO:0006355: regulation of transcription, DNA-dependent, GO:0008270: zinc ion binding		6.94152	6.77969	7.81674	7.84144	7.02707	6.96441	7.36337	7.4554
10151	HNRNPA3P1	heterogeneous nuclear ribonucleoprotein A3 pseudogene 1			1.69803	1.63642	2.57713	2.49633	1.89097	1.90906	2.20692	2.34341
1849	DUSP7	dual specificity phosphatase 7	GO:0000188: inactivation of MAPK activity, GO:0002224: toll-like receptor signaling pathway, GO:0002755: MyD88-dependent toll-like receptor signaling pathway, GO:0002756: MyD88-independent toll-like receptor signaling pathway, GO:0004725: protein tyrosine phosphatase activity, GO:0005515: protein binding, GO:0005654: nucleoplasm, GO:0005829: cytosol, GO:0008063: Toll signaling pathway, GO:0017017…	04010: MAPK signaling pathway	7.97985	8.06688	9.0339	9.13155	8.291	8.32565	8.88555	8.86718
4616	GADD45B	growth arrest and DNA-damage-inducible, beta	GO:0000185: activation of MAPKKK activity, GO:0000186: activation of MAPKK activity, GO:0005634: nucleus, GO:0006469: negative regulation of protein kinase activity, GO:0006915: apoptotic process, GO:0006950: response to stress, GO:0007275: multicellular organismal development, GO:0030154: cell differentiation, GO:0051726: regulation of cell cycle	04010: MAPK signaling pathway, 04110: Cell cycle, 04115: p53 signaling pathway	7.98587	8.13155	9.40432	9.49965	8.38812	8.32024	9.17657	9.17362
10560	SLC19A2	solute carrier family 19 (thiamine transporter), member 2	GO:0005542: folic acid binding, GO:0005886: plasma membrane, GO:0006766: vitamin metabolic process, GO:0006767: water-soluble vitamin metabolic process, GO:0008517: folic acid transporter activity, GO:0008518: reduced folate carrier activity, GO:0015234: thiamine transmembrane transporter activity, GO:0015403: thiamine uptake transmembrane transporter activity, GO:0015884: folic acid transport, G…	04977: Vitamin digestion and absorption	6.22635	6.30406	7.71185	7.67719	6.53091	6.58226	7.20262	7.19828
4794	NFKBIE	nuclear factor of kappa light polypeptide gene enhancer in B-cells inhibitor, epsilon	GO:0005737: cytoplasm, GO:0005794: Golgi apparatus, GO:0005829: cytosol, GO:0042942: D-serine transport, GO:0042994: cytoplasmic sequestering of transcription factor, GO:0048471: perinuclear region of cytoplasm	04660: T cell receptor signaling pathway, 04662: B cell receptor signaling pathway, 04722: Neurotrophin signaling pathway, 04920: Adipocytokine signaling pathway	6.13371	6.19416	7.49354	7.44824	6.45587	6.45488	7.18801	7.12405
7770	ZNF227	zinc finger protein 227	GO:0003677: DNA binding, GO:0005634: nucleus, GO:0006351: transcription, DNA-dependent, GO:0006355: regulation of transcription, DNA-dependent, GO:0008270: zinc ion binding		5.5798	5.55296	6.54011	6.48079	5.77766	5.80659	6.31368	6.27276
9709	HERPUD1	homocysteine-inducible, endoplasmic reticulum stress-inducible, ubiquitin-like domain member 1	GO:0003674: molecular_function, GO:0005789: endoplasmic reticulum membrane, GO:0005789: endoplasmic reticulum membrane, GO:0006986: response to unfolded protein, GO:0006987: activation of signaling protein activity involved in unfolded protein response, GO:0016021: integral to membrane, GO:0030968: endoplasmic reticulum unfolded protein response	04141: Protein processing in endoplasmic reticulum	7.71012	7.7745	10.585	10.5868	7.85259	7.90061	9.83095	9.94309
5366	PMAIP1	phorbol-12-myristate-13-acetate-induced protein 1	GO:0001836: release of cytochrome c from mitochondria, GO:0001844: protein insertion into mitochondrial membrane involved in apoptotic signaling pathway, GO:0005515: protein binding, GO:0005634: nucleus, GO:0005739: mitochondrion, GO:0005741: mitochondrial outer membrane, GO:0005829: cytosol, GO:0005829: cytosol, GO:0006915: apoptotic process, GO:0006915: apoptotic process, GO:0006917: induction …	04115: p53 signaling pathway	6.35166	6.29744	8.53258	8.4825	6.59329	6.50878	7.98523	8.08475
1839	HBEGF	heparin-binding EGF-like growth factor	GO:0005154: epidermal growth factor receptor binding, GO:0005576: extracellular region, GO:0005615: extracellular space, GO:0005615: extracellular space, GO:0005615: extracellular space, GO:0005887: integral to plasma membrane, GO:0005887: integral to plasma membrane, GO:0007165: signal transduction, GO:0007173: epidermal growth factor receptor signaling pathway, GO:0007517: muscle organ developm…	04012: ErbB signaling pathway, 04912: GnRH signaling pathway, 05120: Epithelial cell signaling in Helicobacter pylori infection	5.84868	5.76367	8.67879	8.7404	6.09941	6.01996	7.68675	7.69392
90637	ZFAND2A	zinc finger, AN1-type domain 2A	GO:0005634: nucleus, GO:0005737: cytoplasm, GO:0008270: zinc ion binding		7.4613	7.53669	10.2245	10.2776	7.86558	7.88849	9.3149	9.38306
6046	BRD2	bromodomain containing 2	GO:0003682: chromatin binding, GO:0005634: nucleus, GO:0006334: nucleosome assembly, GO:0006357: regulation of transcription from RNA polymerase II promoter, GO:0007283: spermatogenesis, GO:0070577: histone acetyl-lysine binding		8.66948	8.64277	9.80657	9.81313	8.81968	8.85185	9.4135	9.4401
9043	SPAG9	sperm associated antigen 9	GO:0001669: acrosomal vesicle, GO:0005737: cytoplasm, GO:0005829: cytosol, GO:0007257: activation of JUN kinase activity, GO:0007283: spermatogenesis, GO:0008432: JUN kinase binding, GO:0016021: integral to membrane, GO:0019894: kinesin binding, GO:0030335: positive regulation of cell migration, GO:0042147: retrograde transport, endosome to Golgi, GO:0042692: muscle cell differentiation, GO:00435…		8.75344	8.81683	9.34854	9.29138	8.63443	8.70229	8.93283	8.87083
56262	LRRC8A	leucine rich repeat containing 8 family, member A	GO:0002329: pre-B cell differentiation, GO:0016021: integral to membrane		5.63204	5.73767	6.56805	6.44279	5.62971	5.62321	5.99707	5.99808
84301	DDI2	DNA-damage inducible 1 homolog 2 (S. cerevisiae)	GO:0004190: aspartic-type endopeptidase activity, GO:0006508: proteolysis		6.94474	7.05481	7.67878	7.62575	6.93123	6.96295	7.25763	7.2194
140809	SRXN1	sulfiredoxin 1	GO:0003677: DNA binding, GO:0005524: ATP binding, GO:0005829: cytosol, GO:0006979: response to oxidative stress, GO:0016667: oxidoreductase activity, acting on a sulfur group of donors, GO:0032542: sulfiredoxin activity		7.95094	7.89644	9.26142	9.09548	7.52804	7.51262	8.31853	8.32842
4758	NEU1	sialidase 1 (lysosomal sialidase)	GO:0004308: exo-alpha-sialidase activity, GO:0005764: lysosome, GO:0005765: lysosomal membrane, GO:0005886: plasma membrane, GO:0006665: sphingolipid metabolic process, GO:0006687: glycosphingolipid metabolic process, GO:0016023: cytoplasmic membrane-bounded vesicle, GO:0030054: cell junction, GO:0043202: lysosomal lumen, GO:0043231: intracellular membrane-bounded organelle, GO:0044281: small mol…	00511: Other glycan degradation, 00600: Sphingolipid metabolism, 04142: Lysosome	8.76737	8.80112	9.64759	9.65709	8.59463	8.54784	9.11987	9.10835
56999	ADAMTS9	ADAM metallopeptidase with thrombospondin type 1 motif, 9	GO:0004222: metalloendopeptidase activity, GO:0005578: proteinaceous extracellular matrix, GO:0005615: extracellular space, GO:0006508: proteolysis, GO:0006516: glycoprotein catabolic process, GO:0007275: multicellular organismal development, GO:0008237: metallopeptidase activity, GO:0008270: zinc ion binding, GO:0031012: extracellular matrix, GO:0045636: positive regulation of melanocyte differe…		6.3171	6.31585	8.53267	8.56283	6.10005	6.00341	7.74051	7.61351
1948	EFNB2	ephrin-B2	GO:0001945: lymph vessel development, GO:0002042: cell migration involved in sprouting angiogenesis, GO:0005886: plasma membrane, GO:0005887: integral to plasma membrane, GO:0007155: cell adhesion, GO:0007219: Notch signaling pathway, GO:0007267: cell-cell signaling, GO:0007399: nervous system development, GO:0009653: anatomical structure morphogenesis, GO:0009887: organ morphogenesis, GO:0030154…	04360: Axon guidance	6.02472	5.93954	8.09095	7.85747	5.87405	5.78939	6.99461	6.78462
50640	PNPLA8	patatin-like phospholipase domain containing 8	GO:0000139: Golgi membrane, GO:0004622: lysophospholipase activity, GO:0005524: ATP binding, GO:0005622: intracellular, GO:0005778: peroxisomal membrane, GO:0005789: endoplasmic reticulum membrane, GO:0006631: fatty acid metabolic process, GO:0016021: integral to membrane, GO:0016042: lipid catabolic process, GO:0047499: calcium-independent phospholipase A2 activity, GO:0048471: perinuclear regio…		8.07159	8.07231	8.64062	8.6106	8.12277	8.0555	8.39185	8.33546
84640	USP38	ubiquitin specific peptidase 38	GO:0004221: ubiquitin thiolesterase activity, GO:0006511: ubiquitin-dependent protein catabolic process, GO:0008234: cysteine-type peptidase activity		7.28858	7.28058	8.38509	8.31582	7.35134	7.35673	7.92701	7.88583
7586	ZKSCAN1	zinc finger with KRAB and SCAN domains 1	GO:0003677: DNA binding, GO:0003700: sequence-specific DNA binding transcription factor activity, GO:0005634: nucleus, GO:0005634: nucleus, GO:0005739: mitochondrion, GO:0006351: transcription, DNA-dependent, GO:0006355: regulation of transcription, DNA-dependent, GO:0008270: zinc ion binding, GO:0016032: viral reproduction		8.38096	8.38718	9.12183	9.1388	8.49575	8.37828	8.66395	8.66138
51315	KRCC1	lysine-rich coiled-coil 1			6.56122	6.63653	8.01697	7.9618	6.64651	6.50638	7.08833	7.02305
1437	CSF2	colony stimulating factor 2 (granulocyte-macrophage)	GO:0001892: embryonic placenta development, GO:0005125: cytokine activity, GO:0005129: granulocyte macrophage colony-stimulating factor receptor binding, GO:0005515: protein binding, GO:0005576: extracellular region, GO:0005615: extracellular space, GO:0006955: immune response, GO:0008083: growth factor activity, GO:0008284: positive regulation of cell proliferation, GO:0010628: positive regulati…	04060: Cytokine-cytokine receptor interaction, 04630: Jak-STAT signaling pathway, 04640: Hematopoietic cell lineage, 04650: Natural killer cell mediated cytotoxicity, 04660: T cell receptor signaling pathway, 04664: Fc epsilon RI signaling pathway, 05146: Amoebiasis, 05323: Rheumatoid arthritis	4.62297	4.47392	5.93494	5.84286	4.58406	4.47837	4.97782	4.70104
11320	MGAT4A	mannosyl (alpha-1,3-)-glycoprotein beta-1,4-N-acetylglucosaminyltransferase, isozyme A	GO:0000139: Golgi membrane, GO:0005576: extracellular region, GO:0006491: N-glycan processing, GO:0008454: alpha-1,3-mannosylglycoprotein 4-beta-N-acetylglucosaminyltransferase activity, GO:0016021: integral to membrane, GO:0018279: protein N-linked glycosylation via asparagine, GO:0043687: post-translational protein modification, GO:0044267: cellular protein metabolic process, GO:0046872: metal …	00510: N-Glycan biosynthesis, 01100: Metabolic pathways	1.74362	1.66378	3.62183	3.64965	2.14737	2.03933	2.73225	2.34933
283991	FAM100B	family with sequence similarity 100, member B			7.67752	7.61725	8.08029	8.12583	7.77555	7.67468	7.83881	7.75658
81631	MAP1LC3B	microtubule-associated protein 1 light chain 3 beta	GO:0000421: autophagic vacuole membrane, GO:0005515: protein binding, GO:0005622: intracellular, GO:0005776: autophagic vacuole, GO:0005874: microtubule, GO:0006914: autophagy, GO:0012505: endomembrane system, GO:0031090: organelle membrane, GO:0031410: cytoplasmic vesicle		6.15349	6.10282	6.88383	7.03223	6.32864	6.1968	6.57372	6.56045
734	OSGIN2	oxidative stress induced growth inhibitor family member 2	GO:0003674: molecular_function, GO:0005575: cellular_component, GO:0007126: meiosis, GO:0007281: germ cell development		6.56047	6.57127	7.62022	7.63427	6.67291	6.61341	7.0874	7.04063
84275	SLC25A33	solute carrier family 25 (pyrimidine nucleotide carrier), member 33	GO:0005743: mitochondrial inner membrane, GO:0006810: transport, GO:0016021: integral to membrane		5.55909	5.73991	7.18089	7.31182	5.85767	5.72413	6.44688	6.37375
10838	ZNF275	zinc finger protein 275	GO:0003677: DNA binding, GO:0005634: nucleus, GO:0006351: transcription, DNA-dependent, GO:0006355: regulation of transcription, DNA-dependent, GO:0008270: zinc ion binding		6.29281	6.34849	7.35323	7.53053	6.40156	6.48338	6.87559	6.82434
57035	C1orf63	chromosome 1 open reading frame 63			6.86651	6.7972	7.51268	7.69766	7.00036	6.85656	7.09626	7.12779
7555	CNBP	CCHC-type zinc finger, nucleic acid binding protein	GO:0003677: DNA binding, GO:0003700: sequence-specific DNA binding transcription factor activity, GO:0005634: nucleus, GO:0005783: endoplasmic reticulum, GO:0005829: cytosol, GO:0006351: transcription, DNA-dependent, GO:0006355: regulation of transcription, DNA-dependent, GO:0006695: cholesterol biosynthetic process, GO:0008270: zinc ion binding, GO:0008284: positive regulation of cell proliferat…		9.58889	9.6379	9.87651	9.93979	9.6483	9.63255	9.69828	9.70456
84883	AIFM2	apoptosis-inducing factor, mitochondrion-associated, 2	GO:0003677: DNA binding, GO:0004174: electron-transferring-flavoprotein dehydrogenase activity, GO:0005737: cytoplasm, GO:0005739: mitochondrion, GO:0005741: mitochondrial outer membrane, GO:0005811: lipid particle, GO:0005829: cytosol, GO:0006917: induction of apoptosis, GO:0006917: induction of apoptosis, GO:0008637: apoptotic mitochondrial changes, GO:0016021: integral to membrane, GO:0030261:…		6.89216	6.95734	7.39844	7.47147	6.87149	6.87885	7.01077	6.94201
55608	ANKRD10	ankyrin repeat domain 10			7.64783	7.60674	8.09621	8.23466	7.56635	7.58845	7.75389	7.68528
9734	HDAC9	histone deacetylase 9	GO:0000118: histone deacetylase complex, GO:0000122: negative regulation of transcription from RNA polymerase II promoter, GO:0003714: transcription corepressor activity, GO:0004407: histone deacetylase activity, GO:0005080: protein kinase C binding, GO:0005515: protein binding, GO:0005634: nucleus, GO:0005634: nucleus, GO:0005667: transcription factor complex, GO:0005737: cytoplasm, GO:0005737: …		6.95076	6.83979	7.80869	7.88998	6.59617	6.68562	6.95422	6.94728
79753	SNIP1	Smad nuclear interacting protein 1	GO:0005515: protein binding, GO:0005634: nucleus, GO:0005737: cytoplasm, GO:0006355: regulation of transcription, DNA-dependent, GO:0007249: I-kappaB kinase/NF-kappaB cascade, GO:0035196: production of miRNAs involved in gene silencing by miRNA		6.97805	6.90382	7.53148	7.58749	6.7538	6.81343	6.94051	6.98968
79003	MIS12	MIS12, MIND kinetochore complex component, homolog (S. pombe)	GO:0000087: M phase of mitotic cell cycle, GO:0000236: mitotic prometaphase, GO:0000278: mitotic cell cycle, GO:0000444: MIS12/MIND type complex, GO:0005515: protein binding, GO:0005634: nucleus, GO:0005829: cytosol, GO:0007059: chromosome segregation, GO:0051301: cell division, GO:0051382: kinetochore assembly		6.98369	6.90615	8.50218	8.42395	6.6433	6.57067	7.15992	6.9641
79157	MFSD11	major facilitator superfamily domain containing 11	GO:0003674: molecular_function, GO:0005575: cellular_component, GO:0008150: biological_process, GO:0016021: integral to membrane		6.25844	6.27632	6.86941	6.99862	6.17094	6.04866	6.27472	6.27821
7358	UGDH	UDP-glucose 6-dehydrogenase	GO:0001702: gastrulation with mouth forming second, GO:0003979: UDP-glucose 6-dehydrogenase activity, GO:0005829: cytosol, GO:0006011: UDP-glucose metabolic process, GO:0006024: glycosaminoglycan biosynthetic process, GO:0006065: UDP-glucuronate biosynthetic process, GO:0006065: UDP-glucuronate biosynthetic process, GO:0006805: xenobiotic metabolic process, GO:0009055: electron carrier activity, …	00040: Pentose and glucuronate interconversions, 00053: Ascorbate and aldarate metabolism, 00500: Starch and sucrose metabolism, 00520: Amino sugar and nucleotide sugar metabolism, 01100: Metabolic pathways	8.82013	8.91241	9.5628	9.55952	8.61239	8.53813	8.96419	8.96569
5611	DNAJC3	DnaJ (Hsp40) homolog, subfamily C, member 3	GO:0004860: protein kinase inhibitor activity, GO:0005737: cytoplasm, GO:0005788: endoplasmic reticulum lumen, GO:0006457: protein folding, GO:0006469: negative regulation of protein kinase activity, GO:0006987: activation of signaling protein activity involved in unfolded protein response, GO:0009615: response to virus, GO:0030968: endoplasmic reticulum unfolded protein response, GO:0031072: hea…	04141: Protein processing in endoplasmic reticulum	8.32483	8.4136	9.47732	9.54784	7.89874	7.71646	8.38282	8.4366
7150	TOP1	topoisomerase (DNA) I	GO:0000228: nuclear chromosome, GO:0000932: cytoplasmic mRNA processing body, GO:0003677: DNA binding, GO:0003682: chromatin binding, GO:0003917: DNA topoisomerase type I activity, GO:0003918: DNA topoisomerase (ATP-hydrolyzing) activity, GO:0005515: protein binding, GO:0005524: ATP binding, GO:0005634: nucleus, GO:0005654: nucleoplasm, GO:0005730: nucleolus, GO:0006260: DNA replication, GO:00062…		9.35497	9.30163	9.8203	9.81554	9.13455	9.12139	9.39777	9.38394
28962	OSTM1	osteopetrosis associated transmembrane protein 1	GO:0005765: lysosomal membrane, GO:0005829: cytosol, GO:0016021: integral to membrane, GO:0030316: osteoclast differentiation		9.00876	9.08463	9.52347	9.4984	8.79546	8.74508	9.00019	9.00352
51726	DNAJB11	DnaJ (Hsp40) homolog, subfamily B, member 11	GO:0005634: nucleus, GO:0005783: endoplasmic reticulum, GO:0005783: endoplasmic reticulum, GO:0005788: endoplasmic reticulum lumen, GO:0006457: protein folding, GO:0006987: activation of signaling protein activity involved in unfolded protein response, GO:0016556: mRNA modification, GO:0030968: endoplasmic reticulum unfolded protein response, GO:0031072: heat shock protein binding, GO:0051082: un…	04141: Protein processing in endoplasmic reticulum	8.41456	8.5088	9.42626	9.425	8.02001	7.95665	8.33737	8.38216
56257	MEPCE	methylphosphate capping enzyme	GO:0008168: methyltransferase activity		8.38602	8.36675	8.94873	8.969	8.18525	8.09306	8.18367	8.19278
10105	PPIF	peptidylprolyl isomerase F	GO:0003755: peptidyl-prolyl cis-trans isomerase activity, GO:0005743: mitochondrial inner membrane, GO:0005759: mitochondrial matrix, GO:0006457: protein folding, GO:0016018: cyclosporin A binding, GO:0042981: regulation of apoptotic process, GO:0046902: regulation of mitochondrial membrane permeability	05145: Toxoplasmosis	10.0952	10.0977	10.809	10.8645	9.801	9.74115	9.90711	9.95451
80267	EDEM3	ER degradation enhancer, mannosidase alpha-like 3	GO:0004569: glycoprotein endo-alpha-1,2-mannosidase activity, GO:0004571: mannosyl-oligosaccharide 1,2-alpha-mannosidase activity, GO:0005509: calcium ion binding, GO:0005788: endoplasmic reticulum lumen, GO:0005789: endoplasmic reticulum membrane, GO:0006457: protein folding, GO:0006516: glycoprotein catabolic process, GO:0006986: response to unfolded protein, GO:0018279: protein N-linked glycos…	04141: Protein processing in endoplasmic reticulum	7.06218	7.022	7.39483	7.48142	6.85143	6.80996	6.86489	6.9132
116496	FAM129A	family with sequence similarity 129, member A	GO:0001933: negative regulation of protein phosphorylation, GO:0001934: positive regulation of protein phosphorylation, GO:0003674: molecular_function, GO:0005634: nucleus, GO:0005737: cytoplasm, GO:0005886: plasma membrane, GO:0034976: response to endoplasmic reticulum stress, GO:0045727: positive regulation of translation		9.63094	9.67537	9.9901	10.0265	9.41456	9.42223	9.51977	9.53537
23219	FBXO28	F-box protein 28			7.85478	7.83121	8.15967	8.18684	7.80593	7.7674	7.75641	7.82924
151188	ARL6IP6	ADP-ribosylation-like factor 6 interacting protein 6	GO:0016021: integral to membrane		6.36959	6.43106	6.84203	6.93554	6.28215	6.3337	6.36547	6.4663
23051	ZHX3	zinc fingers and homeoboxes 3	GO:0003700: sequence-specific DNA binding transcription factor activity, GO:0005515: protein binding, GO:0005634: nucleus, GO:0005730: nucleolus, GO:0005737: cytoplasm, GO:0006351: transcription, DNA-dependent, GO:0008270: zinc ion binding, GO:0030154: cell differentiation, GO:0042803: protein homodimerization activity, GO:0043565: sequence-specific DNA binding, GO:0045669: positive regulation of…		6.82947	6.82113	7.41188	7.32453	6.73576	6.88908	6.88119	6.92668
284023	LOC284023	uncharacterized LOC284023			5.93329	5.85755	7.28764	6.95698	5.97292	6.11916	6.22242	6.27764
163590	TOR1AIP2	torsin A interacting protein 2	GO:0005789: endoplasmic reticulum membrane, GO:0016021: integral to membrane, GO:0031965: nuclear membrane		8.36199	8.39743	8.84138	8.81361	8.42018	8.38722	8.39006	8.40778
100616209	MIR4461	microRNA 4461			6.19118	6.57264	8.06152	7.84805	6.41481	6.36561	6.54106	6.40956
23271	CAMSAP2	calmodulin regulated spectrin-associated protein family, member 2	GO:0005515: protein binding, GO:0005737: cytoplasm, GO:0005874: microtubule, GO:0008017: microtubule binding		8.66177	8.77196	9.16805	9.1251	8.7423	8.76299	8.68612	8.69043
283303	MRGPRG-AS1	MRGPRG antisense RNA 1			3.3112	3.24973	3.83693	3.75504	3.26558	3.35711	3.32274	3.28205
374383	NCR3LG1	natural killer cell cytotoxicity receptor 3 ligand 1	GO:0005198: structural molecule activity, GO:0005886: plasma membrane, GO:0016021: integral to membrane, GO:0019028: viral capsid		6.78103	6.76468	7.76196	7.53305	7.01445	6.99077	6.96269	6.82338
731	C8A	complement component 8, alpha polypeptide	GO:0005576: extracellular region, GO:0005579: membrane attack complex, GO:0005615: extracellular space, GO:0006955: immune response, GO:0006956: complement activation, GO:0006957: complement activation, alternative pathway, GO:0006958: complement activation, classical pathway, GO:0016020: membrane, GO:0019835: cytolysis, GO:0045087: innate immune response	04610: Complement and coagulation cascades, 05020: Prion diseases, 05146: Amoebiasis, 05322: Systemic lupus erythematosus	2.48138	2.52635	3.07127	3.18344	2.63452	2.72945	2.7068	2.4806
163882	CNST	consortin, connexin sorting protein	GO:0005515: protein binding, GO:0005794: Golgi apparatus, GO:0005802: trans-Golgi network, GO:0005886: plasma membrane, GO:0010923: negative regulation of phosphatase activity, GO:0016021: integral to membrane, GO:0019902: phosphatase binding, GO:0030133: transport vesicle, GO:0042998: positive regulation of Golgi to plasma membrane protein transport, GO:0043234: protein complex, GO:0071253: conn…		5.82649	5.88875	6.24842	6.34512	5.92293	5.87523	5.98828	5.8789
729515	TMEM242	transmembrane protein 242	GO:0016021: integral to membrane		6.47753	6.56111	6.83859	6.84509	6.57431	6.59971	6.62013	6.56198
100505983	LOC100505983	uncharacterized LOC100505983			2.42463	2.43324	2.7593	2.75184	2.45772	2.58232	2.47473	2.51469
162394	SLFN5	schlafen family member 5	GO:0005524: ATP binding, GO:0005634: nucleus, GO:0030154: cell differentiation		8.69248	8.77681	9.63407	9.63494	9.09054	9.06786	8.84708	8.99308
2744	GLS	glutaminase	GO:0002087: regulation of respiratory gaseous exchange by neurological system process, GO:0004359: glutaminase activity, GO:0004359: glutaminase activity, GO:0005739: mitochondrion, GO:0005759: mitochondrial matrix, GO:0005829: cytosol, GO:0006537: glutamate biosynthetic process, GO:0006537: glutamate biosynthetic process, GO:0006543: glutamine catabolic process, GO:0006543: glutamine catabolic p…	00250: Alanine, aspartate and glutamate metabolism, 00330: Arginine and proline metabolism, 00471: D-Glutamine and D-glutamate metabolism, 00910: Nitrogen metabolism, 01100: Metabolic pathways, 04964: Proximal tubule bicarbonate reclamation	9.35797	9.41664	9.69387	9.75719	9.49844	9.52097	9.39071	9.45165
4124	MAN2A1	mannosidase, alpha, class 2A, member 1	GO:0000139: Golgi membrane, GO:0001701: in utero embryonic development, GO:0001889: liver development, GO:0004572: mannosyl-oligosaccharide 1,3-1,6-alpha-mannosidase activity, GO:0006013: mannose metabolic process, GO:0006491: N-glycan processing, GO:0007005: mitochondrion organization, GO:0007033: vacuole organization, GO:0007585: respiratory gaseous exchange, GO:0008270: zinc ion binding, GO:00…	00510: N-Glycan biosynthesis, 01100: Metabolic pathways	8.07009	8.10307	8.41877	8.43394	8.15916	8.15028	8.09917	8.13973
406900	MIR106B	microRNA 106b			4.46949	4.44032	5.21071	5.3154	4.55868	4.47527	4.50006	4.62864
22916	NCBP2	nuclear cap binding protein subunit 2, 20kDa	GO:0000166: nucleotide binding, GO:0000184: nuclear-transcribed mRNA catabolic process, nonsense-mediated decay, GO:0000184: nuclear-transcribed mRNA catabolic process, nonsense-mediated decay, GO:0000184: nuclear-transcribed mRNA catabolic process, nonsense-mediated decay, GO:0000339: RNA cap binding, GO:0000340: RNA 7-methylguanosine cap binding, GO:0000387: spliceosomal snRNP assembly, GO:0000…	03013: RNA transport, 03015: mRNA surveillance pathway, 03040: Spliceosome	7.67723	7.58876	8.12728	8.07224	7.74509	7.64354	7.70044	7.7222
140803	TRPM6	transient receptor potential cation channel, subfamily M, member 6	GO:0004674: protein serine/threonine kinase activity, GO:0005262: calcium channel activity, GO:0005515: protein binding, GO:0005524: ATP binding, GO:0009636: response to toxin, GO:0016021: integral to membrane, GO:0016324: apical plasma membrane, GO:0031526: brush border membrane, GO:0046872: metal ion binding		2.99073	2.67344	4.13628	3.92842	3.06196	3.01205	2.73579	3.08853
64924	SLC30A5	solute carrier family 30 (zinc transporter), member 5	GO:0000139: Golgi membrane, GO:0005385: zinc ion transmembrane transporter activity, GO:0005634: nucleus, GO:0005730: nucleolus, GO:0005794: Golgi apparatus, GO:0005887: integral to plasma membrane, GO:0006824: cobalt ion transport, GO:0006829: zinc ion transport, GO:0006882: cellular zinc ion homeostasis, GO:0008270: zinc ion binding, GO:0010043: response to zinc ion, GO:0010155: regulation of p…		7.43472	7.41009	7.65341	7.63328	7.48953	7.41008	7.38597	7.44268
64859	NABP1	nucleic acid binding protein 1	GO:0000724: double-strand break repair via homologous recombination, GO:0003697: single-stranded DNA binding, GO:0003723: RNA binding, GO:0005634: nucleus, GO:0006281: DNA repair, GO:0006974: response to DNA damage stimulus, GO:0010212: response to ionizing radiation, GO:0031576: G2/M transition checkpoint, GO:0070876: SOSS complex		8.35321	8.29656	9.01756	9.15887	8.33784	8.24287	8.12787	8.00131
2114	ETS2	v-ets erythroblastosis virus E26 oncogene homolog 2 (avian)	GO:0000977: RNA polymerase II regulatory region sequence-specific DNA binding, GO:0001501: skeletal system development, GO:0003677: DNA binding, GO:0003700: sequence-specific DNA binding transcription factor activity, GO:0005515: protein binding, GO:0005634: nucleus, GO:0006355: regulation of transcription, DNA-dependent, GO:0035259: glucocorticoid receptor binding, GO:0045893: positive regulatio…	04320: Dorso-ventral axis formation	9.8412	9.80246	10.0675	10.1013	9.83491	9.88075	9.77478	9.75733
57520	HECW2	HECT, C2 and WW domain containing E3 ubiquitin protein ligase 2	GO:0004842: ubiquitin-protein ligase activity, GO:0005634: nucleus, GO:0005737: cytoplasm, GO:0042787: protein ubiquitination involved in ubiquitin-dependent protein catabolic process		4.99451	4.85154	5.46216	5.42418	4.72945	4.82571	4.81919	4.76269
6400	SEL1L	sel-1 suppressor of lin-12-like (C. elegans)	GO:0005515: protein binding, GO:0005789: endoplasmic reticulum membrane, GO:0007219: Notch signaling pathway, GO:0016021: integral to membrane	04141: Protein processing in endoplasmic reticulum	8.38661	8.38478	9.3712	9.31114	8.17656	8.22596	8.27208	8.17516
440026	TMEM41B	transmembrane protein 41B	GO:0016021: integral to membrane		7.19687	7.20408	8.20907	8.22711	7.0246	7.05886	7.10804	7.02332
1540	CYLD	cylindromatosis (turban tumor syndrome)	GO:0004221: ubiquitin thiolesterase activity, GO:0004843: ubiquitin-specific protease activity, GO:0005515: protein binding, GO:0005829: cytosol, GO:0005829: cytosol, GO:0005881: cytoplasmic microtubule, GO:0006511: ubiquitin-dependent protein catabolic process, GO:0006917: induction of apoptosis, GO:0007049: cell cycle, GO:0007346: regulation of mitotic cell cycle, GO:0008270: zinc ion binding, …	04380: Osteoclast differentiation, 04622: RIG-I-like receptor signaling pathway	7.27058	7.24008	7.69114	7.67768	7.16946	7.25	7.22266	7.19483
1933	EEF1B2	eukaryotic translation elongation factor 1 beta 2	GO:0003746: translation elongation factor activity, GO:0005515: protein binding, GO:0005829: cytosol, GO:0005853: eukaryotic translation elongation factor 1 complex, GO:0006412: translation, GO:0006414: translational elongation, GO:0006414: translational elongation, GO:0010467: gene expression, GO:0044267: cellular protein metabolic process		6.80765	6.75938	7.2142	7.28762	6.62589	6.67411	6.66863	6.65921
9255	AIMP1	aminoacyl tRNA synthetase complex-interacting multifunctional protein 1	GO:0000049: tRNA binding, GO:0001525: angiogenesis, GO:0001937: negative regulation of endothelial cell proliferation, GO:0005125: cytokine activity, GO:0005615: extracellular space, GO:0005634: nucleus, GO:0005783: endoplasmic reticulum, GO:0005794: Golgi apparatus, GO:0005829: cytosol, GO:0006006: glucose metabolic process, GO:0006418: tRNA aminoacylation for protein translation, GO:0006915: ap…		8.40136	8.39915	8.62319	8.66685	8.35428	8.348	8.35562	8.33844
26156	RSL1D1	ribosomal L1 domain containing 1	GO:0003723: RNA binding, GO:0003735: structural constituent of ribosome, GO:0005730: nucleolus, GO:0006412: translation, GO:0015934: large ribosomal subunit, GO:0032880: regulation of protein localization		9.92504	9.94065	9.88845	9.91439	10.0111	10.0523	9.82168	9.86181
6665	SOX15	SRY (sex determining region Y)-box 15	GO:0003677: DNA binding, GO:0003700: sequence-specific DNA binding transcription factor activity, GO:0005634: nucleus, GO:0006325: chromatin organization, GO:0006355: regulation of transcription, DNA-dependent, GO:0006357: regulation of transcription from RNA polymerase II promoter, GO:0008584: male gonad development		4.38048	4.39039	4.32392	4.37564	4.5522	4.54718	4.23257	4.31423
50484	RRM2B	ribonucleotide reductase M2 B (TP53 inducible)	GO:0001822: kidney development, GO:0003014: renal system process, GO:0004748: ribonucleoside-diphosphate reductase activity, thioredoxin disulfide as acceptor, GO:0005634: nucleus, GO:0005654: nucleoplasm, GO:0005737: cytoplasm, GO:0005739: mitochondrion, GO:0006264: mitochondrial DNA replication, GO:0006281: DNA repair, GO:0006979: response to oxidative stress, GO:0009186: deoxyribonucleoside di…	00230: Purine metabolism, 00240: Pyrimidine metabolism, 00480: Glutathione metabolism, 01100: Metabolic pathways, 04115: p53 signaling pathway	5.99172	6.04996	5.95137	5.89058	6.30417	6.2845	5.61921	5.68495
8848	TSC22D1	TSC22 domain family, member 1	GO:0003700: sequence-specific DNA binding transcription factor activity, GO:0005634: nucleus, GO:0005737: cytoplasm, GO:0006366: transcription from RNA polymerase II promoter, GO:0008284: positive regulation of cell proliferation, GO:0043065: positive regulation of apoptotic process, GO:0043066: negative regulation of apoptotic process		8.05038	8.00902	7.89189	7.86625	8.39642	8.27952	7.60367	7.75384
664709	HNRNPA1P10	heterogeneous nuclear ribonucleoprotein A1 pseudogene 10			10.9399	10.9663	10.913	10.9314	11.0463	11.0224	10.8407	10.881
51715	RAB23	RAB23, member RAS oncogene family	GO:0005525: GTP binding, GO:0005886: plasma membrane, GO:0007264: small GTPase mediated signal transduction, GO:0008589: regulation of smoothened signaling pathway, GO:0015031: protein transport, GO:0021513: spinal cord dorsal/ventral patterning, GO:0042733: embryonic digit morphogenesis, GO:0045861: negative regulation of proteolysis	04340: Hedgehog signaling pathway	7.14147	7.23317	7.05463	7.125	7.39547	7.43666	6.8967	6.83064
342357	ZKSCAN2	zinc finger with KRAB and SCAN domains 2	GO:0003674: molecular_function, GO:0003677: DNA binding, GO:0003700: sequence-specific DNA binding transcription factor activity, GO:0005575: cellular_component, GO:0005634: nucleus, GO:0006351: transcription, DNA-dependent, GO:0008150: biological_process, GO:0008270: zinc ion binding, GO:0016032: viral reproduction		4.90818	5.03117	4.76132	4.78622	5.5243	5.33855	4.58183	4.45364
22943	DKK1	dickkopf 1 homolog (Xenopus laevis)	GO:0000122: negative regulation of transcription from RNA polymerase II promoter, GO:0000122: negative regulation of transcription from RNA polymerase II promoter, GO:0000904: cell morphogenesis involved in differentiation, GO:0001706: endoderm formation, GO:0001707: mesoderm formation, GO:0001942: hair follicle development, GO:0002090: regulation of receptor internalization, GO:0004871: signal t…	04310: Wnt signaling pathway	10.7164	10.7244	10.5888	10.6297	10.9675	10.9085	10.534	10.5852
11009	IL24	interleukin 24	GO:0005125: cytokine activity, GO:0005615: extracellular space, GO:0006915: apoptotic process	04060: Cytokine-cytokine receptor interaction, 04630: Jak-STAT signaling pathway	5.35117	5.27725	4.41773	4.608	7.33351	7.11021	4.72916	4.66515
2247	FGF2	fibroblast growth factor 2 (basic)	GO:0000186: activation of MAPKK activity, GO:0000187: activation of MAPK activity, GO:0000189: MAPK import into nucleus, GO:0001658: branching involved in ureteric bud morphogenesis, GO:0001759: organ induction, GO:0001938: positive regulation of endothelial cell proliferation, GO:0002042: cell migration involved in sprouting angiogenesis, GO:0002042: cell migration involved in sprouting angiogen…	04010: MAPK signaling pathway, 04810: Regulation of actin cytoskeleton, 05200: Pathways in cancer, 05218: Melanoma	10.8283	10.8211	10.4559	10.4558	11.1175	11.0661	10.5463	10.5611
22836	RHOBTB3	Rho-related BTB domain containing 3	GO:0005515: protein binding, GO:0005524: ATP binding, GO:0005525: GTP binding, GO:0005794: Golgi apparatus, GO:0006200: ATP catabolic process, GO:0007264: small GTPase mediated signal transduction, GO:0016887: ATPase activity, GO:0017137: Rab GTPase binding, GO:0042147: retrograde transport, endosome to Golgi		9.45475	9.47778	9.13174	9.17697	9.62063	9.61835	9.17041	9.16254
3005	H1F0	H1 histone family, member 0	GO:0000786: nucleosome, GO:0000790: nuclear chromatin, GO:0003677: DNA binding, GO:0005634: nucleus, GO:0005654: nucleoplasm, GO:0005794: Golgi apparatus, GO:0006309: apoptotic DNA fragmentation, GO:0006334: nucleosome assembly, GO:0006915: apoptotic process, GO:0006921: cellular component disassembly involved in apoptotic process		5.84245	5.8694	4.60843	4.61683	6.2907	6.25576	4.8324	4.76287
5567	PRKACB	protein kinase, cAMP-dependent, catalytic, beta	GO:0000287: magnesium ion binding, GO:0004691: cAMP-dependent protein kinase activity, GO:0005515: protein binding, GO:0005524: ATP binding, GO:0005654: nucleoplasm, GO:0005813: centrosome, GO:0005829: cytosol, GO:0005886: plasma membrane, GO:0005952: cAMP-dependent protein kinase complex, GO:0005975: carbohydrate metabolic process, GO:0006006: glucose metabolic process, GO:0006094: gluconeogenes…	04010: MAPK signaling pathway, 04020: Calcium signaling pathway, 04062: Chemokine signaling pathway, 04114: Oocyte meiosis, 04210: Apoptosis, 04270: Vascular smooth muscle contraction, 04310: Wnt signaling pathway, 04340: Hedgehog signaling pathway, 04540: Gap junction, 04720: Long-term potentiation, 04740: Olfactory transduction, 04742: Taste transduction, 04910: Insulin signaling pathway, 04912…	6.98283	6.971	6.81896	6.80975	7.11605	7.1743	6.7973	6.77497
5924	RASGRF2	Ras protein-specific guanine nucleotide-releasing factor 2	GO:0005089: Rho guanyl-nucleotide exchange factor activity, GO:0005516: calmodulin binding, GO:0005543: phospholipid binding, GO:0005737: cytoplasm, GO:0005789: endoplasmic reticulum membrane, GO:0005829: cytosol, GO:0005886: plasma membrane, GO:0006915: apoptotic process, GO:0007264: small GTPase mediated signal transduction, GO:0007268: synaptic transmission, GO:0008624: induction of apoptosis …	04010: MAPK signaling pathway	7.34476	7.37975	7.35388	7.31693	7.61462	7.69963	7.26442	7.20612
27250	PDCD4	programmed cell death 4 (neoplastic transformation inhibitor)	GO:0003723: RNA binding, GO:0005515: protein binding, GO:0005634: nucleus, GO:0005634: nucleus, GO:0005634: nucleus, GO:0005737: cytoplasm, GO:0005829: cytosol, GO:0006915: apoptotic process, GO:0007569: cell aging, GO:0043508: negative regulation of JUN kinase activity, GO:0045786: negative regulation of cell cycle, GO:0045892: negative regulation of transcription, DNA-dependent, GO:0045892: neg…		7.24322	7.37313	7.23898	7.24546	7.70341	7.72638	7.15558	7.04938
100616179	MIR4498	microRNA 4498			1.39176	1.41239	1.42709	1.3977	1.57442	1.59768	1.41239	1.33021
6542	SLC7A2	solute carrier family 7 (cationic amino acid transporter, y+ system), member 2	GO:0000064: L-ornithine transmembrane transporter activity, GO:0002537: nitric oxide production involved in inflammatory response, GO:0005289: high affinity arginine transmembrane transporter activity, GO:0005737: cytoplasm, GO:0005886: plasma membrane, GO:0005887: integral to plasma membrane, GO:0006520: cellular amino acid metabolic process, GO:0006809: nitric oxide biosynthetic process, GO:000…		5.63327	5.51213	5.76683	5.51922	6.34909	6.47148	5.22163	5.30438
162417	NAGS	N-acetylglutamate synthase	GO:0000050: urea cycle, GO:0004042: acetyl-CoA:L-glutamate N-acetyltransferase activity, GO:0005759: mitochondrial matrix, GO:0006526: arginine biosynthetic process, GO:0006536: glutamate metabolic process, GO:0034641: cellular nitrogen compound metabolic process, GO:0044281: small molecule metabolic process	00330: Arginine and proline metabolism, 01100: Metabolic pathways	4.44931	4.41737	4.48656	4.33988	4.66365	4.75199	4.28295	4.25043
79627	OGFRL1	opioid growth factor receptor-like 1	GO:0004872: receptor activity, GO:0016020: membrane		9.13097	9.05548	9.11609	9.09948	9.40823	9.38225	8.89409	8.93594
1842	ECM2	extracellular matrix protein 2, female organ and adipocyte specific	GO:0005178: integrin binding, GO:0005578: proteinaceous extracellular matrix, GO:0005614: interstitial matrix, GO:0007160: cell-matrix adhesion, GO:0008201: heparin binding, GO:0010811: positive regulation of cell-substrate adhesion, GO:0030198: extracellular matrix organization, GO:0070052: collagen V binding		2.37951	2.25072	2.23522	2.30405	3.22457	3.11463	1.91237	2.22432
4141	MARS	methionyl-tRNA synthetase	GO:0000049: tRNA binding, GO:0004825: methionine-tRNA ligase activity, GO:0005524: ATP binding, GO:0005737: cytoplasm, GO:0005739: mitochondrion, GO:0005829: cytosol, GO:0006418: tRNA aminoacylation for protein translation, GO:0006431: methionyl-tRNA aminoacylation, GO:0010467: gene expression	00450: Selenocompound metabolism, 00970: Aminoacyl-tRNA biosynthesis	9.11293	9.15376	8.89147	8.87333	9.52302	9.48112	9.02371	9.05972
3569	IL6	interleukin 6 (interferon, beta 2)	GO:0001781: neutrophil apoptotic process, GO:0002384: hepatic immune response, GO:0002384: hepatic immune response, GO:0002446: neutrophil mediated immunity, GO:0002548: monocyte chemotaxis, GO:0002675: positive regulation of acute inflammatory response, GO:0002690: positive regulation of leukocyte chemotaxis, GO:0005125: cytokine activity, GO:0005125: cytokine activity, GO:0005138: interleukin-6…	04060: Cytokine-cytokine receptor interaction, 04620: Toll-like receptor signaling pathway, 04621: NOD-like receptor signaling pathway, 04623: Cytosolic DNA-sensing pathway, 04630: Jak-STAT signaling pathway, 04640: Hematopoietic cell lineage, 04672: Intestinal immune network for IgA production, 05020: Prion diseases, 05142: Chagas disease (American trypanosomiasis), 05143: African trypanosomiasi…	6.06588	6.32162	4.39178	4.20853	8.66639	8.64722	5.72802	5.93763
728215	FAM155A	family with sequence similarity 155, member A	GO:0016021: integral to membrane		7.64121	7.60076	7.44871	7.44642	8.07894	8.06965	7.57251	7.633
7292	TNFSF4	tumor necrosis factor (ligand) superfamily, member 4	GO:0002215: defense response to nematode, GO:0002526: acute inflammatory response, GO:0002726: positive regulation of T cell cytokine production, GO:0002819: regulation of adaptive immune response, GO:0002830: positive regulation of type 2 immune response, GO:0002891: positive regulation of immunoglobulin mediated immune response, GO:0005102: receptor binding, GO:0005125: cytokine activity, GO:00…	04060: Cytokine-cytokine receptor interaction	5.52958	5.39768	4.56911	4.33733	7.25409	7.22109	5.23373	5.04708
286144	TRIQK	triple QxxK/R motif containing	GO:0005789: endoplasmic reticulum membrane, GO:0016021: integral to membrane		6.35965	6.34163	6.12015	6.13305	6.79398	6.73301	6.27936	6.27469
158586	ZXDB	zinc finger, X-linked, duplicated B	GO:0003674: molecular_function, GO:0003676: nucleic acid binding, GO:0005634: nucleus, GO:0006351: transcription, DNA-dependent, GO:0006355: regulation of transcription, DNA-dependent, GO:0008150: biological_process, GO:0008270: zinc ion binding		5.98218	6.08111	5.89492	5.9119	6.61049	6.59411	6.04147	6.05397
7412	VCAM1	vascular cell adhesion molecule 1	GO:0001666: response to hypoxia, GO:0002102: podosome, GO:0002526: acute inflammatory response, GO:0002544: chronic inflammatory response, GO:0005178: integrin binding, GO:0005615: extracellular space, GO:0005886: plasma membrane, GO:0005902: microvillus, GO:0007155: cell adhesion, GO:0007157: heterophilic cell-cell adhesion, GO:0007159: leukocyte cell-cell adhesion, GO:0007507: heart development…	04514: Cell adhesion molecules (CAMs), 04670: Leukocyte transendothelial migration, 05143: African trypanosomiasis, 05144: Malaria	4.12146	4.2131	3.35105	3.52235	6.0657	6.12287	4.24978	4.40608
100506190	LOC100506190	uncharacterized LOC100506190			6.6429	6.66055	6.48776	6.5044	7.30944	7.2636	6.78108	6.79803
3624	INHBA	inhibin, beta A	GO:0000082: G1/S transition of mitotic cell cycle, GO:0001541: ovarian follicle development, GO:0001541: ovarian follicle development, GO:0001942: hair follicle development, GO:0002244: hemopoietic progenitor cell differentiation, GO:0005125: cytokine activity, GO:0005179: hormone activity, GO:0005515: protein binding, GO:0005576: extracellular region, GO:0005576: extracellular region, GO:0006357…	04060: Cytokine-cytokine receptor interaction, 04350: TGF-beta signaling pathway	8.04104	8.17826	7.68804	7.75796	9.26447	9.24537	8.31536	8.31216
4982	TNFRSF11B	tumor necrosis factor receptor superfamily, member 11b	GO:0001501: skeletal system development, GO:0004872: receptor activity, GO:0005125: cytokine activity, GO:0005576: extracellular region, GO:0005578: proteinaceous extracellular matrix, GO:0005615: extracellular space, GO:0006915: apoptotic process, GO:0007165: signal transduction, GO:0007584: response to nutrient, GO:0030198: extracellular matrix organization, GO:0032026: response to magnesium io…	04060: Cytokine-cytokine receptor interaction, 04380: Osteoclast differentiation	6.10634	6.06488	5.50212	5.3925	8.5866	8.50671	6.9982	7.01382
9076	CLDN1	claudin 1	GO:0005198: structural molecule activity, GO:0005887: integral to plasma membrane, GO:0005923: tight junction, GO:0007155: cell adhesion, GO:0016021: integral to membrane, GO:0016328: lateral plasma membrane, GO:0016338: calcium-independent cell-cell adhesion, GO:0042802: identical protein binding, GO:0044419: interspecies interaction between organisms, GO:0045216: cell-cell junction organization	04514: Cell adhesion molecules (CAMs), 04530: Tight junction, 04670: Leukocyte transendothelial migration, 05130: Pathogenic Escherichia coli infection, 05160: Hepatitis C	6.59928	6.66572	6.54557	6.56812	7.93042	7.84791	6.94625	6.89825
56915	EXOSC5	exosome component 5	GO:0000175: 3'-5'-exoribonuclease activity, GO:0000178: exosome (RNase complex), GO:0000288: nuclear-transcribed mRNA catabolic process, deadenylation-dependent decay, GO:0003723: RNA binding, GO:0005515: protein binding, GO:0005730: nucleolus, GO:0005737: cytoplasm, GO:0005829: cytosol, GO:0006364: rRNA processing, GO:0010467: gene expression, GO:0016070: RNA metabolic process, GO:0016071: mRNA …	03018: RNA degradation	7.72621	7.71399	7.70357	7.72594	8.35488	8.21906	7.89225	7.91857
26227	PHGDH	phosphoglycerate dehydrogenase	GO:0004617: phosphoglycerate dehydrogenase activity, GO:0005829: cytosol, GO:0006541: glutamine metabolic process, GO:0006544: glycine metabolic process, GO:0006564: L-serine biosynthetic process, GO:0006566: threonine metabolic process, GO:0007420: brain development, GO:0008652: cellular amino acid biosynthetic process, GO:0009055: electron carrier activity, GO:0009448: gamma-aminobutyric acid m…	00260: Glycine, serine and threonine metabolism, 01100: Metabolic pathways	8.94327	8.99188	8.97665	8.94738	9.52864	9.47892	9.13802	9.19148
124961	ZFP3	zinc finger protein 3 homolog (mouse)	GO:0003674: molecular_function, GO:0003677: DNA binding, GO:0005575: cellular_component, GO:0005634: nucleus, GO:0006351: transcription, DNA-dependent, GO:0006355: regulation of transcription, DNA-dependent, GO:0008150: biological_process, GO:0008270: zinc ion binding		5.77539	5.77597	5.78253	5.71371	6.25218	6.18767	5.77563	5.87299
6301	SARS	seryl-tRNA synthetase	GO:0003723: RNA binding, GO:0004828: serine-tRNA ligase activity, GO:0005524: ATP binding, GO:0005737: cytoplasm, GO:0005739: mitochondrion, GO:0005829: cytosol, GO:0006412: translation, GO:0006418: tRNA aminoacylation for protein translation, GO:0006434: seryl-tRNA aminoacylation, GO:0008033: tRNA processing, GO:0010467: gene expression, GO:0097056: selenocysteinyl-tRNA(Sec) biosynthetic process	00970: Aminoacyl-tRNA biosynthesis	7.96306	7.91209	7.89512	7.8484	8.28896	8.28813	7.98261	7.99293
27334	P2RY10	purinergic receptor P2Y, G-protein coupled, 10	GO:0005886: plasma membrane, GO:0016021: integral to membrane, GO:0045028: G-protein coupled purinergic nucleotide receptor activity	04080: Neuroactive ligand-receptor interaction	1.73966	1.7697	1.7508	1.73271	1.95954	1.96363	1.77774	1.81639
4790	NFKB1	nuclear factor of kappa light polypeptide gene enhancer in B-cells 1	GO:0000122: negative regulation of transcription from RNA polymerase II promoter, GO:0000122: negative regulation of transcription from RNA polymerase II promoter, GO:0000975: regulatory region DNA binding, GO:0000976: transcription regulatory region sequence-specific DNA binding, GO:0001071: nucleic acid binding transcription factor activity, GO:0002224: toll-like receptor signaling pathway, GO:…	04010: MAPK signaling pathway, 04062: Chemokine signaling pathway, 04210: Apoptosis, 04380: Osteoclast differentiation, 04620: Toll-like receptor signaling pathway, 04621: NOD-like receptor signaling pathway, 04622: RIG-I-like receptor signaling pathway, 04623: Cytosolic DNA-sensing pathway, 04660: T cell receptor signaling pathway, 04662: B cell receptor signaling pathway, 04722: Neurotrophin si…	7.57517	7.62363	7.52944	7.51349	8.06175	8.03591	7.67363	7.76418
3490	IGFBP7	insulin-like growth factor binding protein 7	GO:0001558: regulation of cell growth, GO:0005515: protein binding, GO:0005520: insulin-like growth factor binding, GO:0005615: extracellular space, GO:0007155: cell adhesion, GO:0008285: negative regulation of cell proliferation, GO:0031012: extracellular matrix, GO:0048839: inner ear development		10.38	10.2992	10.461	10.5002	10.7688	10.7287	10.6357	10.6153
135112	NCOA7	nuclear receptor coactivator 7	GO:0005515: protein binding, GO:0005622: intracellular, GO:0005634: nucleus, GO:0006351: transcription, DNA-dependent, GO:0016998: cell wall macromolecule catabolic process, GO:0030374: ligand-dependent nuclear receptor transcription coactivator activity, GO:0035257: nuclear hormone receptor binding, GO:0045944: positive regulation of transcription from RNA polymerase II promoter		7.38633	7.45206	7.68708	7.86388	8.40108	8.29135	8.07112	8.04755
129804	FBLN7	fibulin 7	GO:0005509: calcium ion binding, GO:0005578: proteinaceous extracellular matrix, GO:0007155: cell adhesion, GO:0008201: heparin binding		4.09966	4.01938	4.36031	4.27981	4.65886	4.74176	4.53692	4.55777
1282	COL4A1	collagen, type IV, alpha 1	GO:0001525: angiogenesis, GO:0005201: extracellular matrix structural constituent, GO:0005515: protein binding, GO:0005576: extracellular region, GO:0005576: extracellular region, GO:0005587: collagen type IV, GO:0007411: axon guidance, GO:0007528: neuromuscular junction development, GO:0030855: epithelial cell differentiation, GO:0031012: extracellular matrix, GO:0048407: platelet-derived growth…	04510: Focal adhesion, 04512: ECM-receptor interaction, 04974: Protein digestion and absorption, 05146: Amoebiasis, 05200: Pathways in cancer, 05222: Small cell lung cancer	5.93986	5.86298	6.19274	6.18161	6.40835	6.44201	6.27569	6.32702
3552	IL1A	interleukin 1, alpha	GO:0001660: fever generation, GO:0001666: response to hypoxia, GO:0005125: cytokine activity, GO:0005149: interleukin-1 receptor binding, GO:0005507: copper ion binding, GO:0005515: protein binding, GO:0005576: extracellular region, GO:0005615: extracellular space, GO:0005615: extracellular space, GO:0005829: cytosol, GO:0006915: apoptotic process, GO:0006916: anti-apoptosis, GO:0006954: inflamma…	04010: MAPK signaling pathway, 04060: Cytokine-cytokine receptor interaction, 04210: Apoptosis, 04380: Osteoclast differentiation, 04640: Hematopoietic cell lineage, 04940: Type I diabetes mellitus, 05020: Prion diseases, 05140: Leishmaniasis, 05323: Rheumatoid arthritis, 05332: Graft-versus-host disease	7.64119	7.74539	8.17357	8.17438	9.34582	9.44358	9.25152	9.28447
6352	CCL5	chemokine (C-C motif) ligand 5	GO:0000165: MAPK cascade, GO:0002407: dendritic cell chemotaxis, GO:0002544: chronic inflammatory response, GO:0002548: monocyte chemotaxis, GO:0002676: regulation of chronic inflammatory response, GO:0004435: phosphatidylinositol phospholipase C activity, GO:0004672: protein kinase activity, GO:0005515: protein binding, GO:0005576: extracellular region, GO:0005615: extracellular space, GO:000573…	04060: Cytokine-cytokine receptor interaction, 04062: Chemokine signaling pathway, 04620: Toll-like receptor signaling pathway, 04621: NOD-like receptor signaling pathway, 04623: Cytosolic DNA-sensing pathway, 05020: Prion diseases, 05120: Epithelial cell signaling in Helicobacter pylori infection, 05142: Chagas disease (American trypanosomiasis), 05323: Rheumatoid arthritis	4.63332	4.68993	4.86762	4.8203	5.95664	5.98425	5.57477	5.69898
875	CBS	cystathionine-beta-synthase	GO:0000096: sulfur amino acid metabolic process, GO:0001958: endochondral ossification, GO:0001974: blood vessel remodeling, GO:0004122: cystathionine beta-synthase activity, GO:0004122: cystathionine beta-synthase activity, GO:0005515: protein binding, GO:0005634: nucleus, GO:0005730: nucleolus, GO:0005829: cytosol, GO:0005829: cytosol, GO:0006535: cysteine biosynthetic process from serine, GO:0…	00260: Glycine, serine and threonine metabolism, 00270: Cysteine and methionine metabolism, 01100: Metabolic pathways	5.88467	6.00454	6.06743	5.97171	7.63035	7.78211	7.01	7.11345
4057	LTF	lactotransferrin	GO:0004252: serine-type endopeptidase activity, GO:0005515: protein binding, GO:0005576: extracellular region, GO:0006508: proteolysis, GO:0006826: iron ion transport, GO:0006879: cellular iron ion homeostasis, GO:0006959: humoral immune response, GO:0008199: ferric iron binding, GO:0008201: heparin binding, GO:0030141: secretory granule, GO:0042742: defense response to bacterium		5.71354	5.55954	5.71719	5.67167	7.63164	7.66029	7.10344	7.05523
114897	C1QTNF1	C1q and tumor necrosis factor related protein 1	GO:0005581: collagen, GO:0005615: extracellular space, GO:0010906: regulation of glucose metabolic process, GO:0043410: positive regulation of MAPK cascade, GO:0051260: protein homooligomerization, GO:0051897: positive regulation of protein kinase B signaling cascade, GO:0070208: protein heterotrimerization		7.16668	7.08633	7.0604	7.02676	8.52688	8.50717	8.19356	8.15936
255967	PAN3	PAN3 poly(A) specific ribonuclease subunit homolog (S. cerevisiae)	GO:0000184: nuclear-transcribed mRNA catabolic process, nonsense-mediated decay, GO:0000288: nuclear-transcribed mRNA catabolic process, deadenylation-dependent decay, GO:0000289: nuclear-transcribed mRNA poly(A) tail shortening, GO:0003676: nucleic acid binding, GO:0004672: protein kinase activity, GO:0005524: ATP binding, GO:0005813: centrosome, GO:0005829: cytosol, GO:0008270: zinc ion binding…	03018: RNA degradation	7.42312	7.43772	7.4353	7.40494	7.85446	7.8445	7.72464	7.72576
2995	GYPC	glycophorin C (Gerbich blood group)	GO:0005515: protein binding, GO:0005886: plasma membrane, GO:0005887: integral to plasma membrane, GO:0030863: cortical cytoskeleton	05144: Malaria	6.16432	6.18004	6.05793	6.0963	6.85238	6.82869	6.59268	6.62114
4973	OLR1	oxidized low density lipoprotein (lectin-like) receptor 1	GO:0005041: low-density lipoprotein receptor activity, GO:0005576: extracellular region, GO:0005886: plasma membrane, GO:0005887: integral to plasma membrane, GO:0006508: proteolysis, GO:0006954: inflammatory response, GO:0007159: leukocyte cell-cell adhesion, GO:0007596: blood coagulation, GO:0008015: blood circulation, GO:0008219: cell death, GO:0030246: carbohydrate binding, GO:0042157: lipopr…	03320: PPAR signaling pathway, 04145: Phagosome	5.0719	5.11196	5.03588	5.36439	8.3496	8.07972	7.13491	7.22878
5791	PTPRE	protein tyrosine phosphatase, receptor type, E	GO:0005001: transmembrane receptor protein tyrosine phosphatase activity, GO:0005515: protein binding, GO:0005634: nucleus, GO:0005737: cytoplasm, GO:0005886: plasma membrane, GO:0006468: protein phosphorylation, GO:0006470: protein dephosphorylation, GO:0007185: transmembrane receptor protein tyrosine phosphatase signaling pathway, GO:0016021: integral to membrane, GO:0033003: regulation of mast…		4.79411	4.82945	4.78096	4.81959	5.59236	5.57973	5.28498	5.26558
7453	WARS	tryptophanyl-tRNA synthetase	GO:0001525: angiogenesis, GO:0004830: tryptophan-tRNA ligase activity, GO:0004830: tryptophan-tRNA ligase activity, GO:0005515: protein binding, GO:0005524: ATP binding, GO:0005737: cytoplasm, GO:0005829: cytosol, GO:0006412: translation, GO:0006418: tRNA aminoacylation for protein translation, GO:0006436: tryptophanyl-tRNA aminoacylation, GO:0008285: negative regulation of cell proliferation, GO…	00380: Tryptophan metabolism, 00970: Aminoacyl-tRNA biosynthesis	8.15292	8.09556	8.17321	8.23596	8.62389	8.5332	8.28289	8.26977
285958	SNHG15	small nucleolar RNA host gene 15 (non-protein coding)			6.25805	6.23785	6.41635	6.34776	6.77467	6.77536	6.45189	6.59719
833	CARS	cysteinyl-tRNA synthetase	GO:0000049: tRNA binding, GO:0000049: tRNA binding, GO:0000049: tRNA binding, GO:0004817: cysteine-tRNA ligase activity, GO:0004817: cysteine-tRNA ligase activity, GO:0005515: protein binding, GO:0005524: ATP binding, GO:0005737: cytoplasm, GO:0005737: cytoplasm, GO:0005829: cytosol, GO:0006418: tRNA aminoacylation for protein translation, GO:0006423: cysteinyl-tRNA aminoacylation, GO:0010467: ge…	00970: Aminoacyl-tRNA biosynthesis	8.72256	8.70432	8.88181	8.89419	9.30875	9.15889	8.94577	9.02313
29761	USP25	ubiquitin specific peptidase 25	GO:0004221: ubiquitin thiolesterase activity, GO:0004843: ubiquitin-specific protease activity, GO:0005515: protein binding, GO:0005634: nucleus, GO:0005737: cytoplasm, GO:0006464: cellular protein modification process, GO:0006508: proteolysis, GO:0006511: ubiquitin-dependent protein catabolic process, GO:0008233: peptidase activity, GO:0032183: SUMO binding, GO:0070536: protein K63-linked deubiq…		8.32421	8.31215	8.43473	8.41039	8.87501	8.74414	8.5531	8.54553
6472	SHMT2	serine hydroxymethyltransferase 2 (mitochondrial)	GO:0003682: chromatin binding, GO:0004372: glycine hydroxymethyltransferase activity, GO:0005739: mitochondrion, GO:0005743: mitochondrial inner membrane, GO:0005758: mitochondrial intermembrane space, GO:0005759: mitochondrial matrix, GO:0006564: L-serine biosynthetic process, GO:0006730: one-carbon metabolic process, GO:0008168: methyltransferase activity, GO:0008284: positive regulation of cel…	00260: Glycine, serine and threonine metabolism, 00460: Cyanoamino acid metabolism, 00670: One carbon pool by folate, 01100: Metabolic pathways	8.54358	8.54383	8.6005	8.70234	9.06778	8.99208	8.77833	8.82331
80199	FUZ	fuzzy homolog (Drosophila)	GO:0001736: establishment of planar polarity, GO:0001843: neural tube closure, GO:0001942: hair follicle development, GO:0005737: cytoplasm, GO:0005856: cytoskeleton, GO:0008589: regulation of smoothened signaling pathway, GO:0010172: embryonic body morphogenesis, GO:0015031: protein transport, GO:0042384: cilium assembly, GO:0048704: embryonic skeletal system morphogenesis		5.68666	5.67992	5.69893	5.71739	6.06028	6.0641	5.89379	5.85689
5199	CFP	complement factor properdin	GO:0005576: extracellular region, GO:0005615: extracellular space, GO:0006955: immune response, GO:0006956: complement activation, GO:0006957: complement activation, alternative pathway, GO:0030449: regulation of complement activation, GO:0031012: extracellular matrix, GO:0042742: defense response to bacterium, GO:0045087: innate immune response		3.81425	3.8067	3.84367	3.85273	4.25278	4.1948	4.04302	3.95543
7410	VAV2	vav 2 guanine nucleotide exchange factor	GO:0001525: angiogenesis, GO:0005089: Rho guanyl-nucleotide exchange factor activity, GO:0005154: epidermal growth factor receptor binding, GO:0005515: protein binding, GO:0005543: phospholipid binding, GO:0005829: cytosol, GO:0005886: plasma membrane, GO:0006915: apoptotic process, GO:0007165: signal transduction, GO:0007264: small GTPase mediated signal transduction, GO:0007411: axon guidance, …	04062: Chemokine signaling pathway, 04510: Focal adhesion, 04650: Natural killer cell mediated cytotoxicity, 04660: T cell receptor signaling pathway, 04662: B cell receptor signaling pathway, 04664: Fc epsilon RI signaling pathway, 04666: Fc gamma R-mediated phagocytosis, 04670: Leukocyte transendothelial migration, 04810: Regulation of actin cytoskeleton	7.46871	7.41359	7.46845	7.45694	7.88464	7.8387	7.6205	7.6205
284034	LINC00670	long intergenic non-protein coding RNA 670			2.75986	2.7421	2.94151	2.74791	3.98435	3.98793	3.24789	3.3869
9242	MSC	musculin	GO:0003677: DNA binding, GO:0003700: sequence-specific DNA binding transcription factor activity, GO:0003714: transcription corepressor activity, GO:0005634: nucleus, GO:0006355: regulation of transcription, DNA-dependent, GO:0006366: transcription from RNA polymerase II promoter, GO:0014707: branchiomeric skeletal muscle development, GO:0060021: palate development, GO:0060539: diaphragm developm…		5.64245	5.70888	5.67665	5.64033	7.22353	6.97488	6.43655	6.45916
11259	FILIP1L	filamin A interacting protein 1-like	GO:0003674: molecular_function, GO:0005634: nucleus, GO:0005737: cytoplasm, GO:0008150: biological_process, GO:0016020: membrane, GO:0016459: myosin complex		4.41549	4.43088	4.58686	4.67306	5.44425	5.52595	5.08837	5.07556
27347	STK39	serine threonine kinase 39	GO:0004702: receptor signaling protein serine/threonine kinase activity, GO:0005524: ATP binding, GO:0005634: nucleus, GO:0005737: cytoplasm, GO:0005856: cytoskeleton, GO:0006468: protein phosphorylation, GO:0006950: response to stress, GO:0016323: basolateral plasma membrane, GO:0016324: apical plasma membrane, GO:0019901: protein kinase binding, GO:0023014: signal transduction by phosphorylatio…		8.91836	8.89282	8.96628	8.97392	9.19005	9.2328	9.0708	9.06114
10209	EIF1	eukaryotic translation initiation factor 1	GO:0003743: translation initiation factor activity, GO:0005737: cytoplasm, GO:0006412: translation, GO:0006413: translational initiation, GO:0006413: translational initiation, GO:0006446: regulation of translational initiation, GO:0006950: response to stress, GO:0008135: translation factor activity, nucleic acid binding	03013: RNA transport	10.2931	10.2488	10.3971	10.4944	10.6028	10.6031	10.3943	10.4486
56900	TMEM167B	transmembrane protein 167B	GO:0000139: Golgi membrane, GO:0016021: integral to membrane		7.67288	7.73893	7.86392	7.96331	8.07572	8.14617	7.83519	7.90732
404665	CACTIN-AS1	CACTIN antisense RNA 1			3.81963	3.78425	4.10815	4.17178	4.29219	4.29569	3.9524	4.13011
6510	SLC1A5	solute carrier family 1 (neutral amino acid transporter), member 5	GO:0004872: receptor activity, GO:0005794: Golgi apparatus, GO:0005886: plasma membrane, GO:0005886: plasma membrane, GO:0005887: integral to plasma membrane, GO:0006811: ion transport, GO:0006865: amino acid transport, GO:0006868: glutamine transport, GO:0015175: neutral amino acid transmembrane transporter activity, GO:0015186: L-glutamine transmembrane transporter activity, GO:0015804: neutral…	04974: Protein digestion and absorption	8.83516	8.75278	8.9951	8.96848	9.32505	9.26801	9.05376	9.0115
845	CASQ2	calsequestrin 2 (cardiac muscle)	GO:0002027: regulation of heart rate, GO:0005509: calcium ion binding, GO:0005622: intracellular, GO:0005891: voltage-gated calcium channel complex, GO:0006941: striated muscle contraction, GO:0010649: regulation of cell communication by electrical coupling, GO:0010880: regulation of release of sequestered calcium ion into cytosol by sarcoplasmic reticulum, GO:0010881: regulation of cardiac muscl…		2.70815	2.66323	2.83386	2.78656	2.92645	2.91103	2.82396	2.80019
338645	LUZP2	leucine zipper protein 2	GO:0005576: extracellular region		2.98004	2.85024	3.21829	3.30799	3.69558	3.44198	3.18095	3.16197
256764	WDR72	WD repeat domain 72			2.22462	2.27111	2.39636	2.35619	2.49309	2.58232	2.39588	2.36254
127435	PODN	podocan	GO:0005518: collagen binding, GO:0005578: proteinaceous extracellular matrix, GO:0005615: extracellular space, GO:0005737: cytoplasm, GO:0008285: negative regulation of cell proliferation, GO:0030336: negative regulation of cell migration		3.88212	3.96742	4.24151	4.18022	4.63966	4.64104	4.37327	4.34978
29968	PSAT1	phosphoserine aminotransferase 1	GO:0004648: O-phospho-L-serine:2-oxoglutarate aminotransferase activity, GO:0004648: O-phospho-L-serine:2-oxoglutarate aminotransferase activity, GO:0005829: cytosol, GO:0006564: L-serine biosynthetic process, GO:0006564: L-serine biosynthetic process, GO:0008615: pyridoxine biosynthetic process, GO:0008652: cellular amino acid biosynthetic process, GO:0030170: pyridoxal phosphate binding, GO:003…	00260: Glycine, serine and threonine metabolism, 00750: Vitamin B6 metabolism, 01100: Metabolic pathways	9.59209	9.65406	9.80139	9.80089	10.1037	10.0732	9.81319	9.81733
51621	KLF13	Kruppel-like factor 13	GO:0003677: DNA binding, GO:0005515: protein binding, GO:0005634: nucleus, GO:0006366: transcription from RNA polymerase II promoter, GO:0008270: zinc ion binding, GO:0008285: negative regulation of cell proliferation, GO:0045647: negative regulation of erythrocyte differentiation, GO:0045944: positive regulation of transcription from RNA polymerase II promoter		6.07898	6.04402	6.05694	6.17586	6.58818	6.53643	6.16599	6.0855
125113	KRT222	keratin 222	GO:0005198: structural molecule activity, GO:0005882: intermediate filament		1.83076	1.80891	1.8308	1.98051	2.20247	2.15256	1.87024	1.81333
51320	MEX3C	mex-3 homolog C (C. elegans)	GO:0003723: RNA binding, GO:0005634: nucleus, GO:0005737: cytoplasm, GO:0008270: zinc ion binding, GO:0043231: intracellular membrane-bounded organelle		7.42252	7.45281	7.46636	7.56672	7.70967	7.69281	7.52157	7.51321
55858	TMEM165	transmembrane protein 165	GO:0016021: integral to membrane		8.08277	8.09204	8.12012	8.15465	8.28484	8.23928	8.1585	8.11834
2339	FNTA	farnesyltransferase, CAAX box, alpha	GO:0004660: protein farnesyltransferase activity, GO:0004661: protein geranylgeranyltransferase activity, GO:0004662: CAAX-protein geranylgeranyltransferase activity, GO:0005515: protein binding, GO:0005737: cytoplasm, GO:0005829: cytosol, GO:0005875: microtubule associated complex, GO:0006915: apoptotic process, GO:0006921: cellular component disassembly involved in apoptotic process, GO:0007179…		7.98958	8.03436	8.09337	8.13105	8.31889	8.26846	7.98164	8.1024
10965	ACOT2	acyl-CoA thioesterase 2	GO:0000038: very long-chain fatty acid metabolic process, GO:0001676: long-chain fatty acid metabolic process, GO:0004091: carboxylesterase activity, GO:0005102: receptor binding, GO:0005739: mitochondrion, GO:0006637: acyl-CoA metabolic process, GO:0016290: palmitoyl-CoA hydrolase activity, GO:0047617: acyl-CoA hydrolase activity	01040: Biosynthesis of unsaturated fatty acids	5.76064	5.87395	5.96321	5.96145	6.26962	6.32896	5.90063	6.00478
7128	TNFAIP3	tumor necrosis factor, alpha-induced protein 3	GO:0001922: B-1 B cell homeostasis, GO:0002020: protease binding, GO:0002237: response to molecule of bacterial origin, GO:0002634: regulation of germinal center formation, GO:0003677: DNA binding, GO:0004221: ubiquitin thiolesterase activity, GO:0004842: ubiquitin-protein ligase activity, GO:0004843: ubiquitin-specific protease activity, GO:0004843: ubiquitin-specific protease activity, GO:00055…	04621: NOD-like receptor signaling pathway	8.97185	9.00151	9.05249	9.03891	9.30124	9.39067	9.01609	9.05756
125988	C19orf70	chromosome 19 open reading frame 70	GO:0005739: mitochondrion		5.96161	5.98408	6.04077	6.02214	6.23578	6.17353	6.00896	5.95304
22822	PHLDA1	pleckstrin homology-like domain, family A, member 1	GO:0005515: protein binding, GO:0005543: phospholipid binding, GO:0005634: nucleus, GO:0005886: plasma membrane, GO:0006915: apoptotic process, GO:0006917: induction of apoptosis, GO:0030659: cytoplasmic vesicle membrane, GO:0045210: FasL biosynthetic process		9.63898	9.6058	9.77693	9.7659	10.1423	10.1105	9.53882	9.58501
85028	SNHG12	small nucleolar RNA host gene 12 (non-protein coding)			7.73535	7.64275	7.9617	7.97195	8.22295	8.19963	7.87852	7.78647
16	AARS	alanyl-tRNA synthetase	GO:0000049: tRNA binding, GO:0001942: hair follicle development, GO:0002161: aminoacyl-tRNA editing activity, GO:0004813: alanine-tRNA ligase activity, GO:0005524: ATP binding, GO:0005737: cytoplasm, GO:0005829: cytosol, GO:0006400: tRNA modification, GO:0006418: tRNA aminoacylation for protein translation, GO:0006419: alanyl-tRNA aminoacylation, GO:0006457: protein folding, GO:0008033: tRNA proc…	00970: Aminoacyl-tRNA biosynthesis	9.60481	9.61403	9.7576	9.79474	9.93467	9.94981	9.67322	9.70885
3376	IARS	isoleucyl-tRNA synthetase	GO:0002161: aminoacyl-tRNA editing activity, GO:0004822: isoleucine-tRNA ligase activity, GO:0005515: protein binding, GO:0005524: ATP binding, GO:0005634: nucleus, GO:0005737: cytoplasm, GO:0005829: cytosol, GO:0006418: tRNA aminoacylation for protein translation, GO:0006428: isoleucyl-tRNA aminoacylation, GO:0010467: gene expression	00290: Valine, leucine and isoleucine biosynthesis, 00970: Aminoacyl-tRNA biosynthesis	9.66963	9.64507	9.7337	9.74624	9.80461	9.80712	9.69089	9.63027
23028	KDM1A	lysine (K)-specific demethylase 1A	GO:0000122: negative regulation of transcription from RNA polymerase II promoter, GO:0000122: negative regulation of transcription from RNA polymerase II promoter, GO:0000790: nuclear chromatin, GO:0000790: nuclear chromatin, GO:0002039: p53 binding, GO:0003682: chromatin binding, GO:0005515: protein binding, GO:0005634: nucleus, GO:0005654: nucleoplasm, GO:0005667: transcription factor complex, …		8.91397	9.0143	8.67225	8.72453	9.01889	8.99996	9.07014	9.12444
641648	SNORD87	small nucleolar RNA, C/D box 87			10.2915	10.3148	9.50732	9.57735	10.3764	10.2614	10.4266	10.5416
9644	SH3PXD2A	SH3 and PX domains 2A	GO:0002102: podosome, GO:0005515: protein binding, GO:0005737: cytoplasm, GO:0006801: superoxide metabolic process, GO:0006801: superoxide metabolic process, GO:0007154: cell communication, GO:0030054: cell junction, GO:0035091: phosphatidylinositol binding, GO:0042995: cell projection		5.88762	5.85482	5.39013	5.31711	5.93516	5.8897	5.92056	6.15748
9302	SNORD26	small nucleolar RNA, C/D box 26			9.33326	9.31455	8.90121	8.85821	9.40758	9.37159	9.47496	9.67885
163	AP2B1	adaptor-related protein complex 2, beta 1 subunit	GO:0005515: protein binding, GO:0005829: cytosol, GO:0005886: plasma membrane, GO:0005905: coated pit, GO:0006886: intracellular protein transport, GO:0007173: epidermal growth factor receptor signaling pathway, GO:0007268: synaptic transmission, GO:0007411: axon guidance, GO:0008565: protein transporter activity, GO:0016032: viral reproduction, GO:0016192: vesicle-mediated transport, GO:0030131:…	04144: Endocytosis, 05016: Huntington's disease	10.3264	10.2909	10.1372	10.1516	10.3283	10.3187	10.3109	10.3564
692072	SNORD5	small nucleolar RNA, C/D box 5			9.71053	9.44432	8.07037	7.93985	9.81676	9.80378	9.71363	9.91388
100113384	SNORD123	small nucleolar RNA, C/D box 123			6.34793	6.31439	4.97958	5.23621	6.82513	6.9359	6.86288	7.08692
6083	SNORD21	small nucleolar RNA, C/D box 21			6.91859	6.95093	6.16658	6.1488	7.21436	7.22063	7.26798	7.39976
9299	SNORD30	small nucleolar RNA, C/D box 30			8.77751	8.51657	7.80259	7.92128	9.0526	8.96274	9.10969	9.18421
5915	RARB	retinoic acid receptor, beta	GO:0003677: DNA binding, GO:0003707: steroid hormone receptor activity, GO:0003708: retinoic acid receptor activity, GO:0005634: nucleus, GO:0005654: nucleoplasm, GO:0005737: cytoplasm, GO:0006367: transcription initiation from RNA polymerase II promoter, GO:0007165: signal transduction, GO:0008270: zinc ion binding, GO:0010467: gene expression, GO:0043565: sequence-specific DNA binding, GO:00483…	05200: Pathways in cancer, 05222: Small cell lung cancer, 05223: Non-small cell lung cancer	6.3131	6.22648	5.43685	5.62665	6.49745	6.45613	6.54988	6.52575
8028	MLLT10	myeloid/lymphoid or mixed-lineage leukemia (trithorax homolog, Drosophila); translocated to, 10	GO:0003677: DNA binding, GO:0003700: sequence-specific DNA binding transcription factor activity, GO:0005515: protein binding, GO:0005634: nucleus, GO:0005737: cytoplasm, GO:0006351: transcription, DNA-dependent, GO:0006355: regulation of transcription, DNA-dependent, GO:0008270: zinc ion binding, GO:0045944: positive regulation of transcription from RNA polymerase II promoter		6.57948	6.41779	5.79019	5.96377	6.67996	6.6588	6.67176	6.77408
84759	PCGF1	polycomb group ring finger 1	GO:0005515: protein binding, GO:0005634: nucleus, GO:0006351: transcription, DNA-dependent, GO:0006355: regulation of transcription, DNA-dependent, GO:0008022: protein C-terminus binding, GO:0008270: zinc ion binding, GO:0031519: PcG protein complex, GO:0035518: histone H2A monoubiquitination		7.15245	7.20989	6.70579	6.72796	7.51456	7.46218	7.43959	7.42353
7058	THBS2	thrombospondin 2	GO:0005509: calcium ion binding, GO:0005515: protein binding, GO:0005576: extracellular region, GO:0005604: basement membrane, GO:0007155: cell adhesion, GO:0008201: heparin binding, GO:0016525: negative regulation of angiogenesis, GO:0051965: positive regulation of synapse assembly	04145: Phagosome, 04350: TGF-beta signaling pathway, 04510: Focal adhesion, 04512: ECM-receptor interaction, 05144: Malaria	10.0792	10.0278	9.61885	9.64108	10.3959	10.3832	10.2884	10.2294
3781	KCNN2	potassium intermediate/small conductance calcium-activated channel, subfamily N, member 2	GO:0005516: calmodulin binding, GO:0005886: plasma membrane, GO:0006813: potassium ion transport, GO:0007268: synaptic transmission, GO:0016021: integral to membrane, GO:0016286: small conductance calcium-activated potassium channel activity	04976: Bile secretion	6.10596	6.0987	5.28391	5.42338	6.42284	6.33098	6.30236	6.30064
7067	THRA	thyroid hormone receptor, alpha	GO:0003700: sequence-specific DNA binding transcription factor activity, GO:0003707: steroid hormone receptor activity, GO:0004887: thyroid hormone receptor activity, GO:0005515: protein binding, GO:0005634: nucleus, GO:0005654: nucleoplasm, GO:0005829: cytosol, GO:0006357: regulation of transcription from RNA polymerase II promoter, GO:0006366: transcription from RNA polymerase II promoter, GO:0…	04080: Neuroactive ligand-receptor interaction	6.48072	6.40694	5.97406	6.03916	6.67661	6.6712	6.5615	6.6305
4343	MOV10	Mov10, Moloney leukemia virus 10, homolog (mouse)	GO:0000932: cytoplasmic mRNA processing body, GO:0003723: RNA binding, GO:0004386: helicase activity, GO:0005515: protein binding, GO:0005524: ATP binding, GO:0005829: cytosol, GO:0006351: transcription, DNA-dependent, GO:0006355: regulation of transcription, DNA-dependent, GO:0007219: Notch signaling pathway, GO:0035279: mRNA cleavage involved in gene silencing by miRNA		6.99344	7.03192	6.6521	6.621	7.2537	7.19824	7.29533	7.24815
8609	KLF7	Kruppel-like factor 7 (ubiquitous)	GO:0003677: DNA binding, GO:0003700: sequence-specific DNA binding transcription factor activity, GO:0003713: transcription coactivator activity, GO:0005634: nucleus, GO:0006351: transcription, DNA-dependent, GO:0006357: regulation of transcription from RNA polymerase II promoter, GO:0007411: axon guidance, GO:0008270: zinc ion binding, GO:0045893: positive regulation of transcription, DNA-depend…		9.31824	9.34	8.71551	8.73141	9.69235	9.66242	9.7238	9.67802
619505	SNORA21	small nucleolar RNA, H/ACA box 21			7.08905	7.16576	6.57988	6.6067	7.73957	7.62525	7.75881	7.6231
282679	AQP11	aquaporin 11	GO:0001822: kidney development, GO:0003674: molecular_function, GO:0005215: transporter activity, GO:0005783: endoplasmic reticulum, GO:0005829: cytosol, GO:0005886: plasma membrane, GO:0009986: cell surface, GO:0016021: integral to membrane, GO:0030425: dendrite, GO:0048388: endosomal lumen acidification, GO:0051260: protein homooligomerization		7.86281	7.9385	7.14324	6.94972	8.86562	8.96577	8.79663	8.84506
5031	P2RY6	pyrimidinergic receptor P2Y, G-protein coupled, 6	GO:0004930: G-protein coupled receptor activity, GO:0005886: plasma membrane, GO:0005887: integral to plasma membrane, GO:0007200: phospholipase C-activating G-protein coupled receptor signaling pathway, GO:0045028: G-protein coupled purinergic nucleotide receptor activity	04080: Neuroactive ligand-receptor interaction	5.60739	5.62951	4.84209	4.85948	6.53885	6.48806	6.40635	6.32155
57214	KIAA1199	KIAA1199	GO:0005737: cytoplasm		9.5098	9.39866	8.42077	8.46837	10.3166	10.3398	10.1627	10.1863
144501	KRT80	keratin 80	GO:0005198: structural molecule activity, GO:0045095: keratin filament		5.91564	5.96702	4.85261	4.88015	6.79504	6.89851	6.7151	6.80773
6079	SNORD15A	small nucleolar RNA, C/D box 15A			6.47528	6.39905	5.94008	5.98655	6.84471	6.85704	6.887	6.82334
654320	SNORA8	small nucleolar RNA, H/ACA box 8			4.33297	4.30884	3.94977	3.77803	4.7069	4.672	4.69932	4.70072
677805	SNORA18	small nucleolar RNA, H/ACA box 18			8.22178	8.07312	7.53061	7.46376	8.76269	8.71142	8.57941	8.68216
5236	PGM1	phosphoglucomutase 1	GO:0000287: magnesium ion binding, GO:0004614: phosphoglucomutase activity, GO:0005737: cytoplasm, GO:0005829: cytosol, GO:0005829: cytosol, GO:0005975: carbohydrate metabolic process, GO:0005978: glycogen biosynthetic process, GO:0005978: glycogen biosynthetic process, GO:0005980: glycogen catabolic process, GO:0006006: glucose metabolic process, GO:0006006: glucose metabolic process, GO:0015629…	00010: Glycolysis / Gluconeogenesis, 00030: Pentose phosphate pathway, 00052: Galactose metabolism, 00230: Purine metabolism, 00500: Starch and sucrose metabolism, 00520: Amino sugar and nucleotide sugar metabolism, 01100: Metabolic pathways	7.7267	7.77183	7.47728	7.39156	7.83573	7.82565	7.81578	7.78515
1025	CDK9	cyclin-dependent kinase 9	GO:0003677: DNA binding, GO:0004672: protein kinase activity, GO:0004693: cyclin-dependent protein kinase activity, GO:0005515: protein binding, GO:0005524: ATP binding, GO:0005634: nucleus, GO:0005654: nucleoplasm, GO:0005737: cytoplasm, GO:0006281: DNA repair, GO:0006282: regulation of DNA repair, GO:0006355: regulation of transcription, DNA-dependent, GO:0006366: transcription from RNA polymer…		7.81444	7.83676	7.50828	7.43221	7.956	7.98913	7.9356	7.98428
57222	ERGIC1	endoplasmic reticulum-golgi intermediate compartment (ERGIC) 1	GO:0000139: Golgi membrane, GO:0005515: protein binding, GO:0005789: endoplasmic reticulum membrane, GO:0005793: endoplasmic reticulum-Golgi intermediate compartment, GO:0006888: ER to Golgi vesicle-mediated transport, GO:0016021: integral to membrane, GO:0033116: endoplasmic reticulum-Golgi intermediate compartment membrane		10.4426	10.4227	10.2608	10.1718	10.5144	10.4656	10.5549	10.5264
25987	TSKU	tsukushi small leucine rich proteoglycan homolog (Xenopus laevis)	GO:0005576: extracellular region		8.30413	8.09942	7.81096	7.8342	8.50091	8.36502	8.65695	8.79567
677770	SCARNA22	small Cajal body-specific RNA 22			8.67168	8.55235	8.12263	8.13117	8.89175	8.72622	9.11673	9.12122
26795	SNORD54	small nucleolar RNA, C/D box 54			5.11282	4.72128	3.99047	3.99978	5.617	5.15978	5.86204	5.98474
83638	C11orf68	chromosome 11 open reading frame 68			8.74235	8.53451	8.12976	8.07915	9.03877	8.83458	9.10713	9.11173
51596	CUTA	cutA divalent cation tolerance homolog (E. coli)	GO:0005515: protein binding, GO:0008104: protein localization, GO:0010038: response to metal ion, GO:0016020: membrane, GO:0019899: enzyme binding		7.49263	7.47288	7.22139	7.19592	7.6905	7.5692	7.71477	7.75147
677798	SNORA9	small nucleolar RNA, H/ACA box 9			6.6302	6.4036	5.67782	5.83047	7.13188	7.00357	7.29691	7.52326
100113382	SNORD105B	small nucleolar RNA, C/D box 105B			10.0662	9.83983	9.19633	9.14893	10.5798	10.5186	10.7118	11.045
692213	SNORD110	small nucleolar RNA, C/D box 110			8.99195	8.83664	8.15266	8.08634	9.4942	9.3717	9.71557	9.94433
677809	SNORA24	small nucleolar RNA, H/ACA box 24			8.65367	8.56225	8.31435	8.28235	8.74049	8.82277	8.99816	8.9846
677775	SCARNA5	small Cajal body-specific RNA 5			5.81253	5.47208	4.99849	5.01041	6.38017	6.1326	6.77575	6.74083
619562	SNORA3	small nucleolar RNA, H/ACA box 3			8.0862	7.93392	7.60034	7.58552	8.368	8.32001	8.70949	8.66208
677815	SNORA34	small nucleolar RNA, H/ACA box 34			8.6432	8.62089	8.25614	8.17522	9.02964	8.95486	9.29513	9.37949
677839	SNORA71C	small nucleolar RNA, H/ACA box 71C			8.20827	8.00139	7.71396	7.59579	8.61196	8.55196	8.95938	9.10534
100033427	SNORD116-15	small nucleolar RNA, C/D box 116-15			8.69803	8.43254	7.95289	7.78072	9.19442	9.15766	9.59369	9.66545
26769	SNORD81	small nucleolar RNA, C/D box 81			8.4583	8.21216	7.42827	7.2016	8.93493	8.83908	9.14397	9.26125
100033426	SNORD116-14	small nucleolar RNA, C/D box 116-14			7.05454	6.94887	6.4194	6.03583	7.63815	7.53108	7.81779	8.05898
94161	SNORD46	small nucleolar RNA, C/D box 46			10.0254	9.9311	9.33721	9.16278	10.6922	10.818	10.8592	10.9724
594838	SNORD100	small nucleolar RNA, C/D box 100			8.03937	7.74496	7.14888	6.75475	8.88651	8.76115	9.07538	9.22861
23576	DDAH1	dimethylarginine dimethylaminohydrolase 1	GO:0000052: citrulline metabolic process, GO:0003073: regulation of systemic arterial blood pressure, GO:0003824: catalytic activity, GO:0005739: mitochondrion, GO:0006527: arginine catabolic process, GO:0007263: nitric oxide mediated signal transduction, GO:0016403: dimethylargininase activity, GO:0016597: amino acid binding, GO:0045429: positive regulation of nitric oxide biosynthetic process, …		8.31092	8.2344	8.07852	8.02318	8.47203	8.4726	8.53131	8.52087
134147	CMBL	carboxymethylenebutenolidase homolog (Pseudomonas)	GO:0005829: cytosol, GO:0016787: hydrolase activity	01100: Metabolic pathways	7.49182	7.58392	7.25208	7.31261	7.69344	7.6706	7.79983	7.75219
26808	SNORD42B	small nucleolar RNA, C/D box 42B			7.62235	7.48482	6.6592	6.62223	8.37194	8.41646	8.7177	8.95945
692109	SNORD69	small nucleolar RNA, C/D box 69			8.25209	8.02418	7.08484	7.17263	9.13002	9.13476	9.54204	9.80362
2908	NR3C1	nuclear receptor subfamily 3, group C, member 1 (glucocorticoid receptor)	GO:0003700: sequence-specific DNA binding transcription factor activity, GO:0004883: glucocorticoid receptor activity, GO:0005496: steroid binding, GO:0005515: protein binding, GO:0005634: nucleus, GO:0005654: nucleoplasm, GO:0005737: cytoplasm, GO:0005759: mitochondrial matrix, GO:0006351: transcription, DNA-dependent, GO:0006355: regulation of transcription, DNA-dependent, GO:0006366: transcrip…	04080: Neuroactive ligand-receptor interaction	8.28907	8.25374	7.97391	7.97278	8.5855	8.57984	8.74586	8.72287
65983	GRAMD3	GRAM domain containing 3			7.43703	7.46096	7.06508	7.16047	7.82359	7.84668	7.94731	8.00716
65999	LRRC61	leucine rich repeat containing 61			7.2042	7.03977	6.4409	6.57942	7.66618	7.66498	7.85416	7.81506
10765	KDM5B	lysine (K)-specific demethylase 5B	GO:0003677: DNA binding, GO:0003700: sequence-specific DNA binding transcription factor activity, GO:0003714: transcription corepressor activity, GO:0005515: protein binding, GO:0005634: nucleus, GO:0005730: nucleolus, GO:0006351: transcription, DNA-dependent, GO:0006355: regulation of transcription, DNA-dependent, GO:0008270: zinc ion binding, GO:0016702: oxidoreductase activity, acting on singl…		8.05309	7.93983	7.5457	7.65506	8.29931	8.32579	8.56965	8.49056
83933	HDAC10	histone deacetylase 10	GO:0000118: histone deacetylase complex, GO:0000122: negative regulation of transcription from RNA polymerase II promoter, GO:0004407: histone deacetylase activity, GO:0005515: protein binding, GO:0005634: nucleus, GO:0005654: nucleoplasm, GO:0005737: cytoplasm, GO:0006351: transcription, DNA-dependent, GO:0006355: regulation of transcription, DNA-dependent, GO:0006476: protein deacetylation, GO:…		5.64417	5.6123	5.35095	5.41526	5.7702	5.6597	5.88473	5.83391
2069	EREG	epiregulin	GO:0001525: angiogenesis, GO:0001550: ovarian cumulus expansion, GO:0001556: oocyte maturation, GO:0001819: positive regulation of cytokine production, GO:0005154: epidermal growth factor receptor binding, GO:0005154: epidermal growth factor receptor binding, GO:0005515: protein binding, GO:0005576: extracellular region, GO:0005615: extracellular space, GO:0005887: integral to plasma membrane, GO…	04012: ErbB signaling pathway	1.84347	1.85005	1.48673	1.51296	1.94799	1.86964	2.14006	2.1606
23331	TTC28	tetratricopeptide repeat domain 28			5.92889	5.85042	5.66693	5.62498	5.94912	5.97473	6.16358	6.03356
347735	SERINC2	serine incorporator 2	GO:0016021: integral to membrane		7.77776	7.82153	7.63829	7.57921	7.86918	7.9474	7.98556	8.01713
22858	ICK	intestinal cell (MAK-like) kinase	GO:0000287: magnesium ion binding, GO:0004674: protein serine/threonine kinase activity, GO:0004693: cyclin-dependent protein kinase activity, GO:0005524: ATP binding, GO:0005634: nucleus, GO:0005829: cytosol, GO:0006468: protein phosphorylation, GO:0007165: signal transduction, GO:0007243: intracellular protein kinase cascade, GO:0007275: multicellular organismal development, GO:0043231: intrace…		7.57563	7.63472	7.36373	7.3018	7.57152	7.67565	7.7393	7.80208
8189	SYMPK	symplekin	GO:0005515: protein binding, GO:0005634: nucleus, GO:0005654: nucleoplasm, GO:0005737: cytoplasm, GO:0005856: cytoskeleton, GO:0005886: plasma membrane, GO:0005923: tight junction, GO:0006397: mRNA processing, GO:0007155: cell adhesion, GO:0008150: biological_process	03015: mRNA surveillance pathway, 04530: Tight junction	7.68178	7.67887	7.5152	7.45692	7.64465	7.73895	7.81537	7.83027
26801	SNORD48	small nucleolar RNA, C/D box 48			8.00151	7.73285	7.27622	7.09331	8.12631	8.09581	8.53961	8.79263
619570	SNORD95	small nucleolar RNA, C/D box 95			10.5671	10.385	9.92861	9.84476	10.8196	10.7768	10.9605	11.1803
26816	SNORD35A	small nucleolar RNA, C/D box 35A			7.64981	7.44868	6.71912	6.65304	7.95084	7.86842	8.21078	8.53482
692205	SNORD89	small nucleolar RNA, C/D box 89			11.2966	11.16	10.8724	10.814	11.3452	11.3573	11.4532	11.6406
26813	SNORD36C	small nucleolar RNA, C/D box 36C			6.31446	6.3579	5.19354	4.80902	6.9568	6.79314	7.24909	7.72322
26789	SNORD59A	small nucleolar RNA, C/D box 59A			8.02563	7.92509	7.06272	6.69393	8.23943	8.2081	8.60467	8.9025
9301	SNORD27	small nucleolar RNA, C/D box 27			9.77949	9.69794	9.11873	9.15192	9.88581	9.99745	10.2839	10.6341
26820	SNORD24	small nucleolar RNA, C/D box 24			9.3837	9.30876	8.8736	8.87626	9.61497	9.65141	9.93285	10.2239
677850	SNORD1C	small nucleolar RNA, C/D box 1C			9.80422	9.86346	9.31682	9.26497	10.0905	10.1078	10.3117	10.5301
26806	SNORD44	small nucleolar RNA, C/D box 44			9.15201	9.06662	8.51934	8.50426	9.45603	9.46036	9.6887	9.99453
26810	SNORD41	small nucleolar RNA, C/D box 41			9.69037	9.65152	9.17097	9.17035	9.87653	9.91401	10.0936	10.3641
22955	SCMH1	sex comb on midleg homolog 1 (Drosophila)	GO:0003677: DNA binding, GO:0003700: sequence-specific DNA binding transcription factor activity, GO:0005634: nucleus, GO:0006351: transcription, DNA-dependent, GO:0006355: regulation of transcription, DNA-dependent, GO:0007275: multicellular organismal development, GO:0009653: anatomical structure morphogenesis, GO:0016458: gene silencing, GO:0045892: negative regulation of transcription, DNA-de…		7.93579	7.9193	7.69342	7.70822	8.34098	8.33141	8.36646	8.35447
5740	PTGIS	prostaglandin I2 (prostacyclin) synthase	GO:0001516: prostaglandin biosynthetic process, GO:0004497: monooxygenase activity, GO:0005515: protein binding, GO:0005615: extracellular space, GO:0005634: nucleus, GO:0005783: endoplasmic reticulum, GO:0005788: endoplasmic reticulum lumen, GO:0005789: endoplasmic reticulum membrane, GO:0005901: caveola, GO:0006690: icosanoid metabolic process, GO:0006692: prostanoid metabolic process, GO:00068…	00590: Arachidonic acid metabolism, 01100: Metabolic pathways	7.60979	7.62311	7.13757	7.11103	8.58351	8.67667	8.64997	8.61418
55691	FRMD4A	FERM domain containing 4A	GO:0005737: cytoplasm, GO:0005856: cytoskeleton, GO:0005923: tight junction, GO:0030674: protein binding, bridging, GO:0090162: establishment of epithelial cell polarity		7.3068	7.29761	6.97546	6.9045	8.02702	8.07368	8.06013	8.11012
23641	LDOC1	leucine zipper, down-regulated in cancer 1	GO:0005515: protein binding, GO:0005634: nucleus, GO:0008285: negative regulation of cell proliferation		7.57573	7.48025	7.12715	7.17345	8.10402	8.02625	8.06421	8.10526
10253	SPRY2	sprouty homolog 2 (Drosophila)	GO:0005515: protein binding, GO:0005829: cytosol, GO:0005874: microtubule, GO:0005886: plasma membrane, GO:0007173: epidermal growth factor receptor signaling pathway, GO:0007605: sensory perception of sound, GO:0008285: negative regulation of cell proliferation, GO:0008543: fibroblast growth factor receptor signaling pathway, GO:0010628: positive regulation of gene expression, GO:0010801: negati…	04630: Jak-STAT signaling pathway	7.03017	7.05994	6.85049	6.74062	7.46846	7.39533	7.50652	7.5014
652965	SNORA48	small nucleolar RNA, H/ACA box 48			10.8522	10.8255	10.675	10.6743	11.2549	11.3021	11.3762	11.5004
26793	SNORD56	small nucleolar RNA, C/D box 56			7.12746	6.91116	6.59292	6.54349	7.85347	7.72465	8.05239	8.1617
114599	SNORD15B	small nucleolar RNA, C/D box 15B			9.61915	9.42841	9.1396	9.13108	10.3667	10.2749	10.4208	10.4831
9249	DHRS3	dehydrogenase/reductase (SDR family) member 3	GO:0000166: nucleotide binding, GO:0007601: visual perception, GO:0009055: electron carrier activity, GO:0016021: integral to membrane, GO:0042572: retinol metabolic process, GO:0052650: NADP-retinol dehydrogenase activity	00830: Retinol metabolism, 01100: Metabolic pathways	8.29639	8.35225	7.94949	8.0223	8.92998	8.87089	9.22194	9.23543
84836	ABHD14B	abhydrolase domain containing 14B	GO:0005634: nucleus, GO:0005730: nucleolus, GO:0005737: cytoplasm, GO:0016787: hydrolase activity		6.04443	6.07986	5.8559	5.93929	6.42685	6.37613	6.55746	6.52844
692148	SCARNA10	small Cajal body-specific RNA 10			6.18164	6.2658	5.9792	6.00556	6.65769	6.59854	6.87339	6.73951
677828	SNORA47	small nucleolar RNA, H/ACA box 47			6.54985	6.48685	6.26764	6.21888	7.30229	7.38156	7.90513	7.64176
677830	SNORA50	small nucleolar RNA, H/ACA box 50			6.62296	6.76789	6.42268	6.38901	7.19473	7.23853	7.66995	7.63723
677840	SNORA71D	small nucleolar RNA, H/ACA box 71D			7.58654	7.74195	7.40501	7.45879	8.21124	8.15912	8.56601	8.57376
3672	ITGA1	integrin, alpha 1	GO:0000187: activation of MAPK activity, GO:0001669: acrosomal vesicle, GO:0005178: integrin binding, GO:0005515: protein binding, GO:0005518: collagen binding, GO:0005886: plasma membrane, GO:0006936: muscle contraction, GO:0007160: cell-matrix adhesion, GO:0007229: integrin-mediated signaling pathway, GO:0007411: axon guidance, GO:0008305: integrin complex, GO:0009897: external side of plasma m…	04510: Focal adhesion, 04512: ECM-receptor interaction, 04640: Hematopoietic cell lineage, 04810: Regulation of actin cytoskeleton, 05410: Hypertrophic cardiomyopathy (HCM), 05412: Arrhythmogenic right ventricular cardiomyopathy (ARVC), 05414: Dilated cardiomyopathy	6.97649	6.94938	7.0129	7.06336	7.61597	7.59394	7.86731	7.83106
2556	GABRA3	gamma-aminobutyric acid (GABA) A receptor, alpha 3	GO:0004890: GABA-A receptor activity, GO:0005230: extracellular ligand-gated ion channel activity, GO:0005254: chloride channel activity, GO:0005886: plasma membrane, GO:0005887: integral to plasma membrane, GO:0006810: transport, GO:0007214: gamma-aminobutyric acid signaling pathway, GO:0007268: synaptic transmission, GO:0008503: benzodiazepine receptor activity, GO:0030054: cell junction, GO:00…	04080: Neuroactive ligand-receptor interaction	7.98322	7.94932	7.89902	7.89121	8.49181	8.50355	8.57153	8.61191
7041	TGFB1I1	transforming growth factor beta 1 induced transcript 1	GO:0003713: transcription coactivator activity, GO:0003713: transcription coactivator activity, GO:0005515: protein binding, GO:0005622: intracellular, GO:0005737: cytoplasm, GO:0005856: cytoskeleton, GO:0005925: focal adhesion, GO:0006366: transcription from RNA polymerase II promoter, GO:0007155: cell adhesion, GO:0008270: zinc ion binding, GO:0008285: negative regulation of cell proliferation,…		8.35137	8.2982	8.24065	8.23769	9.09503	9.10796	9.15412	9.14213
4017	LOXL2	lysyl oxidase-like 2	GO:0001666: response to hypoxia, GO:0001837: epithelial to mesenchymal transition, GO:0001935: endothelial cell proliferation, GO:0002040: sprouting angiogenesis, GO:0003682: chromatin binding, GO:0003714: transcription corepressor activity, GO:0004720: protein-lysine 6-oxidase activity, GO:0005044: scavenger receptor activity, GO:0005507: copper ion binding, GO:0005515: protein binding, GO:00056…		9.9369	9.86248	9.8361	9.78785	10.4015	10.4275	10.6392	10.6158
79726	WDR59	WD repeat domain 59	GO:0003674: molecular_function, GO:0005575: cellular_component, GO:0008150: biological_process		6.5336	6.52769	6.46356	6.42786	6.90734	6.91784	7.05626	7.09933
54972	TMEM132A	transmembrane protein 132A	GO:0000139: Golgi membrane, GO:0003674: molecular_function, GO:0005575: cellular_component, GO:0005789: endoplasmic reticulum membrane, GO:0008150: biological_process, GO:0016021: integral to membrane		8.32964	8.26626	8.26226	8.28493	8.85021	8.83984	9.04248	9.08828
677808	SNORA23	small nucleolar RNA, H/ACA box 23			8.55384	8.46576	8.05085	8.12362	9.1499	9.1565	9.50207	9.69362
692073	SNORA16A	small nucleolar RNA, H/ACA box 16A			10.0295	10.0285	9.81393	9.79161	10.3956	10.3397	10.5484	10.6703
677800	SNORA12	small nucleolar RNA, H/ACA box 12			6.59453	6.43759	6.14498	6.15613	7.22084	7.04692	7.61347	7.89676
619565	SNORA52	small nucleolar RNA, H/ACA box 52			6.92899	6.85446	6.45274	6.69449	7.40551	7.37087	7.6908	7.81451
100124534	SNORA84	small nucleolar RNA, H/ACA box 84			6.62288	6.51353	6.18215	6.3567	6.88473	6.84598	7.26347	7.46006
692111	SNORD71	small nucleolar RNA, C/D box 71			7.40543	7.10425	6.7725	6.57286	7.77337	7.8437	8.38249	8.83558
692110	SNORD70	small nucleolar RNA, C/D box 70			3.5229	3.39857	3.07493	3.12283	3.77547	4.20861	4.71245	4.86761
80336	PABPC1L	poly(A) binding protein, cytoplasmic 1-like	GO:0000166: nucleotide binding, GO:0003723: RNA binding	03013: RNA transport, 03015: mRNA surveillance pathway, 03018: RNA degradation	4.75395	4.73956	4.61157	4.57274	4.79188	4.90068	5.2364	5.18059
55689	YEATS2	YEATS domain containing 2	GO:0000122: negative regulation of transcription from RNA polymerase II promoter, GO:0005515: protein binding, GO:0005671: Ada2/Gcn5/Ada3 transcription activator complex, GO:0017025: TBP-class protein binding, GO:0043966: histone H3 acetylation, GO:0045892: negative regulation of transcription, DNA-dependent		6.81914	6.66331	6.52055	6.49434	7.00588	6.92375	7.34329	7.27103
5595	MAPK3	mitogen-activated protein kinase 3	GO:0000165: MAPK cascade, GO:0000165: MAPK cascade, GO:0000165: MAPK cascade, GO:0000186: activation of MAPKK activity, GO:0000187: activation of MAPK activity, GO:0001784: phosphotyrosine binding, GO:0002224: toll-like receptor signaling pathway, GO:0002755: MyD88-dependent toll-like receptor signaling pathway, GO:0002756: MyD88-independent toll-like receptor signaling pathway, GO:0004707: MAP k…	04010: MAPK signaling pathway, 04012: ErbB signaling pathway, 04062: Chemokine signaling pathway, 04114: Oocyte meiosis, 04150: mTOR signaling pathway, 04270: Vascular smooth muscle contraction, 04320: Dorso-ventral axis formation, 04350: TGF-beta signaling pathway, 04360: Axon guidance, 04370: VEGF signaling pathway, 04380: Osteoclast differentiation, 04510: Focal adhesion, 04520: Adherens junct…	7.48335	7.45022	7.35602	7.28298	7.54944	7.50199	7.71049	7.71752
26781	SNORA67	small nucleolar RNA, H/ACA box 67			8.06813	8.04901	7.78994	7.71634	8.37583	8.26745	8.66075	8.74483
1435	CSF1	colony stimulating factor 1 (macrophage)	GO:0001503: ossification, GO:0001954: positive regulation of cell-matrix adhesion, GO:0003006: developmental process involved in reproduction, GO:0005125: cytokine activity, GO:0005157: macrophage colony-stimulating factor receptor binding, GO:0005157: macrophage colony-stimulating factor receptor binding, GO:0005615: extracellular space, GO:0005886: plasma membrane, GO:0006954: inflammatory resp…	04060: Cytokine-cytokine receptor interaction, 04380: Osteoclast differentiation, 04640: Hematopoietic cell lineage, 05323: Rheumatoid arthritis	6.76367	6.7674	6.44611	6.53567	6.84499	6.92749	7.21422	7.28513
1944	EFNA3	ephrin-A3	GO:0005005: transmembrane-ephrin receptor activity, GO:0005887: integral to plasma membrane, GO:0007267: cell-cell signaling, GO:0031225: anchored to membrane, GO:0046875: ephrin receptor binding, GO:0048013: ephrin receptor signaling pathway	04360: Axon guidance	4.3536	4.43277	3.55341	3.93958	4.7356	4.72124	5.39311	5.34086
100996339	LOC100996339	uncharacterized LOC100996339			3.32715	3.35209	3.14237	3.28822	3.41286	3.38507	3.64384	3.6704
6302	TSPAN31	tetraspanin 31	GO:0005887: integral to plasma membrane, GO:0008284: positive regulation of cell proliferation		7.81732	7.81122	7.59304	7.71844	8.05217	7.84894	8.41022	8.41816
54455	FBXO42	F-box protein 42			6.52545	6.60373	6.34804	6.35228	6.63601	6.5731	7.03201	7.13879
253260	RICTOR	RPTOR independent companion of MTOR, complex 2	GO:0005515: protein binding, GO:0005829: cytosol, GO:0007173: epidermal growth factor receptor signaling pathway, GO:0008543: fibroblast growth factor receptor signaling pathway, GO:0009790: embryo development, GO:0030838: positive regulation of actin filament polymerization, GO:0031295: T cell costimulation, GO:0031532: actin cytoskeleton reorganization, GO:0031932: TORC2 complex, GO:0032008: po…	04150: mTOR signaling pathway	7.97915	8.00324	7.9143	7.87263	8.02446	8.02785	8.15785	8.17828
6574	SLC20A1	solute carrier family 20 (phosphate transporter), member 1	GO:0004871: signal transducer activity, GO:0004872: receptor activity, GO:0005315: inorganic phosphate transmembrane transporter activity, GO:0005316: high affinity inorganic phosphate:sodium symporter activity, GO:0005436: sodium:phosphate symporter activity, GO:0005886: plasma membrane, GO:0005887: integral to plasma membrane, GO:0006796: phosphate-containing compound metabolic process, GO:0006…		8.58038	8.67545	8.73243	8.82863	8.59845	8.58658	9.06291	9.12261
8027	STAM	signal transducing adaptor molecule (SH3 domain and ITAM motif) 1	GO:0005070: SH3/SH2 adaptor activity, GO:0005515: protein binding, GO:0005829: cytosol, GO:0006886: intracellular protein transport, GO:0007165: signal transduction, GO:0007173: epidermal growth factor receptor signaling pathway, GO:0016044: cellular membrane organization, GO:0016197: endosomal transport, GO:0031901: early endosome membrane, GO:0042059: negative regulation of epidermal growth fac…	04144: Endocytosis, 04630: Jak-STAT signaling pathway	8.68612	8.70471	8.84309	8.76509	8.65527	8.68569	9.04637	9.115
3099	HK2	hexokinase 2	GO:0004396: hexokinase activity, GO:0005524: ATP binding, GO:0005536: glucose binding, GO:0005741: mitochondrial outer membrane, GO:0005829: cytosol, GO:0005975: carbohydrate metabolic process, GO:0006096: glycolysis, GO:0007595: lactation, GO:0008637: apoptotic mitochondrial changes, GO:0008645: hexose transport, GO:0015758: glucose transport, GO:0044281: small molecule metabolic process, GO:004…	00010: Glycolysis / Gluconeogenesis, 00051: Fructose and mannose metabolism, 00052: Galactose metabolism, 00500: Starch and sucrose metabolism, 00520: Amino sugar and nucleotide sugar metabolism, 00524: Butirosin and neomycin biosynthesis, 01100: Metabolic pathways, 04910: Insulin signaling pathway, 04930: Type II diabetes mellitus, 04973: Carbohydrate digestion and absorption	6.64588	6.50788	6.79278	6.83283	6.38299	6.40396	7.60703	7.69937
148479	PHF13	PHD finger protein 13	GO:0000278: mitotic cell cycle, GO:0003682: chromatin binding, GO:0005634: nucleus, GO:0005654: nucleoplasm, GO:0007059: chromosome segregation, GO:0007076: mitotic chromosome condensation, GO:0008270: zinc ion binding, GO:0016568: chromatin modification, GO:0035064: methylated histone residue binding, GO:0051301: cell division		6.14917	6.20228	6.24481	6.27108	5.9626	5.91207	6.64709	6.82243
30001	ERO1L	ERO1-like (S. cerevisiae)	GO:0005783: endoplasmic reticulum, GO:0005788: endoplasmic reticulum lumen, GO:0005789: endoplasmic reticulum membrane, GO:0006457: protein folding, GO:0006464: cellular protein modification process, GO:0006467: protein thiol-disulfide exchange, GO:0009266: response to temperature stimulus, GO:0016491: oxidoreductase activity, GO:0016671: oxidoreductase activity, acting on a sulfur group of donor…	04141: Protein processing in endoplasmic reticulum, 05110: Vibrio cholerae infection	8.94652	8.88407	9.12338	9.07496	8.69149	8.67237	9.50957	9.61869
7189	TRAF6	TNF receptor-associated factor 6, E3 ubiquitin protein ligase	GO:0000122: negative regulation of transcription from RNA polymerase II promoter, GO:0000187: activation of MAPK activity, GO:0000209: protein polyubiquitination, GO:0001503: ossification, GO:0002224: toll-like receptor signaling pathway, GO:0002726: positive regulation of T cell cytokine production, GO:0002755: MyD88-dependent toll-like receptor signaling pathway, GO:0002756: MyD88-independent t…	04010: MAPK signaling pathway, 04120: Ubiquitin mediated proteolysis, 04144: Endocytosis, 04380: Osteoclast differentiation, 04620: Toll-like receptor signaling pathway, 04621: NOD-like receptor signaling pathway, 04622: RIG-I-like receptor signaling pathway, 04722: Neurotrophin signaling pathway, 05140: Leishmaniasis, 05142: Chagas disease (American trypanosomiasis), 05145: Toxoplasmosis, 05160:…	6.92303	7.01164	7.08267	6.9994	6.87404	6.843	7.29315	7.33503
6018	RLF	rearranged L-myc fusion	GO:0003677: DNA binding, GO:0005515: protein binding, GO:0005634: nucleus, GO:0006351: transcription, DNA-dependent, GO:0006355: regulation of transcription, DNA-dependent, GO:0008270: zinc ion binding, GO:0009294: DNA mediated transformation, GO:0015074: DNA integration, GO:0045893: positive regulation of transcription, DNA-dependent, GO:0045944: positive regulation of transcription from RNA pol…		7.2202	7.28271	7.86026	7.96906	7.0956	7.07777	8.45764	8.56541
1316	KLF6	Kruppel-like factor 6	GO:0003690: double-stranded DNA binding, GO:0003700: sequence-specific DNA binding transcription factor activity, GO:0005634: nucleus, GO:0005737: cytoplasm, GO:0006351: transcription, DNA-dependent, GO:0006355: regulation of transcription, DNA-dependent, GO:0008270: zinc ion binding, GO:0019221: cytokine-mediated signaling pathway, GO:0030183: B cell differentiation, GO:0042060: wound healing, G…		9.42983	9.41295	9.6183	9.73453	9.24023	9.20684	10.0658	10.0026
664	BNIP3	BCL2/adenovirus E1B 19kDa interacting protein 3	GO:0001666: response to hypoxia, GO:0005515: protein binding, GO:0005634: nucleus, GO:0005634: nucleus, GO:0005635: nuclear envelope, GO:0005654: nucleoplasm, GO:0005737: cytoplasm, GO:0005739: mitochondrion, GO:0005739: mitochondrion, GO:0005741: mitochondrial outer membrane, GO:0006309: apoptotic DNA fragmentation, GO:0006338: chromatin remodeling, GO:0006915: apoptotic process, GO:0006915: apo…		8.81241	8.76114	9.2414	9.37319	8.51075	8.63003	10.1143	9.9533
55279	ZNF654	zinc finger protein 654	GO:0003677: DNA binding, GO:0005634: nucleus, GO:0006351: transcription, DNA-dependent, GO:0006355: regulation of transcription, DNA-dependent, GO:0008270: zinc ion binding		6.52268	6.54552	7.21515	6.99643	6.47298	6.44198	7.77568	7.7174
5209	PFKFB3	6-phosphofructo-2-kinase/fructose-2,6-biphosphatase 3	GO:0003873: 6-phosphofructo-2-kinase activity, GO:0004331: fructose-2,6-bisphosphate 2-phosphatase activity, GO:0005524: ATP binding, GO:0005829: cytosol, GO:0005975: carbohydrate metabolic process, GO:0006000: fructose metabolic process, GO:0006003: fructose 2,6-bisphosphate metabolic process, GO:0006006: glucose metabolic process, GO:0006096: glycolysis, GO:0044281: small molecule metabolic pro…	00051: Fructose and mannose metabolism	6.0088	5.78316	7.31198	7.22894	6.12964	5.78825	8.50845	8.51044
6513	SLC2A1	solute carrier family 2 (facilitated glucose transporter), member 1	GO:0001939: female pronucleus, GO:0005355: glucose transmembrane transporter activity, GO:0005886: plasma membrane, GO:0005901: caveola, GO:0005911: cell-cell junction, GO:0005975: carbohydrate metabolic process, GO:0006112: energy reserve metabolic process, GO:0006766: vitamin metabolic process, GO:0006767: water-soluble vitamin metabolic process, GO:0006970: response to osmotic stress, GO:00086…	04920: Adipocytokine signaling pathway, 04976: Bile secretion, 05200: Pathways in cancer, 05211: Renal cell carcinoma	7.87198	7.92703	8.61394	8.65064	7.96988	7.87867	9.25459	9.36544
53349	ZFYVE1	zinc finger, FYVE domain containing 1	GO:0005515: protein binding, GO:0005545: 1-phosphatidylinositol binding, GO:0005547: phosphatidylinositol-3,4,5-trisphosphate binding, GO:0005783: endoplasmic reticulum, GO:0005795: Golgi stack, GO:0008270: zinc ion binding, GO:0010923: negative regulation of phosphatase activity, GO:0043325: phosphatidylinositol-3,4-bisphosphate binding, GO:0048471: perinuclear region of cytoplasm		6.31865	6.20832	6.6933	6.64696	6.26191	6.32913	7.15781	7.05781
90338	ZNF160	zinc finger protein 160	GO:0003677: DNA binding, GO:0005634: nucleus, GO:0006351: transcription, DNA-dependent, GO:0006355: regulation of transcription, DNA-dependent, GO:0008270: zinc ion binding, GO:0030097: hemopoiesis		5.19304	5.22358	6.06274	5.95416	5.33452	5.33856	6.49302	6.54022
27244	SESN1	sestrin 1	GO:0005634: nucleus, GO:0006974: response to DNA damage stimulus, GO:0007050: cell cycle arrest, GO:0008285: negative regulation of cell proliferation	04115: p53 signaling pathway	5.62815	5.70705	6.98461	6.95871	5.81253	5.74352	7.63544	7.75243
7050	TGIF1	TGFB-induced factor homeobox 1	GO:0000122: negative regulation of transcription from RNA polymerase II promoter, GO:0001843: neural tube closure, GO:0003682: chromatin binding, GO:0003700: sequence-specific DNA binding transcription factor activity, GO:0003714: transcription corepressor activity, GO:0005634: nucleus, GO:0006351: transcription, DNA-dependent, GO:0007275: multicellular organismal development, GO:0007368: determi…		5.23549	5.25588	5.98893	5.93949	5.38078	5.35857	6.34433	6.29417
25841	ABTB2	ankyrin repeat and BTB (POZ) domain containing 2	GO:0001558: regulation of cell growth, GO:0003674: molecular_function, GO:0003677: DNA binding, GO:0005575: cellular_component		7.02535	7.08683	8.00083	7.98317	7.27811	7.21871	8.70126	8.70206
3339	HSPG2	heparan sulfate proteoglycan 2	GO:0001525: angiogenesis, GO:0001958: endochondral ossification, GO:0002062: chondrocyte differentiation, GO:0005515: protein binding, GO:0005576: extracellular region, GO:0005605: basal lamina, GO:0005615: extracellular space, GO:0005886: plasma membrane, GO:0006629: lipid metabolic process, GO:0007420: brain development, GO:0008022: protein C-terminus binding, GO:0008104: protein localization, …	04512: ECM-receptor interaction	6.5887	6.47446	6.58704	6.51941	6.48336	6.39889	7.0954	7.01213
5210	PFKFB4	6-phosphofructo-2-kinase/fructose-2,6-biphosphatase 4	GO:0003873: 6-phosphofructo-2-kinase activity, GO:0004331: fructose-2,6-bisphosphate 2-phosphatase activity, GO:0005524: ATP binding, GO:0005829: cytosol, GO:0005975: carbohydrate metabolic process, GO:0006000: fructose metabolic process, GO:0006003: fructose 2,6-bisphosphate metabolic process, GO:0006006: glucose metabolic process, GO:0006096: glycolysis, GO:0042802: identical protein binding, G…	00051: Fructose and mannose metabolism	5.45817	5.42037	5.25258	5.54312	5.38624	5.11751	7.03624	6.94462
5598	MAPK7	mitogen-activated protein kinase 7	GO:0002224: toll-like receptor signaling pathway, GO:0002755: MyD88-dependent toll-like receptor signaling pathway, GO:0002756: MyD88-independent toll-like receptor signaling pathway, GO:0004707: MAP kinase activity, GO:0005515: protein binding, GO:0005524: ATP binding, GO:0005634: nucleus, GO:0005654: nucleoplasm, GO:0005829: cytosol, GO:0006915: apoptotic process, GO:0007049: cell cycle, GO:000…	04010: MAPK signaling pathway, 04540: Gap junction, 04722: Neurotrophin signaling pathway, 04912: GnRH signaling pathway	6.16362	6.18745	6.18153	6.05695	6.16294	5.95605	6.68321	6.64537
652995	UCA1	urothelial cancer associated 1 (non-protein coding)			7.18427	7.2862	7.44875	7.43835	7.23168	6.96507	8.04148	8.09395
9123	SLC16A3	solute carrier family 16, member 3 (monocarboxylic acid transporter 4)	GO:0005886: plasma membrane, GO:0005886: plasma membrane, GO:0005887: integral to plasma membrane, GO:0006090: pyruvate metabolic process, GO:0007596: blood coagulation, GO:0008028: monocarboxylic acid transmembrane transporter activity, GO:0015293: symporter activity, GO:0015355: secondary active monocarboxylate transmembrane transporter activity, GO:0015629: actin cytoskeleton, GO:0015711: orga…		9.67064	9.63395	9.6768	9.70572	9.64846	9.52845	10.0013	9.99498
54583	EGLN1	egl nine homolog 1 (C. elegans)	GO:0001666: response to hypoxia, GO:0005506: iron ion binding, GO:0005515: protein binding, GO:0005634: nucleus, GO:0005737: cytoplasm, GO:0005829: cytosol, GO:0008270: zinc ion binding, GO:0016702: oxidoreductase activity, acting on single donors with incorporation of molecular oxygen, incorporation of two atoms of oxygen, GO:0031418: L-ascorbic acid binding, GO:0031543: peptidyl-proline dioxyge…	05200: Pathways in cancer, 05211: Renal cell carcinoma	7.88802	7.97613	8.11434	8.03141	8.01699	8.01147	8.56506	8.63406
23036	ZNF292	zinc finger protein 292	GO:0003677: DNA binding, GO:0005634: nucleus, GO:0006351: transcription, DNA-dependent, GO:0008270: zinc ion binding, GO:0045944: positive regulation of transcription from RNA polymerase II promoter		6.11911	6.33222	6.68407	6.66006	6.29805	6.41914	7.69046	7.69199
10397	NDRG1	N-myc downstream regulated 1	GO:0005515: protein binding, GO:0005634: nucleus, GO:0005737: cytoplasm, GO:0005813: centrosome, GO:0005829: cytosol, GO:0005874: microtubule, GO:0005886: plasma membrane, GO:0005913: cell-cell adherens junction, GO:0008017: microtubule binding, GO:0010038: response to metal ion, GO:0015630: microtubule cytoskeleton, GO:0017137: Rab GTPase binding, GO:0030330: DNA damage response, signal transduc…		8.49147	8.46612	9.64858	9.56863	8.81378	8.89543	10.8287	10.9729
55818	KDM3A	lysine (K)-specific demethylase 3A	GO:0005506: iron ion binding, GO:0005634: nucleus, GO:0005737: cytoplasm, GO:0006351: transcription, DNA-dependent, GO:0007283: spermatogenesis, GO:0009755: hormone-mediated signaling pathway, GO:0016702: oxidoreductase activity, acting on single donors with incorporation of molecular oxygen, incorporation of two atoms of oxygen, GO:0030154: cell differentiation, GO:0030521: androgen receptor sig…		6.78924	6.70944	7.43137	7.40348	7.0045	6.97489	8.57686	8.57485
8816	DCAF5	DDB1 and CUL4 associated factor 5	GO:0005739: mitochondrion, GO:0016567: protein ubiquitination, GO:0016567: protein ubiquitination, GO:0080008: Cul4-RING ubiquitin ligase complex		7.62501	7.58669	7.91907	7.9122	7.78588	7.82203	8.33574	8.36401
652	BMP4	bone morphogenetic protein 4	GO:0000122: negative regulation of transcription from RNA polymerase II promoter, GO:0000186: activation of MAPKK activity, GO:0001649: osteoblast differentiation, GO:0001657: ureteric bud development, GO:0001658: branching involved in ureteric bud morphogenesis, GO:0001822: kidney development, GO:0001823: mesonephros development, GO:0001934: positive regulation of protein phosphorylation, GO:000…	04340: Hedgehog signaling pathway, 04350: TGF-beta signaling pathway, 05200: Pathways in cancer, 05217: Basal cell carcinoma	6.93553	6.91647	7.87066	7.73198	7.58166	7.46391	9.11151	9.0887
10043	TOM1	target of myb1 (chicken)	GO:0005515: protein binding, GO:0005769: early endosome, GO:0005829: cytosol, GO:0006886: intracellular protein transport, GO:0006897: endocytosis, GO:0015031: protein transport, GO:0016020: membrane, GO:0016197: endosomal transport, GO:0016197: endosomal transport		5.89851	5.95143	6.21769	6.26051	6.17239	6.16959	6.74335	6.70154
5507	PPP1R3C	protein phosphatase 1, regulatory subunit 3C	GO:0004722: protein serine/threonine phosphatase activity, GO:0005515: protein binding, GO:0005978: glycogen biosynthetic process, GO:0005979: regulation of glycogen biosynthetic process, GO:0005981: regulation of glycogen catabolic process, GO:0019899: enzyme binding, GO:0042587: glycogen granule	04910: Insulin signaling pathway	6.0484	5.98641	6.3004	6.39041	6.1863	6.09815	7.34774	7.33456
54934	KANSL2	KAT8 regulatory NSL complex subunit 2	GO:0000123: histone acetyltransferase complex, GO:0043981: histone H4-K5 acetylation, GO:0043982: histone H4-K8 acetylation, GO:0043984: histone H4-K16 acetylation, GO:0043995: histone acetyltransferase activity (H4-K5 specific), GO:0043996: histone acetyltransferase activity (H4-K8 specific), GO:0046972: histone acetyltransferase activity (H4-K16 specific)		6.76059	6.68131	6.78183	6.78916	6.79979	6.77231	7.09718	7.0844
23002	DAAM1	dishevelled associated activator of morphogenesis 1	GO:0001725: stress fiber, GO:0003779: actin binding, GO:0005737: cytoplasm, GO:0005886: plasma membrane, GO:0017048: Rho GTPase binding, GO:0030036: actin cytoskeleton organization	04310: Wnt signaling pathway	5.81902	5.85863	6.1464	6.11855	6.19712	6.12846	7.02483	6.93065
3993	LLGL2	lethal giant larvae homolog 2 (Drosophila)	GO:0005515: protein binding, GO:0005737: cytoplasm, GO:0006887: exocytosis, GO:0007049: cell cycle, GO:0030165: PDZ domain binding, GO:0032878: regulation of establishment or maintenance of cell polarity, GO:0043231: intracellular membrane-bounded organelle, GO:0051301: cell division	04530: Tight junction	3.88954	3.89546	4.11863	4.15436	4.12188	4.01908	4.64879	4.64923
4193	MDM2	Mdm2, p53 E3 ubiquitin protein ligase homolog (mouse)	GO:0000075: cell cycle checkpoint, GO:0000122: negative regulation of transcription from RNA polymerase II promoter, GO:0002039: p53 binding, GO:0004842: ubiquitin-protein ligase activity, GO:0004842: ubiquitin-protein ligase activity, GO:0005515: protein binding, GO:0005634: nucleus, GO:0005634: nucleus, GO:0005654: nucleoplasm, GO:0005654: nucleoplasm, GO:0005730: nucleolus, GO:0005737: cytopla…	04110: Cell cycle, 04115: p53 signaling pathway, 04120: Ubiquitin mediated proteolysis, 04144: Endocytosis, 05200: Pathways in cancer, 05214: Glioma, 05215: Prostate cancer, 05218: Melanoma, 05219: Bladder cancer, 05220: Chronic myeloid leukemia	9.10589	9.12974	9.23401	9.2558	9.22217	9.20697	9.61781	9.61581
92335	STRADA	STE20-related kinase adaptor alpha	GO:0004674: protein serine/threonine kinase activity, GO:0005515: protein binding, GO:0005524: ATP binding, GO:0005634: nucleus, GO:0005737: cytoplasm, GO:0005829: cytosol, GO:0006611: protein export from nucleus, GO:0007050: cell cycle arrest, GO:0008286: insulin receptor signaling pathway, GO:0019900: kinase binding, GO:0030295: protein kinase activator activity, GO:0032147: activation of prote…	04150: mTOR signaling pathway	6.61074	6.62265	6.59733	6.58893	6.66286	6.63515	6.85074	6.94942
677767	SCARNA7	small Cajal body-specific RNA 7			7.11284	7.05898	7.02776	7.03519	7.2099	7.18093	7.62893	7.70039
339166	LOC339166	uncharacterized LOC339166			3.44549	3.53517	3.51097	3.47111	3.44476	3.47985	3.83732	3.85674
23647	ARFIP2	ADP-ribosylation factor interacting protein 2	GO:0001726: ruffle, GO:0005515: protein binding, GO:0005525: GTP binding, GO:0005737: cytoplasm, GO:0005886: plasma membrane, GO:0005938: cell cortex, GO:0006928: cellular component movement, GO:0007264: small GTPase mediated signal transduction, GO:0019904: protein domain specific binding, GO:0030032: lamellipodium assembly, GO:0030036: actin cytoskeleton organization, GO:0030742: GTP-dependent …		7.65588	7.63633	7.72519	7.62466	7.68986	7.66228	7.96766	7.98524
9871	SEC24D	SEC24 family, member D (S. cerevisiae)	GO:0000139: Golgi membrane, GO:0002474: antigen processing and presentation of peptide antigen via MHC class I, GO:0003674: molecular_function, GO:0005789: endoplasmic reticulum membrane, GO:0005829: cytosol, GO:0006886: intracellular protein transport, GO:0006888: ER to Golgi vesicle-mediated transport, GO:0006888: ER to Golgi vesicle-mediated transport, GO:0008270: zinc ion binding, GO:0012507:…	04141: Protein processing in endoplasmic reticulum	7.99252	7.98449	8.09682	7.98083	8.01634	8.01411	8.53502	8.48661
57549	IGSF9	immunoglobulin superfamily, member 9	GO:0005886: plasma membrane, GO:0016021: integral to membrane, GO:0016358: dendrite development, GO:0030054: cell junction, GO:0030425: dendrite, GO:0045202: synapse		4.9225	4.9958	4.94704	5.00938	5.04215	4.96587	5.44378	5.37507
100506235	LOC100506235	uncharacterized LOC100506235			2.61063	2.73359	2.51196	2.64065	2.81137	2.68653	3.64189	3.64189
170384	FUT11	fucosyltransferase 11 (alpha (1,3) fucosyltransferase)	GO:0006486: protein glycosylation, GO:0016021: integral to membrane, GO:0032580: Golgi cisterna membrane, GO:0046920: alpha-(1->3)-fucosyltransferase activity		7.09711	7.0644	7.06621	7.07461	7.0435	7.27074	7.82727	7.85729
653160	LOC653160	uncharacterized LOC653160	GO:0016021: integral to membrane		4.52152	4.60116	4.51903	4.392	4.50584	4.62219	4.97782	4.93245
10312	TCIRG1	T-cell, immune regulator 1, ATPase, H+ transporting, lysosomal V0 subunit A3	GO:0000220: vacuolar proton-transporting V-type ATPase, V0 domain, GO:0005215: transporter activity, GO:0005739: mitochondrion, GO:0005886: plasma membrane, GO:0005887: integral to plasma membrane, GO:0006879: cellular iron ion homeostasis, GO:0006968: cellular defense response, GO:0008284: positive regulation of cell proliferation, GO:0008286: insulin receptor signaling pathway, GO:0010008: endo…	00190: Oxidative phosphorylation, 01100: Metabolic pathways, 04142: Lysosome, 04145: Phagosome, 04966: Collecting duct acid secretion, 05110: Vibrio cholerae infection, 05120: Epithelial cell signaling in Helicobacter pylori infection, 05323: Rheumatoid arthritis	7.91373	7.83737	8.00681	8.01574	8.12347	8.12328	8.54415	8.50015
1628	DBP	D site of albumin promoter (albumin D-box) binding protein	GO:0000977: RNA polymerase II regulatory region sequence-specific DNA binding, GO:0001077: RNA polymerase II core promoter proximal region sequence-specific DNA binding transcription factor activity involved in positive regulation of transcription, GO:0005634: nucleus, GO:0006357: regulation of transcription from RNA polymerase II promoter, GO:0042127: regulation of cell proliferation, GO:0045944…		5.73044	5.35474	5.86444	5.82909	6.32841	6.34671	7.53786	7.57271
9415	FADS2	fatty acid desaturase 2	GO:0004768: stearoyl-CoA 9-desaturase activity, GO:0005789: endoplasmic reticulum membrane, GO:0005887: integral to plasma membrane, GO:0006636: unsaturated fatty acid biosynthetic process, GO:0020037: heme binding, GO:0022900: electron transport chain	00592: alpha-Linolenic acid metabolism, 01040: Biosynthesis of unsaturated fatty acids, 03320: PPAR signaling pathway	10.4746	10.4905	10.5541	10.5146	10.5824	10.5882	10.9034	10.8473
25829	TMEM184B	transmembrane protein 184B	GO:0016021: integral to membrane		8.4296	8.44896	8.44629	8.46798	8.54015	8.58225	8.8233	8.85423
3268	AGFG2	ArfGAP with FG repeats 2	GO:0003674: molecular_function, GO:0005575: cellular_component, GO:0008060: ARF GTPase activator activity, GO:0008150: biological_process, GO:0008270: zinc ion binding, GO:0032312: regulation of ARF GTPase activity		7.43913	7.28476	7.26684	7.25659	7.90094	7.86984	8.62344	8.59642
8694	DGAT1	diacylglycerol O-acyltransferase 1	GO:0003846: 2-acylglycerol O-acyltransferase activity, GO:0004144: diacylglycerol O-acyltransferase activity, GO:0005504: fatty acid binding, GO:0005789: endoplasmic reticulum membrane, GO:0006641: triglyceride metabolic process, GO:0016021: integral to membrane, GO:0016746: transferase activity, transferring acyl groups, GO:0019432: triglyceride biosynthetic process, GO:0019432: triglyceride bio…	00561: Glycerolipid metabolism, 00830: Retinol metabolism, 01100: Metabolic pathways, 04975: Fat digestion and absorption	6.7311	6.73377	6.82999	6.78327	7.07592	7.0764	7.37931	7.35432
8553	BHLHE40	basic helix-loop-helix family, member e40	GO:0000122: negative regulation of transcription from RNA polymerase II promoter, GO:0000981: sequence-specific DNA binding RNA polymerase II transcription factor activity, GO:0001078: RNA polymerase II core promoter proximal region sequence-specific DNA binding transcription factor activity involved in negative regulation of transcription, GO:0001102: RNA polymerase II activating transcription f…	04710: Circadian rhythm - mammal	9.50025	9.48887	9.55132	9.59184	10.0367	9.92724	10.5119	10.5646
10211	FLOT1	flotillin 1	GO:0005515: protein binding, GO:0005768: endosome, GO:0005815: microtubule organizing center, GO:0005901: caveola, GO:0007409: axonogenesis, GO:0008180: signalosome, GO:0016021: integral to membrane, GO:0016600: flotillin complex, GO:0034451: centriolar satellite, GO:0035023: regulation of Rho protein signal transduction, GO:0042383: sarcolemma, GO:0042470: melanosome, GO:0045121: membrane raft, …	04910: Insulin signaling pathway	7.85263	7.85681	7.92439	7.91965	8.13758	8.10808	8.50801	8.49935
726	CAPN5	calpain 5	GO:0001541: ovarian follicle development, GO:0001553: luteinization, GO:0004198: calcium-dependent cysteine-type endopeptidase activity, GO:0005622: intracellular, GO:0006508: proteolysis, GO:0007165: signal transduction, GO:0060014: granulosa cell differentiation		7.50061	7.48789	7.4098	7.3855	7.60134	7.54583	7.97659	7.85978
3678	ITGA5	integrin, alpha 5 (fibronectin receptor, alpha polypeptide)	GO:0001525: angiogenesis, GO:0001726: ruffle, GO:0005161: platelet-derived growth factor receptor binding, GO:0005178: integrin binding, GO:0005515: protein binding, GO:0005886: plasma membrane, GO:0005911: cell-cell junction, GO:0005925: focal adhesion, GO:0007044: cell-substrate junction assembly, GO:0007155: cell adhesion, GO:0007157: heterophilic cell-cell adhesion, GO:0007159: leukocyte cell…	04145: Phagosome, 04510: Focal adhesion, 04512: ECM-receptor interaction, 04640: Hematopoietic cell lineage, 04810: Regulation of actin cytoskeleton, 05100: Bacterial invasion of epithelial cells, 05131: Shigellosis, 05410: Hypertrophic cardiomyopathy (HCM), 05412: Arrhythmogenic right ventricular cardiomyopathy (ARVC), 05414: Dilated cardiomyopathy	8.83584	8.77873	8.83374	8.83163	8.96229	8.91785	9.31231	9.28413
25942	SIN3A	SIN3 transcription regulator homolog A (yeast)	GO:0000776: kinetochore, GO:0001106: RNA polymerase II transcription corepressor activity, GO:0001701: in utero embryonic development, GO:0003677: DNA binding, GO:0003682: chromatin binding, GO:0003700: sequence-specific DNA binding transcription factor activity, GO:0003714: transcription corepressor activity, GO:0005515: protein binding, GO:0005634: nucleus, GO:0005654: nucleoplasm, GO:0005667: …	05016: Huntington's disease	7.37938	7.31029	7.29196	7.31539	7.45607	7.3976	7.80558	7.73939
887	CCKBR	cholecystokinin B receptor	GO:0001821: histamine secretion, GO:0002209: behavioral defense response, GO:0004435: phosphatidylinositol phospholipase C activity, GO:0004951: cholecystokinin receptor activity, GO:0005634: nucleus, GO:0005737: cytoplasm, GO:0005886: plasma membrane, GO:0005887: integral to plasma membrane, GO:0006915: apoptotic process, GO:0007166: cell surface receptor signaling pathway, GO:0007200: phospholi…	04020: Calcium signaling pathway, 04080: Neuroactive ligand-receptor interaction, 04971: Gastric acid secretion	3.46149	3.47064	3.37452	3.24272	3.47243	3.39438	3.65124	3.72631
63908	NAPB	N-ethylmaleimide-sensitive factor attachment protein, beta	GO:0005622: intracellular, GO:0006886: intracellular protein transport, GO:0010807: regulation of synaptic vesicle priming, GO:0019905: syntaxin binding, GO:0035249: synaptic transmission, glutamatergic, GO:0035494: SNARE complex disassembly, GO:0070044: synaptobrevin 2-SNAP-25-syntaxin-1a complex		4.54709	4.55879	4.36429	4.27457	4.50252	4.39157	4.95318	5.24071
8554	PIAS1	protein inhibitor of activated STAT, 1	GO:0000122: negative regulation of transcription from RNA polymerase II promoter, GO:0003677: DNA binding, GO:0003713: transcription coactivator activity, GO:0003714: transcription corepressor activity, GO:0005515: protein binding, GO:0005634: nucleus, GO:0005654: nucleoplasm, GO:0006351: transcription, DNA-dependent, GO:0007259: JAK-STAT cascade, GO:0008270: zinc ion binding, GO:0016607: nuclear…	04120: Ubiquitin mediated proteolysis, 04630: Jak-STAT signaling pathway, 05160: Hepatitis C, 05200: Pathways in cancer, 05222: Small cell lung cancer	8.00856	8.00648	7.94388	7.88476	7.95822	7.94888	8.23243	8.22715
2997	GYS1	glycogen synthase 1 (muscle)	GO:0004373: glycogen (starch) synthase activity, GO:0005515: protein binding, GO:0005536: glucose binding, GO:0005829: cytosol, GO:0005975: carbohydrate metabolic process, GO:0005978: glycogen biosynthetic process, GO:0005978: glycogen biosynthetic process, GO:0005978: glycogen biosynthetic process, GO:0006006: glucose metabolic process, GO:0007507: heart development, GO:0016234: inclusion body, …	00500: Starch and sucrose metabolism, 04910: Insulin signaling pathway	7.07721	6.97523	6.97763	6.74411	7.06386	6.94567	7.66212	7.77307
10493	VAT1	vesicle amine transport protein 1 homolog (T. californica)	GO:0000166: nucleotide binding, GO:0005741: mitochondrial outer membrane, GO:0008270: zinc ion binding, GO:0010637: negative regulation of mitochondrial fusion, GO:0016021: integral to membrane, GO:0016491: oxidoreductase activity		9.19541	9.05632	8.99836	9.00929	9.10081	9.1524	9.39992	9.42027
64855	FAM129B	family with sequence similarity 129, member B	GO:0005543: phospholipid binding, GO:0005829: cytosol, GO:0005912: adherens junction, GO:0043066: negative regulation of apoptotic process		9.2915	9.25058	9.1514	9.20789	9.28768	9.21445	9.41828	9.44635
26799	SNORD50A	small nucleolar RNA, C/D box 50A			7.66245	7.37044	7.1849	7.21491	7.59866	7.43328	8.03427	8.10933
10144	FAM13A	family with sequence similarity 13, member A	GO:0005096: GTPase activator activity, GO:0005829: cytosol, GO:0007264: small GTPase mediated signal transduction, GO:0051056: regulation of small GTPase mediated signal transduction		5.18418	5.2451	4.9269	4.93808	5.33951	5.1443	5.90989	5.88747
29923	HILPDA	hypoxia inducible lipid droplet-associated	GO:0001819: positive regulation of cytokine production, GO:0005102: receptor binding, GO:0005615: extracellular space, GO:0005811: lipid particle, GO:0006950: response to stress, GO:0008284: positive regulation of cell proliferation, GO:0009986: cell surface, GO:0010884: positive regulation of lipid storage, GO:0016021: integral to membrane, GO:0030141: secretory granule, GO:0035425: autocrine si…		6.05549	6.11167	5.45924	5.61128	6.16565	5.8557	7.18838	7.04155
55904	MLL5	myeloid/lymphoid or mixed-lineage leukemia 5 (trithorax homolog, Drosophila)	GO:0002446: neutrophil mediated immunity, GO:0003713: transcription coactivator activity, GO:0005515: protein binding, GO:0006306: DNA methylation, GO:0006351: transcription, DNA-dependent, GO:0007050: cell cycle arrest, GO:0008270: zinc ion binding, GO:0016607: nuclear speck, GO:0019899: enzyme binding, GO:0030218: erythrocyte differentiation, GO:0030854: positive regulation of granulocyte diffe…		8.72795	8.72568	8.45714	8.46227	8.72677	8.65137	9.06975	9.06412
26788	SNORD60	small nucleolar RNA, C/D box 60			7.74526	7.61802	7.00317	7.06534	7.75617	7.67897	8.17691	8.7011
692208	SNORD91B	small nucleolar RNA, C/D box 91B			7.85474	7.61397	7.30599	6.99986	7.73397	7.83928	8.40157	8.74522
57700	FAM160B1	family with sequence similarity 160, member B1			7.7205	7.75781	7.59973	7.52716	7.70789	7.71903	7.9146	8.02088
145814	PGPEP1L	pyroglutamyl-peptidase I-like	GO:0006508: proteolysis, GO:0008234: cysteine-type peptidase activity		3.07116	3.06765	2.78015	2.69488	2.92592	3.00773	3.23719	3.45791
3430	IFI35	interferon-induced protein 35	GO:0005515: protein binding, GO:0005634: nucleus, GO:0005829: cytosol, GO:0006955: immune response, GO:0009615: response to virus, GO:0019221: cytokine-mediated signaling pathway, GO:0060337: type I interferon-mediated signaling pathway		6.80564	6.84667	6.66288	6.61902	6.78336	6.85112	6.96577	7.04853
55758	RCOR3	REST corepressor 3	GO:0003677: DNA binding, GO:0005515: protein binding, GO:0005634: nucleus, GO:0006351: transcription, DNA-dependent, GO:0006355: regulation of transcription, DNA-dependent		6.59326	6.58185	6.3035	6.13578	6.59688	6.51777	6.79097	6.82828
84221	C21orf56	chromosome 21 open reading frame 56	GO:0003674: molecular_function, GO:0005575: cellular_component, GO:0008150: biological_process		5.72011	5.69057	5.57042	5.42333	5.66034	5.60106	5.84301	5.79123
57153	SLC44A2	solute carrier family 44, member 2	GO:0004871: signal transducer activity, GO:0005886: plasma membrane, GO:0007165: signal transduction, GO:0015220: choline transmembrane transporter activity, GO:0015871: choline transport, GO:0016021: integral to membrane, GO:0043123: positive regulation of I-kappaB kinase/NF-kappaB cascade, GO:0055085: transmembrane transport		9.55643	9.51381	9.36122	9.42579	9.41936	9.42815	9.55611	9.60599
474	ATOH1	atonal homolog 1 (Drosophila)	GO:0001764: neuron migration, GO:0003700: sequence-specific DNA binding transcription factor activity, GO:0005634: nucleus, GO:0006355: regulation of transcription, DNA-dependent, GO:0006366: transcription from RNA polymerase II promoter, GO:0006915: apoptotic process, GO:0007411: axon guidance, GO:0007417: central nervous system development, GO:0021987: cerebral cortex development, GO:0031490: c…		4.85976	4.89073	4.52118	4.70745	4.68584	4.70745	4.99042	5.0065
1750	DLX6	distal-less homeobox 6	GO:0000976: transcription regulatory region sequence-specific DNA binding, GO:0001501: skeletal system development, GO:0003700: sequence-specific DNA binding transcription factor activity, GO:0005634: nucleus, GO:0006355: regulation of transcription, DNA-dependent, GO:0007399: nervous system development, GO:0030326: embryonic limb morphogenesis, GO:0030855: epithelial cell differentiation, GO:004…		4.90059	4.92057	4.25682	4.55712	4.42235	4.63404	4.9847	5.03036
343702	XKR7	XK, Kell blood group complex subunit-related family, member 7	GO:0016021: integral to membrane		3.677	3.71291	3.4425	3.5241	3.37187	3.59879	3.84123	3.91559
658	BMPR1B	bone morphogenetic protein receptor, type IB	GO:0001501: skeletal system development, GO:0001502: cartilage condensation, GO:0001550: ovarian cumulus expansion, GO:0001654: eye development, GO:0004674: protein serine/threonine kinase activity, GO:0004675: transmembrane receptor protein serine/threonine kinase activity, GO:0004675: transmembrane receptor protein serine/threonine kinase activity, GO:0004702: receptor signaling protein serine/…	04060: Cytokine-cytokine receptor interaction, 04350: TGF-beta signaling pathway	1.50058	1.40095	1.1683	1.27376	1.0854	1.2318	1.67726	1.49063
55667	DENND4C	DENN/MADD domain containing 4C	GO:0016021: integral to membrane		6.7752	6.74743	6.64149	6.61092	6.58179	6.57559	6.83887	6.82452
3399	ID3	inhibitor of DNA binding 3, dominant negative helix-loop-helix protein	GO:0000122: negative regulation of transcription from RNA polymerase II promoter, GO:0001656: metanephros development, GO:0003700: sequence-specific DNA binding transcription factor activity, GO:0003714: transcription corepressor activity, GO:0005634: nucleus, GO:0005737: cytoplasm, GO:0006275: regulation of DNA replication, GO:0006351: transcription, DNA-dependent, GO:0007275: multicellular orga…	04350: TGF-beta signaling pathway	6.81408	6.65095	6.04604	6.02477	6.03387	5.81139	6.90983	6.89215
100131089	LOC100131089	uncharacterized LOC100131089			2.56261	2.4792	2.38874	2.4153	2.39997	2.40957	2.74407	2.64753
7436	VLDLR	very low density lipoprotein receptor	GO:0000122: negative regulation of transcription from RNA polymerase II promoter, GO:0001948: glycoprotein binding, GO:0005041: low-density lipoprotein receptor activity, GO:0005509: calcium ion binding, GO:0005515: protein binding, GO:0005634: nucleus, GO:0005886: plasma membrane, GO:0005905: coated pit, GO:0006869: lipid transport, GO:0006898: receptor-mediated endocytosis, GO:0007165: signal t…		4.55483	4.58426	4.18997	4.28746	4.40287	4.22481	5.39036	5.12228
3939	LDHA	lactate dehydrogenase A	GO:0000166: nucleotide binding, GO:0004459: L-lactate dehydrogenase activity, GO:0005739: mitochondrion, GO:0005829: cytosol, GO:0006090: pyruvate metabolic process, GO:0006096: glycolysis, GO:0019861: flagellum, GO:0031668: cellular response to extracellular stimulus, GO:0044262: cellular carbohydrate metabolic process, GO:0044281: small molecule metabolic process	00010: Glycolysis / Gluconeogenesis, 00270: Cysteine and methionine metabolism, 00620: Pyruvate metabolism, 00640: Propanoate metabolism, 01100: Metabolic pathways	7.65629	7.73473	7.47566	7.52622	7.51654	7.30946	8.0573	8.13289
100129935	LOC100129935	lectin, galactoside-binding, soluble, 14 pseudogene			1.53721	1.50224	1.40046	1.27675	1.38635	1.29969	1.72039	1.71824
692086	SNORD17	small nucleolar RNA, C/D box 17			5.17198	5.18972	5.04155	4.87412	4.96384	5.10631	5.38715	5.36899
5308	PITX2	paired-like homeodomain 2	GO:0000122: negative regulation of transcription from RNA polymerase II promoter, GO:0000976: transcription regulatory region sequence-specific DNA binding, GO:0001078: RNA polymerase II core promoter proximal region sequence-specific DNA binding transcription factor activity involved in negative regulation of transcription, GO:0001085: RNA polymerase II transcription factor binding, GO:0001102: …	04350: TGF-beta signaling pathway	5.5098	5.66438	5.3029	5.38846	5.45004	5.52387	5.8239	5.82771
23179	RGL1	ral guanine nucleotide dissociation stimulator-like 1	GO:0005575: cellular_component, GO:0005829: cytosol, GO:0007264: small GTPase mediated signal transduction, GO:0008321: Ral guanyl-nucleotide exchange factor activity, GO:0044255: cellular lipid metabolic process, GO:0044281: small molecule metabolic process, GO:0051056: regulation of small GTPase mediated signal transduction		7.20288	7.27697	7.06924	7.06554	7.18925	7.15609	7.42964	7.33142
84164	ASCC2	activating signal cointegrator 1 complex subunit 2	GO:0006351: transcription, DNA-dependent, GO:0006355: regulation of transcription, DNA-dependent		7.62546	7.64891	7.58929	7.59864	7.61087	7.59898	7.68272	7.67308
140459	ASB6	ankyrin repeat and SOCS box containing 6	GO:0005737: cytoplasm, GO:0016567: protein ubiquitination, GO:0035556: intracellular signal transduction		7.24495	7.23121	7.19406	7.21583	7.09413	7.08829	7.43823	7.3306
79759	ZNF668	zinc finger protein 668	GO:0003677: DNA binding, GO:0005634: nucleus, GO:0006351: transcription, DNA-dependent, GO:0006355: regulation of transcription, DNA-dependent, GO:0008270: zinc ion binding		5.33997	5.2125	5.23178	5.23175	5.02413	5.11147	5.39998	5.39093
8842	PROM1	prominin 1	GO:0001750: photoreceptor outer segment, GO:0005515: protein binding, GO:0005615: extracellular space, GO:0005886: plasma membrane, GO:0005887: integral to plasma membrane, GO:0005903: brush border, GO:0009986: cell surface, GO:0010842: retina layer formation, GO:0016324: apical plasma membrane, GO:0031528: microvillus membrane, GO:0032420: stereocilium, GO:0042622: photoreceptor outer segment me…		2.07465	1.99576	1.96133	2.03352	1.93616	1.9305	2.14817	2.1754
100616334	MIR4790	microRNA 4790			0.95454	0.95454	0.978829	0.95454	0.838819	0.87396	1.00494	1.03512
28642	TRAV39	T cell receptor alpha variable 39			1.76002	1.73413	1.83592	1.83206	1.50501	1.52419	1.90193	2.05952
7167	TPI1	triosephosphate isomerase 1	GO:0004807: triose-phosphate isomerase activity, GO:0004807: triose-phosphate isomerase activity, GO:0004807: triose-phosphate isomerase activity, GO:0005634: nucleus, GO:0005829: cytosol, GO:0005975: carbohydrate metabolic process, GO:0006006: glucose metabolic process, GO:0006094: gluconeogenesis, GO:0006094: gluconeogenesis, GO:0006096: glycolysis, GO:0006096: glycolysis, GO:0006098: pentose-p…	00010: Glycolysis / Gluconeogenesis, 00051: Fructose and mannose metabolism, 00562: Inositol phosphate metabolism, 01100: Metabolic pathways	5.47084	5.28507	5.4943	5.32794	4.92474	5.15092	5.84007	5.9174
63893	UBE2O	ubiquitin-conjugating enzyme E2O	GO:0004842: ubiquitin-protein ligase activity, GO:0005524: ATP binding	04120: Ubiquitin mediated proteolysis	6.8904	6.73535	7.02496	6.85334	6.47614	6.45362	7.3867	7.41776
5833	PCYT2	phosphate cytidylyltransferase 2, ethanolamine	GO:0004306: ethanolamine-phosphate cytidylyltransferase activity, GO:0005575: cellular_component, GO:0006646: phosphatidylethanolamine biosynthetic process, GO:0008654: phospholipid biosynthetic process	00564: Glycerophospholipid metabolism, 01100: Metabolic pathways	6.39884	6.31648	6.55152	6.40361	6.13312	6.14937	6.7971	6.83015
11221	DUSP10	dual specificity phosphatase 10	GO:0000188: inactivation of MAPK activity, GO:0002819: regulation of adaptive immune response, GO:0004721: phosphoprotein phosphatase activity, GO:0004725: protein tyrosine phosphatase activity, GO:0005634: nucleus, GO:0005737: cytoplasm, GO:0005794: Golgi apparatus, GO:0006470: protein dephosphorylation, GO:0006950: response to stress, GO:0007254: JNK cascade, GO:0017017: MAP kinase tyrosine/ser…	04010: MAPK signaling pathway	8.39734	8.37833	9.57573	9.60537	8.17559	8.17077	9.66383	9.70165
3162	HMOX1	heme oxygenase (decycling) 1	GO:0001525: angiogenesis, GO:0001935: endothelial cell proliferation, GO:0002246: wound healing involved in inflammatory response, GO:0002686: negative regulation of leukocyte migration, GO:0004392: heme oxygenase (decyclizing) activity, GO:0004392: heme oxygenase (decyclizing) activity, GO:0004630: phospholipase D activity, GO:0004871: signal transducer activity, GO:0005615: extracellular space,…	00860: Porphyrin and chlorophyll metabolism	6.95294	7.09482	11.2425	11.2778	6.52296	6.2759	11.4112	11.4178
407007	MIR222	microRNA 222			5.46281	5.47339	7.76594	7.71762	5.06168	4.87393	7.78057	7.82867
3949	LDLR	low density lipoprotein receptor	GO:0001948: glycoprotein binding, GO:0005041: low-density lipoprotein receptor activity, GO:0005509: calcium ion binding, GO:0005515: protein binding, GO:0005764: lysosome, GO:0005769: early endosome, GO:0005770: late endosome, GO:0005794: Golgi apparatus, GO:0005886: plasma membrane, GO:0005887: integral to plasma membrane, GO:0005905: coated pit, GO:0006629: lipid metabolic process, GO:0006897:…	04144: Endocytosis, 04976: Bile secretion, 05145: Toxoplasmosis, 05160: Hepatitis C	8.34352	8.43108	9.98285	9.92432	8.28355	8.15437	10.3016	10.3088
3157	HMGCS1	3-hydroxy-3-methylglutaryl-CoA synthase 1 (soluble)	GO:0001101: response to acid, GO:0001889: liver development, GO:0004421: hydroxymethylglutaryl-CoA synthase activity, GO:0005737: cytoplasm, GO:0005829: cytosol, GO:0006629: lipid metabolic process, GO:0006695: cholesterol biosynthetic process, GO:0007420: brain development, GO:0008144: drug binding, GO:0008299: isoprenoid biosynthetic process, GO:0008584: male gonad development, GO:0009645: resp…	00072: Synthesis and degradation of ketone bodies, 00280: Valine, leucine and isoleucine degradation, 00650: Butanoate metabolism, 00900: Terpenoid backbone biosynthesis, 01100: Metabolic pathways	8.09902	8.19228	9.2712	9.30766	7.64171	7.81074	9.38437	9.36194
3337	DNAJB1	DnaJ (Hsp40) homolog, subfamily B, member 1	GO:0005730: nucleolus, GO:0005737: cytoplasm, GO:0006986: response to unfolded protein, GO:0031072: heat shock protein binding, GO:0051082: unfolded protein binding, GO:0051085: chaperone mediated protein folding requiring cofactor, GO:0070389: chaperone cofactor-dependent protein refolding	04141: Protein processing in endoplasmic reticulum	8.55625	8.64561	10.9274	11.0329	7.92928	7.81761	10.9491	10.9212
64763	ZNF574	zinc finger protein 574	GO:0003677: DNA binding, GO:0005634: nucleus, GO:0006351: transcription, DNA-dependent, GO:0006355: regulation of transcription, DNA-dependent, GO:0008270: zinc ion binding		7.26234	7.33879	7.60713	7.58672	7.0597	7.13917	7.73859	7.74966
4864	NPC1	Niemann-Pick disease, type C1	GO:0004872: receptor activity, GO:0004888: transmembrane signaling receptor activity, GO:0005515: protein binding, GO:0005576: extracellular region, GO:0005635: nuclear envelope, GO:0005764: lysosome, GO:0005765: lysosomal membrane, GO:0005783: endoplasmic reticulum, GO:0005794: Golgi apparatus, GO:0005887: integral to plasma membrane, GO:0006486: protein glycosylation, GO:0006897: endocytosis, G…	04142: Lysosome	8.40106	8.46944	8.95226	8.87124	8.23002	8.29396	9.09842	9.0821
11044	PAPD7	PAP associated domain containing 7	GO:0003677: DNA binding, GO:0003887: DNA-directed DNA polymerase activity, GO:0005634: nucleus, GO:0006260: DNA replication, GO:0006302: double-strand break repair, GO:0007062: sister chromatid cohesion, GO:0007076: mitotic chromosome condensation, GO:0042493: response to drug, GO:0043221: SMC family protein binding, GO:0046872: metal ion binding, GO:0051301: cell division	03018: RNA degradation	7.71741	7.66136	8.15379	8.13684	7.57353	7.62715	8.32832	8.37418
7071	KLF10	Kruppel-like factor 10	GO:0000122: negative regulation of transcription from RNA polymerase II promoter, GO:0001501: skeletal system development, GO:0003677: DNA binding, GO:0003700: sequence-specific DNA binding transcription factor activity, GO:0005515: protein binding, GO:0005634: nucleus, GO:0006351: transcription, DNA-dependent, GO:0006917: induction of apoptosis, GO:0007179: transforming growth factor beta recept…		7.12781	7.08159	7.68269	7.73089	6.96597	7.0266	7.86598	7.961
22884	WDR37	WD repeat domain 37			6.58565	6.50501	7.09728	6.99255	6.36456	6.33873	7.17996	7.19277
5033	P4HA1	prolyl 4-hydroxylase, alpha polypeptide I	GO:0004656: procollagen-proline 4-dioxygenase activity, GO:0005506: iron ion binding, GO:0005739: mitochondrion, GO:0005783: endoplasmic reticulum, GO:0005788: endoplasmic reticulum lumen, GO:0016702: oxidoreductase activity, acting on single donors with incorporation of molecular oxygen, incorporation of two atoms of oxygen, GO:0018401: peptidyl-proline hydroxylation to 4-hydroxy-L-proline, GO:0…	00330: Arginine and proline metabolism, 01100: Metabolic pathways	7.37042	7.40168	8.48685	8.41165	6.87494	6.87107	8.78647	8.94096
96459	FNIP1	folliculin interacting protein 1	GO:0001932: regulation of protein phosphorylation, GO:0005515: protein binding, GO:0005737: cytoplasm		8.37267	8.40041	8.91061	8.94128	8.19393	8.1939	9.04906	9.1485
131408	FAM131A	family with sequence similarity 131, member A	GO:0005576: extracellular region		4.88236	4.84941	4.99571	4.99405	4.67458	4.67458	5.21093	5.18505
158405	KIAA1958	KIAA1958			4.3303	4.20525	4.38405	4.56254	3.95924	3.91845	4.73034	4.80796
9807	IP6K1	inositol hexakisphosphate kinase 1	GO:0000832: inositol hexakisphosphate 5-kinase activity, GO:0005524: ATP binding, GO:0005634: nucleus, GO:0005730: nucleolus, GO:0005737: cytoplasm, GO:0008440: inositol-1,4,5-trisphosphate 3-kinase activity, GO:0046854: phosphatidylinositol phosphorylation, GO:0052723: inositol hexakisphosphate 1-kinase activity, GO:0052724: inositol hexakisphosphate 3-kinase activity		7.01827	6.97454	7.28029	7.19367	6.73426	6.61127	7.39194	7.40938
401320	LOC401320	uncharacterized LOC401320			3.89228	3.84093	4.18841	4.30024	3.6135	3.47264	4.52834	4.42535
26118	WSB1	WD repeat and SOCS box containing 1	GO:0005515: protein binding, GO:0005622: intracellular, GO:0005622: intracellular, GO:0008150: biological_process, GO:0016567: protein ubiquitination, GO:0035556: intracellular signal transduction		7.99443	7.93119	8.29454	8.32512	7.76583	7.74485	8.46504	8.4186
1039	CDR2	cerebellar degeneration-related protein 2, 62kDa	GO:0003674: molecular_function, GO:0005515: protein binding, GO:0005634: nucleus, GO:0005737: cytoplasm		6.80182	6.77529	7.02121	7.08832	6.61937	6.58851	7.15699	7.18763
144455	E2F7	E2F transcription factor 7	GO:0003677: DNA binding, GO:0003700: sequence-specific DNA binding transcription factor activity, GO:0005667: transcription factor complex, GO:0006351: transcription, DNA-dependent, GO:0007049: cell cycle, GO:0008285: negative regulation of cell proliferation, GO:0042802: identical protein binding		8.83319	8.86508	9.20729	9.13811	8.58012	8.58807	9.24715	9.17998
6526	SLC5A3	solute carrier family 5 (sodium/myo-inositol cotransporter), member 3	GO:0005367: myo-inositol:sodium symporter activity, GO:0005886: plasma membrane, GO:0005887: integral to plasma membrane, GO:0006020: inositol metabolic process, GO:0006810: transport, GO:0007422: peripheral nervous system development, GO:0016021: integral to membrane, GO:0043576: regulation of respiratory gaseous exchange, GO:0055085: transmembrane transport		6.01989	6.27772	7.74328	7.63984	5.19759	5.16926	7.59116	7.55751
1955	MEGF9	multiple EGF-like-domains 9	GO:0005509: calcium ion binding, GO:0005575: cellular_component, GO:0008150: biological_process, GO:0016021: integral to membrane		6.04668	6.04397	6.50972	6.62357	5.54431	5.47114	6.53777	6.48437
3156	HMGCR	3-hydroxy-3-methylglutaryl-CoA reductase	GO:0004420: hydroxymethylglutaryl-CoA reductase (NADPH) activity, GO:0005789: endoplasmic reticulum membrane, GO:0006695: cholesterol biosynthetic process, GO:0008299: isoprenoid biosynthetic process, GO:0015936: coenzyme A metabolic process, GO:0016021: integral to membrane, GO:0044255: cellular lipid metabolic process, GO:0044281: small molecule metabolic process, GO:0050662: coenzyme binding, …	00900: Terpenoid backbone biosynthesis, 01100: Metabolic pathways, 04976: Bile secretion	7.904	7.94822	8.54459	8.55005	7.41421	7.3157	8.49621	8.61962
123	PLIN2	perilipin 2	GO:0005576: extracellular region, GO:0005634: nucleus, GO:0005783: endoplasmic reticulum, GO:0005811: lipid particle, GO:0005886: plasma membrane, GO:0014070: response to organic cyclic compound, GO:0015909: long-chain fatty acid transport, GO:0019915: lipid storage, GO:0042493: response to drug, GO:0044255: cellular lipid metabolic process, GO:0044281: small molecule metabolic process		7.95027	8.06676	8.82907	8.97393	7.43601	7.28172	8.90618	8.89666
57661	PHRF1	PHD and ring finger domains 1	GO:0005634: nucleus, GO:0006366: transcription from RNA polymerase II promoter, GO:0006397: mRNA processing, GO:0008270: zinc ion binding, GO:0019904: protein domain specific binding, GO:0070063: RNA polymerase binding		7.44834	7.41962	7.59868	7.58808	7.07064	7.13521	7.65948	7.58057
2194	FASN	fatty acid synthase	GO:0000166: nucleotide binding, GO:0004312: fatty acid synthase activity, GO:0004313: [acyl-carrier-protein] S-acetyltransferase activity, GO:0004314: [acyl-carrier-protein] S-malonyltransferase activity, GO:0004315: 3-oxoacyl-[acyl-carrier-protein] synthase activity, GO:0004316: 3-oxoacyl-[acyl-carrier-protein] reductase (NADPH) activity, GO:0004317: 3-hydroxypalmitoyl-[acyl-carrier-protein] deh…	00061: Fatty acid biosynthesis, 01100: Metabolic pathways, 04910: Insulin signaling pathway	7.60069	7.52135	8.01231	7.93	7.01636	7.07002	8.0814	8.06755
100507137	FP2234	uncharacterized LOC100507137			3.0194	3.02641	3.11367	3.22527	2.68817	2.74533	3.20617	3.18767
153830	RNF145	ring finger protein 145	GO:0008270: zinc ion binding, GO:0016021: integral to membrane		7.46793	7.55894	7.6518	7.71289	7.08138	7.12073	7.71554	7.60332
8079	MLF2	myeloid leukemia factor 2	GO:0005634: nucleus, GO:0005737: cytoplasm, GO:0006952: defense response		10.5488	10.5711	10.4955	10.4854	10.4283	10.4026	10.5034	10.5372
399715	LOC399715	uncharacterized LOC399715			3.11127	3.05866	2.88152	2.88416	2.60109	2.6045	2.90057	3.04568
623	BDKRB1	bradykinin receptor B1	GO:0001933: negative regulation of protein phosphorylation, GO:0002687: positive regulation of leukocyte migration, GO:0004947: bradykinin receptor activity, GO:0005783: endoplasmic reticulum, GO:0005886: plasma membrane, GO:0005887: integral to plasma membrane, GO:0006954: inflammatory response, GO:0007204: elevation of cytosolic calcium ion concentration, GO:0007205: protein kinase C-activating…	04020: Calcium signaling pathway, 04080: Neuroactive ligand-receptor interaction, 04610: Complement and coagulation cascades, 04810: Regulation of actin cytoskeleton	8.42	8.33051	8.17828	8.24291	7.76075	7.51572	8.11582	8.2082
2294	FOXF1	forkhead box F1	GO:0000122: negative regulation of transcription from RNA polymerase II promoter, GO:0001568: blood vessel development, GO:0001570: vasculogenesis, GO:0001701: in utero embryonic development, GO:0001756: somitogenesis, GO:0002053: positive regulation of mesenchymal cell proliferation, GO:0003197: endocardial cushion development, GO:0003214: cardiac left ventricle morphogenesis, GO:0003677: DNA bi…		6.3382	6.29875	6.27941	6.26317	5.97848	5.87385	6.26614	6.2753
3397	ID1	inhibitor of DNA binding 1, dominant negative helix-loop-helix protein	GO:0000122: negative regulation of transcription from RNA polymerase II promoter, GO:0001525: angiogenesis, GO:0001886: endothelial cell morphogenesis, GO:0003700: sequence-specific DNA binding transcription factor activity, GO:0005515: protein binding, GO:0005634: nucleus, GO:0005737: cytoplasm, GO:0006351: transcription, DNA-dependent, GO:0006915: apoptotic process, GO:0007179: transforming gro…	04350: TGF-beta signaling pathway	6.61657	6.74235	6.45776	6.25752	5.85575	5.88191	6.52194	6.39102
847	CAT	catalase	GO:0000302: response to reactive oxygen species, GO:0001666: response to hypoxia, GO:0004046: aminoacylase activity, GO:0004096: catalase activity, GO:0004096: catalase activity, GO:0005102: receptor binding, GO:0005758: mitochondrial intermembrane space, GO:0005764: lysosome, GO:0005777: peroxisome, GO:0005778: peroxisomal membrane, GO:0005782: peroxisomal matrix, GO:0005783: endoplasmic reticul…	00380: Tryptophan metabolism, 01100: Metabolic pathways, 04146: Peroxisome, 05014: Amyotrophic lateral sclerosis (ALS)	7.56137	7.54266	7.42592	7.39022	7.19408	7.17278	7.49246	7.356
51735	RAPGEF6	Rap guanine nucleotide exchange factor (GEF) 6	GO:0005085: guanyl-nucleotide exchange factor activity, GO:0005634: nucleus, GO:0005737: cytoplasm, GO:0005886: plasma membrane, GO:0007265: Ras protein signal transduction, GO:0017016: Ras GTPase binding, GO:0030742: GTP-dependent protein binding, GO:0043087: regulation of GTPase activity, GO:0051056: regulation of small GTPase mediated signal transduction		7.15735	7.08995	6.93611	6.877	6.47311	6.45105	6.90391	6.81554
729830	FAM160A1	family with sequence similarity 160, member A1			5.74913	5.74659	5.52212	5.52971	5.3225	5.14606	5.59121	5.46264
388551	CEACAM16	carcinoembryonic antigen-related cell adhesion molecule 16	GO:0005576: extracellular region, GO:0007605: sensory perception of sound, GO:0032426: stereocilium bundle tip		4.04685	4.07096	3.63208	3.71925	3.07035	3.40156	4.0437	3.81113
4035	LRP1	low density lipoprotein receptor-related protein 1	GO:0002020: protease binding, GO:0004872: receptor activity, GO:0005509: calcium ion binding, GO:0005515: protein binding, GO:0005634: nucleus, GO:0005768: endosome, GO:0005887: integral to plasma membrane, GO:0005905: coated pit, GO:0006898: receptor-mediated endocytosis, GO:0007205: protein kinase C-activating G-protein coupled receptor signaling pathway, GO:0007568: aging, GO:0008283: cell pro…	05010: Alzheimer's disease, 05144: Malaria	7.49568	7.36758	7.22903	7.25317	6.98279	7.14726	7.4285	7.36342
23360	FNBP4	formin binding protein 4			8.19874	8.15963	8.00645	8.11985	7.7149	7.78267	8.17187	8.16155
58472	SQRDL	sulfide quinone reductase-like (yeast)	GO:0000096: sulfur amino acid metabolic process, GO:0000098: sulfur amino acid catabolic process, GO:0005737: cytoplasm, GO:0005743: mitochondrial inner membrane, GO:0034641: cellular nitrogen compound metabolic process, GO:0044281: small molecule metabolic process, GO:0070221: sulfide oxidation, using sulfide:quinone oxidoreductase, GO:0070224: sulfide:quinone oxidoreductase activity		7.56203	7.56474	7.62744	7.58951	7.27878	7.34159	7.58769	7.56169
4853	NOTCH2	notch 2	GO:0000139: Golgi membrane, GO:0001709: cell fate determination, GO:0002011: morphogenesis of an epithelial sheet, GO:0002437: inflammatory response to antigenic stimulus, GO:0004872: receptor activity, GO:0005509: calcium ion binding, GO:0005515: protein binding, GO:0005576: extracellular region, GO:0005634: nucleus, GO:0005654: nucleoplasm, GO:0005789: endoplasmic reticulum membrane, GO:0005829…	04320: Dorso-ventral axis formation, 04330: Notch signaling pathway	9.37691	9.29013	9.32217	9.28592	8.94529	9.00431	9.33185	9.26973
338761	C1QL4	complement component 1, q subcomponent-like 4	GO:0005581: collagen		4.15314	4.10835	4.13353	4.191	3.89887	3.9805	4.23926	4.22123
7248	TSC1	tuberous sclerosis 1	GO:0001822: kidney development, GO:0001843: neural tube closure, GO:0001952: regulation of cell-matrix adhesion, GO:0005515: protein binding, GO:0005737: cytoplasm, GO:0005829: cytosol, GO:0005829: cytosol, GO:0005884: actin filament, GO:0005938: cell cortex, GO:0006407: rRNA export from nucleus, GO:0006417: regulation of translation, GO:0006813: potassium ion transport, GO:0007050: cell cycle ar…	04150: mTOR signaling pathway, 04910: Insulin signaling pathway	7.67087	7.5938	7.75443	7.70843	7.23671	7.22607	7.76831	7.74448
57621	ZBTB2	zinc finger and BTB domain containing 2	GO:0003677: DNA binding, GO:0005634: nucleus, GO:0006351: transcription, DNA-dependent, GO:0006355: regulation of transcription, DNA-dependent, GO:0008270: zinc ion binding		7.9141	7.85321	7.89846	7.83861	7.33638	7.28761	8.06237	8.04349
10457	GPNMB	glycoprotein (transmembrane) nmb	GO:0005178: integrin binding, GO:0005887: integral to plasma membrane, GO:0007155: cell adhesion, GO:0008201: heparin binding, GO:0008285: negative regulation of cell proliferation, GO:0016021: integral to membrane, GO:0042470: melanosome		10.1436	10.0727	10.1062	10.106	9.93445	9.92669	10.152	10.1267
1584	CYP11B1	cytochrome P450, family 11, subfamily B, polypeptide 1	GO:0004507: steroid 11-beta-monooxygenase activity, GO:0004507: steroid 11-beta-monooxygenase activity, GO:0005739: mitochondrion, GO:0005743: mitochondrial inner membrane, GO:0005743: mitochondrial inner membrane, GO:0006700: C21-steroid hormone biosynthetic process, GO:0006704: glucocorticoid biosynthetic process, GO:0006705: mineralocorticoid biosynthetic process, GO:0006805: xenobiotic metabo…	00140: Steroid hormone biosynthesis, 01100: Metabolic pathways	3.60682	3.76221	3.47434	3.41946	3.29988	3.33007	3.59715	3.77232
3445	IFNA8	interferon, alpha 8	GO:0005125: cytokine activity, GO:0005126: cytokine receptor binding, GO:0005576: extracellular region, GO:0005615: extracellular space, GO:0007596: blood coagulation, GO:0009615: response to virus, GO:0019221: cytokine-mediated signaling pathway, GO:0045087: innate immune response, GO:0060337: type I interferon-mediated signaling pathway, GO:0060338: regulation of type I interferon-mediated sign…	04060: Cytokine-cytokine receptor interaction, 04140: Regulation of autophagy, 04620: Toll-like receptor signaling pathway, 04622: RIG-I-like receptor signaling pathway, 04623: Cytosolic DNA-sensing pathway, 04630: Jak-STAT signaling pathway, 04650: Natural killer cell mediated cytotoxicity, 05160: Hepatitis C, 05320: Autoimmune thyroid disease	1.35033	1.48428	1.2832	1.23155	1.22081	1.2568	1.43309	1.44762
283953	TMEM114	transmembrane protein 114	GO:0005886: plasma membrane, GO:0016021: integral to membrane		2.97026	3.20018	2.83881	2.93647	2.62733	2.63148	3.20991	3.48682
387895	LOC387895	uncharacterized LOC387895			3.56538	3.77506	3.3903	3.41385	3.23093	3.26584	3.89847	3.93924
100616423	MIR4703	microRNA 4703			1.75731	1.85646	1.30331	1.69836	1.34675	1.2058	1.9921	1.97337
79955	PDZD7	PDZ domain containing 7	GO:0005515: protein binding, GO:0005634: nucleus, GO:0005929: cilium		3.4571	3.69903	3.53561	3.57951	3.18307	3.16066	3.84224	3.90993
27245	AHDC1	AT hook, DNA binding motif, containing 1	GO:0003677: DNA binding		5.82691	5.76676	5.63299	5.72228	5.40389	5.43038	6.01821	6.06142
9334	B4GALT5	UDP-Gal:betaGlcNAc beta 1,4- galactosyltransferase, polypeptide 5	GO:0000139: Golgi membrane, GO:0008378: galactosyltransferase activity, GO:0016021: integral to membrane, GO:0016266: O-glycan processing, GO:0018279: protein N-linked glycosylation via asparagine, GO:0032580: Golgi cisterna membrane, GO:0043687: post-translational protein modification, GO:0044267: cellular protein metabolic process, GO:0046872: metal ion binding	00512: Mucin type O-Glycan biosynthesis	9.24607	9.23396	9.17613	9.1923	9.01993	8.87909	9.38194	9.43137
10749	KIF1C	kinesin family member 1C	GO:0003774: motor activity, GO:0003777: microtubule motor activity, GO:0005524: ATP binding, GO:0005783: endoplasmic reticulum, GO:0005794: Golgi apparatus, GO:0005874: microtubule, GO:0006890: retrograde vesicle-mediated transport, Golgi to ER, GO:0007018: microtubule-based movement		8.90731	8.88345	8.81207	8.79548	8.75147	8.72376	8.89563	8.87996
693227	MIR642A	microRNA 642a			4.85031	4.89257	4.67571	4.51286	4.42908	4.25895	4.86544	4.75668
286967	FAM223B	family with sequence similarity 223, member B (non-protein coding)			1.66171	1.43161	1.12463	1.19902	1.16226	0.989785	1.40907	1.46563
23112	TNRC6B	trinucleotide repeat containing 6B	GO:0000166: nucleotide binding, GO:0000932: cytoplasmic mRNA processing body, GO:0003723: RNA binding, GO:0005829: cytosol, GO:0006417: regulation of translation, GO:0007219: Notch signaling pathway, GO:0010467: gene expression, GO:0031047: gene silencing by RNA		6.02144	6.09976	5.80458	5.88703	5.81545	5.85066	5.98861	6.00136
163183	SYNE4	spectrin repeat containing, nuclear envelope family member 4	GO:0003779: actin binding, GO:0031309: integral to nuclear outer membrane, GO:0045198: establishment of epithelial cell apical/basal polarity		3.44928	3.49475	3.11033	3.33581	3.0398	3.09537	3.37016	3.38658
677825	SNORA44	small nucleolar RNA, H/ACA box 44			5.67489	5.75064	5.29041	5.49015	5.29697	5.29782	5.59107	5.68473
100126342	MIR892A	microRNA 892a			1.49478	1.58017	1.17513	0.907382	0.943837	0.971957	1.14438	1.26856
9725	TMEM63A	transmembrane protein 63A	GO:0000166: nucleotide binding, GO:0005765: lysosomal membrane, GO:0016021: integral to membrane		7.34128	7.29443	7.19365	7.11323	7.16772	7.15526	7.24173	7.22196
7175	TPR	translocated promoter region, nuclear basket protein	GO:0000776: kinetochore, GO:0000777: condensed chromosome kinetochore, GO:0004828: serine-tRNA ligase activity, GO:0005515: protein binding, GO:0005524: ATP binding, GO:0005635: nuclear envelope, GO:0005643: nuclear pore, GO:0005654: nucleoplasm, GO:0005737: cytoplasm, GO:0005975: carbohydrate metabolic process, GO:0006434: seryl-tRNA aminoacylation, GO:0006606: protein import into nucleus, GO:00…	03013: RNA transport, 05200: Pathways in cancer, 05216: Thyroid cancer	8.7333	8.74854	8.57062	8.52981	8.50967	8.50583	8.69375	8.59156
6398	SECTM1	secreted and transmembrane 1	GO:0004871: signal transducer activity, GO:0005125: cytokine activity, GO:0005615: extracellular space, GO:0005794: Golgi apparatus, GO:0005886: plasma membrane, GO:0006955: immune response, GO:0007165: signal transduction, GO:0007498: mesoderm development, GO:0016021: integral to membrane, GO:0043123: positive regulation of I-kappaB kinase/NF-kappaB cascade		7.61928	7.48421	7.32445	7.31665	7.19693	7.17316	7.3068	7.4127
80012	PHC3	polyhomeotic homolog 3 (Drosophila)	GO:0003677: DNA binding, GO:0005634: nucleus, GO:0007275: multicellular organismal development, GO:0008270: zinc ion binding, GO:0015629: actin cytoskeleton, GO:0031519: PcG protein complex, GO:0035102: PRC1 complex		7.6172	7.57296	7.45	7.36179	7.19393	7.30195	7.41802	7.42028
4297	MLL	myeloid/lymphoid or mixed-lineage leukemia (trithorax homolog, Drosophila)	GO:0003680: AT DNA binding, GO:0003700: sequence-specific DNA binding transcription factor activity, GO:0005515: protein binding, GO:0005634: nucleus, GO:0005634: nucleus, GO:0006355: regulation of transcription, DNA-dependent, GO:0006366: transcription from RNA polymerase II promoter, GO:0006461: protein complex assembly, GO:0006915: apoptotic process, GO:0008270: zinc ion binding, GO:0032411: p…		7.80012	7.71318	7.55724	7.38209	7.11726	7.17672	7.48252	7.44173
5376	PMP22	peripheral myelin protein 22	GO:0005515: protein binding, GO:0005923: tight junction, GO:0007268: synaptic transmission, GO:0007422: peripheral nervous system development, GO:0008285: negative regulation of cell proliferation, GO:0010977: negative regulation of neuron projection development, GO:0016021: integral to membrane, GO:0032288: myelin assembly, GO:0043218: compact myelin		9.70761	9.75882	9.37848	9.46025	9.3335	9.40992	9.36111	9.38944
6652	SORD	sorbitol dehydrogenase	GO:0003939: L-iditol 2-dehydrogenase activity, GO:0003939: L-iditol 2-dehydrogenase activity, GO:0005615: extracellular space, GO:0005929: cilium, GO:0006006: glucose metabolic process, GO:0006062: sorbitol catabolic process, GO:0008270: zinc ion binding, GO:0008270: zinc ion binding, GO:0019861: flagellum, GO:0030246: carbohydrate binding, GO:0030317: sperm motility, GO:0030317: sperm motility, …	00051: Fructose and mannose metabolism, 01100: Metabolic pathways	6.61837	6.69393	6.25973	6.34005	6.31464	6.23898	6.24498	6.31753
338755	OR2AG2	olfactory receptor, family 2, subfamily AG, member 2	GO:0004930: G-protein coupled receptor activity, GO:0004984: olfactory receptor activity, GO:0005886: plasma membrane, GO:0016021: integral to membrane	04740: Olfactory transduction	3.43322	3.57353	3.02846	3.10801	2.84482	2.97757	3.13617	3.11942
55137	FIGN	fidgetin	GO:0005524: ATP binding, GO:0008022: protein C-terminus binding, GO:0016363: nuclear matrix, GO:0017111: nucleoside-triphosphatase activity		6.00436	5.94227	4.95951	5.17325	4.81448	4.80796	5.28593	5.17543
79659	DYNC2H1	dynein, cytoplasmic 2, heavy chain 1	GO:0003774: motor activity, GO:0003777: microtubule motor activity, GO:0005524: ATP binding, GO:0005794: Golgi apparatus, GO:0005874: microtubule, GO:0005886: plasma membrane, GO:0007018: microtubule-based movement, GO:0007030: Golgi organization, GO:0007275: multicellular organismal development, GO:0016887: ATPase activity, GO:0030030: cell projection organization, GO:0030286: dynein complex, GO…	04145: Phagosome, 04962: Vasopressin-regulated water reabsorption	6.24597	6.25039	5.90073	5.84112	5.83542	5.66237	5.84844	5.88579
55187	VPS13D	vacuolar protein sorting 13 homolog D (S. cerevisiae)	GO:0008104: protein localization		6.33667	6.29804	5.99645	5.90356	5.91021	5.95908	5.98043	5.94373
5152	PDE9A	phosphodiesterase 9A	GO:0004114: 3',5'-cyclic-nucleotide phosphodiesterase activity, GO:0005515: protein binding, GO:0005783: endoplasmic reticulum, GO:0005794: Golgi apparatus, GO:0005829: cytosol, GO:0005829: cytosol, GO:0007165: signal transduction, GO:0007596: blood coagulation, GO:0032587: ruffle membrane, GO:0046872: metal ion binding, GO:0047555: 3',5'-cyclic-GMP phosphodiesterase activity, GO:0048471: perinuc…	00230: Purine metabolism	3.76229	3.85504	3.47516	3.51034	3.56363	3.50875	3.66131	3.6277
100874147	LINC00366	long intergenic non-protein coding RNA 366			1.33641	1.39948	0.867791	0.902941	1.09803	0.933577	1.16422	1.14903
23616	SH3BP1	SH3-domain binding protein 1	GO:0005096: GTPase activator activity, GO:0005737: cytoplasm, GO:0007165: signal transduction, GO:0017124: SH3 domain binding		5.04586	4.99329	4.43308	4.55646	4.65027	4.60796	4.74079	4.57326
1371	CPOX	coproporphyrinogen oxidase	GO:0004109: coproporphyrinogen oxidase activity, GO:0005737: cytoplasm, GO:0005739: mitochondrion, GO:0005743: mitochondrial inner membrane, GO:0005758: mitochondrial intermembrane space, GO:0006778: porphyrin-containing compound metabolic process, GO:0006782: protoporphyrinogen IX biosynthetic process, GO:0006783: heme biosynthetic process, GO:0010039: response to iron ion, GO:0010288: response …	00860: Porphyrin and chlorophyll metabolism, 01100: Metabolic pathways	6.84361	6.84783	6.45196	6.46114	6.52235	6.43522	6.62354	6.55692
79829	NAA40	N(alpha)-acetyltransferase 40, NatD catalytic subunit, homolog (S. cerevisiae)	GO:0008080: N-acetyltransferase activity		7.96279	7.82274	7.16605	7.2446	7.39359	7.37708	7.34893	7.37904
1174	AP1S1	adaptor-related protein complex 1, sigma 1 subunit	GO:0000139: Golgi membrane, GO:0005765: lysosomal membrane, GO:0005829: cytosol, GO:0005905: coated pit, GO:0006886: intracellular protein transport, GO:0006892: post-Golgi vesicle-mediated transport, GO:0006898: receptor-mediated endocytosis, GO:0008565: protein transporter activity, GO:0009615: response to virus, GO:0016032: viral reproduction, GO:0016044: cellular membrane organization, GO:003…	04142: Lysosome	7.74959	7.66011	7.34445	7.35718	7.46142	7.49465	7.44408	7.48745
90379	DCAF15	DDB1 and CUL4 associated factor 15	GO:0016567: protein ubiquitination		7.06698	7.1463	6.66305	6.57923	6.72385	6.70517	6.73862	6.77665
9214	FAIM3	Fas apoptotic inhibitory molecule 3	GO:0006916: anti-apoptosis, GO:0006968: cellular defense response, GO:0016021: integral to membrane		2.9862	3.07201	2.71727	2.63264	2.76415	2.75679	2.76275	2.80085
23268	DNMBP	dynamin binding protein	GO:0005089: Rho guanyl-nucleotide exchange factor activity, GO:0005515: protein binding, GO:0005795: Golgi stack, GO:0005856: cytoskeleton, GO:0030054: cell junction, GO:0035023: regulation of Rho protein signal transduction, GO:0035556: intracellular signal transduction, GO:0045202: synapse		8.31281	8.33323	8.02774	7.99337	8.15013	8.10826	8.06907	8.14559
3692	EIF6	eukaryotic translation initiation factor 6	GO:0003743: translation initiation factor activity, GO:0005515: protein binding, GO:0005634: nucleus, GO:0005638: lamin filament, GO:0005730: nucleolus, GO:0005737: cytoplasm, GO:0042256: mature ribosome assembly, GO:0043022: ribosome binding	03008: Ribosome biogenesis in eukaryotes	9.87164	9.88238	9.55507	9.56352	9.79732	9.88294	9.80234	9.76175
79083	MLPH	melanophilin	GO:0003779: actin binding, GO:0006605: protein targeting, GO:0015629: actin cytoskeleton, GO:0017137: Rab GTPase binding, GO:0030318: melanocyte differentiation, GO:0031489: myosin V binding, GO:0032400: melanosome localization, GO:0042470: melanosome, GO:0046872: metal ion binding, GO:0051010: microtubule plus-end binding		8.12008	8.13278	7.59862	7.52024	8.07581	8.14295	7.89708	7.83851
123169	LEO1	Leo1, Paf1/RNA polymerase II complex component, homolog (S. cerevisiae)	GO:0001711: endodermal cell fate commitment, GO:0005515: protein binding, GO:0005634: nucleus, GO:0005730: nucleolus, GO:0006351: transcription, DNA-dependent, GO:0006378: mRNA polyadenylation, GO:0010390: histone monoubiquitination, GO:0016055: Wnt receptor signaling pathway, GO:0016593: Cdc73/Paf1 complex, GO:0019827: stem cell maintenance, GO:0031442: positive regulation of mRNA 3'-end process…		7.28549	7.3217	6.24166	6.01544	7.07744	7.244	6.83453	6.68225
54477	PLEKHA5	pleckstrin homology domain containing, family A member 5	GO:0005515: protein binding, GO:0005545: 1-phosphatidylinositol binding, GO:0005575: cellular_component, GO:0008150: biological_process		6.8597	6.86709	6.05893	6.07011	6.83415	6.7877	6.46144	6.52666
6347	CCL2	chemokine (C-C motif) ligand 2	GO:0000165: MAPK cascade, GO:0001525: angiogenesis, GO:0001666: response to hypoxia, GO:0001938: positive regulation of endothelial cell proliferation, GO:0002548: monocyte chemotaxis, GO:0004672: protein kinase activity, GO:0005102: receptor binding, GO:0005576: extracellular region, GO:0005576: extracellular region, GO:0005615: extracellular space, GO:0005737: cytoplasm, GO:0006468: protein pho…	04060: Cytokine-cytokine receptor interaction, 04062: Chemokine signaling pathway, 04621: NOD-like receptor signaling pathway, 05142: Chagas disease (American trypanosomiasis), 05144: Malaria, 05323: Rheumatoid arthritis	7.59693	7.49035	5.09304	5.42819	7.75572	7.82859	6.60448	6.85472
59339	PLEKHA2	pleckstrin homology domain containing, family A (phosphoinositide binding specific) member 2	GO:0001954: positive regulation of cell-matrix adhesion, GO:0001968: fibronectin binding, GO:0005515: protein binding, GO:0005545: 1-phosphatidylinositol binding, GO:0005634: nucleus, GO:0005737: cytoplasm, GO:0005886: plasma membrane, GO:0016020: membrane, GO:0030165: PDZ domain binding, GO:0043234: protein complex, GO:0043236: laminin binding		6.85656	6.79018	5.29024	5.3655	7.04776	6.89863	6.08452	6.22021
9203	ZMYM3	zinc finger, MYM-type 3	GO:0003677: DNA binding, GO:0005634: nucleus, GO:0007010: cytoskeleton organization, GO:0007275: multicellular organismal development, GO:0008270: zinc ion binding, GO:0022604: regulation of cell morphogenesis		6.18584	5.97031	4.96848	5.0513	6.06739	6.21447	5.71623	5.7203
57178	ZMIZ1	zinc finger, MIZ-type containing 1	GO:0005737: cytoplasm, GO:0006351: transcription, DNA-dependent, GO:0006355: regulation of transcription, DNA-dependent, GO:0008270: zinc ion binding, GO:0016607: nuclear speck		8.01378	7.94822	7.572	7.58258	7.95262	7.95154	7.84768	7.79521
221692	PHACTR1	phosphatase and actin regulator 1	GO:0003779: actin binding, GO:0004864: protein phosphatase inhibitor activity, GO:0005737: cytoplasm, GO:0030054: cell junction, GO:0045202: synapse		5.53992	5.60331	4.84281	4.93459	5.55401	5.51917	5.48244	5.45
8828	NRP2	neuropilin 2	GO:0001525: angiogenesis, GO:0001755: neural crest cell migration, GO:0001938: positive regulation of endothelial cell proliferation, GO:0002116: semaphorin receptor complex, GO:0004872: receptor activity, GO:0005021: vascular endothelial growth factor-activated receptor activity, GO:0005886: plasma membrane, GO:0007155: cell adhesion, GO:0007411: axon guidance, GO:0007411: axon guidance, GO:0007…		8.05357	8.01666	7.57132	7.60243	8.10083	8.11429	8.01967	7.92527
64759	TNS3	tensin 3	GO:0005515: protein binding, GO:0005925: focal adhesion, GO:0008284: positive regulation of cell proliferation, GO:0016477: cell migration, GO:0048286: lung alveolus development		7.39009	7.23567	6.35212	6.22105	7.44312	7.52128	7.32981	7.26715
100134259	LOC100134259	uncharacterized LOC100134259			4.73739	4.48223	3.43495	3.22177	5.07473	4.99306	4.73915	4.90598
9869	SETDB1	SET domain, bifurcated 1	GO:0003677: DNA binding, GO:0005515: protein binding, GO:0005634: nucleus, GO:0005694: chromosome, GO:0005737: cytoplasm, GO:0005794: Golgi apparatus, GO:0005886: plasma membrane, GO:0006351: transcription, DNA-dependent, GO:0006355: regulation of transcription, DNA-dependent, GO:0008270: zinc ion binding, GO:0018024: histone-lysine N-methyltransferase activity	00310: Lysine degradation	6.02882	5.96917	5.42784	5.44365	6.33137	6.24551	6.01624	5.98317
81849	ST6GALNAC5	ST6 (alpha-N-acetyl-neuraminyl-2,3-beta-galactosyl-1,3)-N-acetylgalactosaminide alpha-2,6-sialyltransferase 5	GO:0001665: alpha-N-acetylgalactosaminide alpha-2,6-sialyltransferase activity, GO:0006486: protein glycosylation, GO:0006688: glycosphingolipid biosynthetic process, GO:0008373: sialyltransferase activity, GO:0009312: oligosaccharide biosynthetic process, GO:0030173: integral to Golgi membrane	00604: Glycosphingolipid biosynthesis - ganglio series, 01100: Metabolic pathways	6.22807	6.24271	5.1684	5.10307	6.82517	6.81255	5.98976	5.93316
6925	TCF4	transcription factor 4	GO:0000978: RNA polymerase II core promoter proximal region sequence-specific DNA binding, GO:0001011: sequence-specific DNA binding RNA polymerase recruiting transcription factor activity, GO:0001077: RNA polymerase II core promoter proximal region sequence-specific DNA binding transcription factor activity involved in positive regulation of transcription, GO:0001087: TFIIB-class binding transcr…		7.2896	7.26025	6.31532	6.2798	7.483	7.5434	6.86822	7.02474
8614	STC2	stanniocalcin 2	GO:0005179: hormone activity, GO:0005576: extracellular region, GO:0007166: cell surface receptor signaling pathway, GO:0007267: cell-cell signaling, GO:0007566: embryo implantation, GO:0007584: response to nutrient, GO:0033280: response to vitamin D, GO:0043434: response to peptide hormone stimulus, GO:0046697: decidualization, GO:0071456: cellular response to hypoxia		9.35559	9.36159	8.85511	8.77862	9.52542	9.5193	9.23304	9.30883
54467	ANKIB1	ankyrin repeat and IBR domain containing 1	GO:0005515: protein binding, GO:0008270: zinc ion binding		9.07737	9.08072	8.86247	8.83857	9.04139	9.06766	9.17124	9.13794
10919	EHMT2	euchromatic histone-lysine N-methyltransferase 2	GO:0000122: negative regulation of transcription from RNA polymerase II promoter, GO:0000239: pachytene, GO:0002039: p53 binding, GO:0005515: protein binding, GO:0005634: nucleus, GO:0005694: chromosome, GO:0006275: regulation of DNA replication, GO:0006306: DNA methylation, GO:0007130: synaptonemal complex assembly, GO:0007286: spermatid development, GO:0008270: zinc ion binding, GO:0009566: fer…	00310: Lysine degradation	7.49811	7.4695	7.03805	6.9246	7.50793	7.45228	7.74371	7.57357
51141	INSIG2	insulin induced gene 2	GO:0005515: protein binding, GO:0006641: triglyceride metabolic process, GO:0006695: cholesterol biosynthetic process, GO:0008134: transcription factor binding, GO:0010894: negative regulation of steroid biosynthetic process, GO:0030967: ER-nuclear sterol response pathway, GO:0032868: response to insulin stimulus, GO:0032937: SREBP-SCAP-Insig complex, GO:0042472: inner ear morphogenesis, GO:00424…		6.41453	6.44935	5.84963	5.95416	6.3118	6.19738	6.56842	6.4067
57698	KIAA1598	KIAA1598	GO:0005829: cytosol, GO:0007411: axon guidance, GO:0019900: kinase binding, GO:0030424: axon		7.01348	7.02097	6.64905	6.65722	7.07782	7.00355	7.08703	7.01259
780	DDR1	discoidin domain receptor tyrosine kinase 1	GO:0001558: regulation of cell growth, GO:0001952: regulation of cell-matrix adhesion, GO:0004714: transmembrane receptor protein tyrosine kinase activity, GO:0005515: protein binding, GO:0005518: collagen binding, GO:0005518: collagen binding, GO:0005524: ATP binding, GO:0005576: extracellular region, GO:0005887: integral to plasma membrane, GO:0007155: cell adhesion, GO:0007566: embryo implanta…		6.83662	6.77788	6.30544	6.30134	6.86997	6.70671	6.77426	6.83881
94162	SNORD38A	small nucleolar RNA, C/D box 38A			4.37327	4.083	3.29757	3.0412	4.16674	4.03802	4.2514	4.38777
26791	SNORD58A	small nucleolar RNA, C/D box 58A			5.44419	5.14354	4.44434	4.37882	5.32255	5.00719	5.34327	5.36087
23070	FTSJD2	FtsJ methyltransferase domain containing 2	GO:0003676: nucleic acid binding, GO:0004483: mRNA (nucleoside-2'-O-)-methyltransferase activity, GO:0005634: nucleus, GO:0005737: cytoplasm, GO:0006370: 7-methylguanosine mRNA capping, GO:0080009: mRNA methylation		7.51097	7.54101	7.28696	7.31791	7.46824	7.44758	7.41743	7.47023
9464	HAND2	heart and neural crest derivatives expressed 2	GO:0000790: nuclear chromatin, GO:0000977: RNA polymerase II regulatory region sequence-specific DNA binding, GO:0001077: RNA polymerase II core promoter proximal region sequence-specific DNA binding transcription factor activity involved in positive regulation of transcription, GO:0001525: angiogenesis, GO:0001701: in utero embryonic development, GO:0001947: heart looping, GO:0001967: suckling b…		4.93776	5.01545	4.29064	4.41771	4.78973	4.81886	4.85594	5.02896
9788	MTSS1	metastasis suppressor 1	GO:0001726: ruffle, GO:0003785: actin monomer binding, GO:0005102: receptor binding, GO:0005515: protein binding, GO:0005737: cytoplasm, GO:0006928: cellular component movement, GO:0007155: cell adhesion, GO:0007169: transmembrane receptor protein tyrosine kinase signaling pathway, GO:0008093: cytoskeletal adaptor activity, GO:0015629: actin cytoskeleton, GO:0017124: SH3 domain binding, GO:003003…		7.14396	7.19919	6.57719	6.73743	7.04623	7.02126	7.1107	7.07562
100616369	MIR4713	microRNA 4713			2.53024	2.68187	2.13589	2.23308	2.38651	2.53458	2.58903	2.60914
146923	RUNDC1	RUN domain containing 1			6.67781	6.66464	6.24199	6.2714	6.48484	6.44551	6.60366	6.55038
1837	DTNA	dystrobrevin, alpha	GO:0005509: calcium ion binding, GO:0005515: protein binding, GO:0005737: cytoplasm, GO:0005886: plasma membrane, GO:0006941: striated muscle contraction, GO:0007165: signal transduction, GO:0007268: synaptic transmission, GO:0007274: neuromuscular synaptic transmission, GO:0008270: zinc ion binding, GO:0030054: cell junction, GO:0045202: synapse		5.36853	5.47783	4.88668	4.94608	5.12276	5.13169	5.34943	5.28425
9498	SLC4A8	solute carrier family 4, sodium bicarbonate cotransporter, member 8	GO:0005452: inorganic anion exchanger activity, GO:0005886: plasma membrane, GO:0006811: ion transport, GO:0006814: sodium ion transport, GO:0015701: bicarbonate transport, GO:0016021: integral to membrane, GO:0055085: transmembrane transport		3.15944	3.19611	2.59523	2.74533	2.8968	2.8968	2.93949	3.04202
85477	SCIN	scinderin	GO:0001786: phosphatidylserine binding, GO:0003779: actin binding, GO:0003779: actin binding, GO:0005509: calcium ion binding, GO:0005509: calcium ion binding, GO:0005545: 1-phosphatidylinositol binding, GO:0005546: phosphatidylinositol-4,5-bisphosphate binding, GO:0005737: cytoplasm, GO:0005737: cytoplasm, GO:0005856: cytoskeleton, GO:0005938: cell cortex, GO:0008285: negative regulation of cell…	04666: Fc gamma R-mediated phagocytosis, 04810: Regulation of actin cytoskeleton	4.20944	4.35671	3.79378	3.82207	4.02828	3.97469	4.08124	4.09897
25790	CCDC19	coiled-coil domain containing 19	GO:0005739: mitochondrion		4.66847	4.73801	4.22058	4.19481	4.30359	4.52299	4.53872	4.52178
1027	CDKN1B	cyclin-dependent kinase inhibitor 1B (p27, Kip1)	GO:0000075: cell cycle checkpoint, GO:0000079: regulation of cyclin-dependent protein kinase activity, GO:0000080: G1 phase of mitotic cell cycle, GO:0000082: G1/S transition of mitotic cell cycle, GO:0000082: G1/S transition of mitotic cell cycle, GO:0000084: S phase of mitotic cell cycle, GO:0000278: mitotic cell cycle, GO:0004861: cyclin-dependent protein kinase inhibitor activity, GO:0005072:…	04012: ErbB signaling pathway, 04110: Cell cycle, 05200: Pathways in cancer, 05215: Prostate cancer, 05220: Chronic myeloid leukemia, 05222: Small cell lung cancer	7.62879	7.76603	7.28721	7.05912	7.43954	7.36958	7.6489	7.55269
971	CD72	CD72 molecule	GO:0004888: transmembrane signaling receptor activity, GO:0005102: receptor binding, GO:0005515: protein binding, GO:0005886: plasma membrane, GO:0005887: integral to plasma membrane, GO:0007155: cell adhesion, GO:0007411: axon guidance, GO:0030246: carbohydrate binding	04662: B cell receptor signaling pathway	3.04499	3.21151	2.70038	2.6463	2.90561	2.96859	3.00405	2.94017
29882	ANAPC2	anaphase promoting complex subunit 2	GO:0000075: cell cycle checkpoint, GO:0000079: regulation of cyclin-dependent protein kinase activity, GO:0000278: mitotic cell cycle, GO:0004842: ubiquitin-protein ligase activity, GO:0005654: nucleoplasm, GO:0005680: anaphase-promoting complex, GO:0005829: cytosol, GO:0006511: ubiquitin-dependent protein catabolic process, GO:0007067: mitosis, GO:0007094: mitotic cell cycle spindle assembly che…	04110: Cell cycle, 04114: Oocyte meiosis, 04120: Ubiquitin mediated proteolysis, 04914: Progesterone-mediated oocyte maturation	6.12052	6.22993	5.85798	5.75894	6.0406	5.9918	6.01578	6.0401
340075	ARSI	arylsulfatase family, member I	GO:0004065: arylsulfatase activity, GO:0005576: extracellular region, GO:0005783: endoplasmic reticulum, GO:0046872: metal ion binding		7.21295	7.13318	6.27907	6.25881	6.94808	6.86304	7.01454	7.00254
51343	FZR1	fizzy/cell division cycle 20 related 1 (Drosophila)	GO:0000084: S phase of mitotic cell cycle, GO:0000278: mitotic cell cycle, GO:0005515: protein binding, GO:0005654: nucleoplasm, GO:0005680: anaphase-promoting complex, GO:0005829: cytosol, GO:0006281: DNA repair, GO:0007067: mitosis, GO:0008284: positive regulation of cell proliferation, GO:0031145: anaphase-promoting complex-dependent proteasomal ubiquitin-dependent protein catabolic process, G…	04110: Cell cycle, 04120: Ubiquitin mediated proteolysis, 04914: Progesterone-mediated oocyte maturation	7.42614	7.3914	6.91983	6.95434	7.32982	7.22983	7.3483	7.22702
113230	LOC113230	uncharacterized LOC113230			5.23806	5.08919	4.53093	4.46248	4.94248	4.7866	5.00413	4.88026
27148	STK36	serine/threonine kinase 36	GO:0000287: magnesium ion binding, GO:0004674: protein serine/threonine kinase activity, GO:0004674: protein serine/threonine kinase activity, GO:0005515: protein binding, GO:0005524: ATP binding, GO:0005524: ATP binding, GO:0005634: nucleus, GO:0005737: cytoplasm, GO:0006468: protein phosphorylation, GO:0006468: protein phosphorylation, GO:0007228: positive regulation of hh target transcription …	04340: Hedgehog signaling pathway, 05200: Pathways in cancer, 05217: Basal cell carcinoma	6.01057	5.92343	5.37057	5.14634	5.87029	5.78125	5.78148	5.72127
64062	RBM26	RNA binding motif protein 26	GO:0000166: nucleotide binding, GO:0003723: RNA binding, GO:0005515: protein binding, GO:0006397: mRNA processing, GO:0008270: zinc ion binding, GO:0010923: negative regulation of phosphatase activity		7.86955	7.85758	7.29464	7.08168	7.82205	7.77492	7.72895	7.63883
54497	HEATR5B	HEAT repeat containing 5B			6.73507	6.68586	6.35596	6.21839	6.64653	6.67361	6.65398	6.61889
6778	STAT6	signal transducer and activator of transcription 6, interleukin-4 induced	GO:0000122: negative regulation of transcription from RNA polymerase II promoter, GO:0000790: nuclear chromatin, GO:0002296: T-helper 1 cell lineage commitment, GO:0002829: negative regulation of type 2 immune response, GO:0003700: sequence-specific DNA binding transcription factor activity, GO:0004871: signal transducer activity, GO:0005509: calcium ion binding, GO:0005515: protein binding, GO:0…	04630: Jak-STAT signaling pathway	8.57381	8.55465	8.29694	8.20303	8.55796	8.51128	8.52601	8.50278
51107	APH1A	anterior pharynx defective 1 homolog A (C. elegans)	GO:0001656: metanephros development, GO:0004175: endopeptidase activity, GO:0005515: protein binding, GO:0005783: endoplasmic reticulum, GO:0005789: endoplasmic reticulum membrane, GO:0005794: Golgi apparatus, GO:0005886: plasma membrane, GO:0005887: integral to plasma membrane, GO:0006509: membrane protein ectodomain proteolysis, GO:0006915: apoptotic process, GO:0007219: Notch signaling pathway…	04330: Notch signaling pathway, 05010: Alzheimer's disease	7.81836	7.79319	7.38911	7.27393	7.79682	7.73467	7.79912	7.77465
79166	LILRP2	leukocyte immunoglobulin-like receptor pseudogene 2			3.13213	3.11008	2.85818	2.78643	2.9343	2.93406	3.06613	3.21048
30845	EHD3	EH-domain containing 3	GO:0003676: nucleic acid binding, GO:0003924: GTPase activity, GO:0005509: calcium ion binding, GO:0005515: protein binding, GO:0005524: ATP binding, GO:0005525: GTP binding, GO:0005634: nucleus, GO:0005737: cytoplasm, GO:0005886: plasma membrane, GO:0007596: blood coagulation, GO:0010008: endosome membrane, GO:0030139: endocytic vesicle, GO:0032456: endocytic recycling, GO:0051260: protein homoo…	04144: Endocytosis	4.28053	4.13886	3.58706	3.61186	3.80763	3.76346	3.85455	4.13582
728755	LOC728755	uncharacterized LOC728755			2.26814	2.20009	1.86218	1.87028	1.91745	1.93136	2.02635	2.2525
2650	GCNT1	glucosaminyl (N-acetyl) transferase 1, core 2	GO:0000139: Golgi membrane, GO:0003829: beta-1,3-galactosyl-O-glycosyl-glycoprotein beta-1,6-N-acetylglucosaminyltransferase activity, GO:0006493: protein O-linked glycosylation, GO:0016021: integral to membrane, GO:0016266: O-glycan processing, GO:0043687: post-translational protein modification, GO:0044267: cellular protein metabolic process	00512: Mucin type O-Glycan biosynthesis, 01100: Metabolic pathways	6.31897	6.38462	5.96365	5.95216	5.97529	6.14289	6.33218	6.23773
2200	FBN1	fibrillin 1	GO:0001501: skeletal system development, GO:0001527: microfibril, GO:0005201: extracellular matrix structural constituent, GO:0005509: calcium ion binding, GO:0005515: protein binding, GO:0005576: extracellular region, GO:0005578: proteinaceous extracellular matrix, GO:0005604: basement membrane, GO:0005615: extracellular space, GO:0007507: heart development, GO:0031012: extracellular matrix, GO:…		8.12396	8.10861	7.95848	7.94942	7.93298	8.00492	8.10637	8.03646
5783	PTPN13	protein tyrosine phosphatase, non-receptor type 13 (APO-1/CD95 (Fas)-associated phosphatase)	GO:0004725: protein tyrosine phosphatase activity, GO:0005515: protein binding, GO:0005634: nucleus, GO:0005737: cytoplasm, GO:0005856: cytoskeleton, GO:0005886: plasma membrane, GO:0006470: protein dephosphorylation, GO:0030027: lamellipodium, GO:0035335: peptidyl-tyrosine dephosphorylation, GO:0035335: peptidyl-tyrosine dephosphorylation, GO:0043005: neuron projection, GO:0044297: cell body		6.53033	6.50885	6.10752	6.08914	6.38334	6.40275	6.25883	6.20188
125488	TTC39C	tetratricopeptide repeat domain 39C			6.45855	6.49857	6.04907	6.00073	6.3092	6.32874	6.16807	6.10901
255919	CNEP1R1	CTD nuclear envelope phosphatase 1 regulatory subunit 1	GO:0005515: protein binding, GO:0005737: cytoplasm, GO:0006629: lipid metabolic process, GO:0010867: positive regulation of triglyceride biosynthetic process, GO:0016021: integral to membrane, GO:0031965: nuclear membrane, GO:0034504: protein localization to nucleus, GO:0035307: positive regulation of protein dephosphorylation, GO:0071595: Nem1-Spo7 phosphatase complex		7.0031	7.08506	6.26516	6.28133	6.85166	6.69579	6.50307	6.43703
3212	HOXB2	homeobox B2	GO:0002011: morphogenesis of an epithelial sheet, GO:0003700: sequence-specific DNA binding transcription factor activity, GO:0005634: nucleus, GO:0006351: transcription, DNA-dependent, GO:0007275: multicellular organismal development, GO:0008015: blood circulation, GO:0009952: anterior/posterior pattern specification, GO:0009953: dorsal/ventral pattern formation, GO:0021569: rhombomere 3 develop…		8.36602	8.43651	7.68131	7.71024	8.314	8.30932	8.04288	7.90955
747	DAGLA	diacylglycerol lipase, alpha	GO:0004806: triglyceride lipase activity, GO:0005886: plasma membrane, GO:0007596: blood coagulation, GO:0008219: cell death, GO:0016021: integral to membrane, GO:0016042: lipid catabolic process, GO:0030168: platelet activation, GO:0046872: metal ion binding		6.58869	6.55533	5.756	5.73862	6.4836	6.45816	6.02478	6.01215
27043	PELP1	proline, glutamate and leucine rich protein 1	GO:0005515: protein binding, GO:0005737: cytoplasm, GO:0006351: transcription, DNA-dependent, GO:0071339: MLL1 complex		7.3877	7.33826	6.50113	6.54709	7.17268	7.22926	6.82401	6.84246
85369	FAM40A	family with sequence similarity 40, member A	GO:0003674: molecular_function, GO:0005515: protein binding, GO:0005634: nucleus, GO:0005737: cytoplasm, GO:0022604: regulation of cell morphogenesis, GO:0030866: cortical actin cytoskeleton organization		7.53335	7.54199	6.29664	6.38072	7.53214	7.51138	6.60304	6.57563
8200	GDF5	growth differentiation factor 5	GO:0005125: cytokine activity, GO:0005615: extracellular space, GO:0007179: transforming growth factor beta receptor signaling pathway, GO:0007267: cell-cell signaling, GO:0008083: growth factor activity, GO:0030326: embryonic limb morphogenesis, GO:0032332: positive regulation of chondrocyte differentiation, GO:0035136: forelimb morphogenesis, GO:0035137: hindlimb morphogenesis, GO:0040007: grow…	04060: Cytokine-cytokine receptor interaction, 04350: TGF-beta signaling pathway	9.03561	8.95813	6.48994	6.39577	8.84948	8.93804	6.83488	6.95775
55357	TBC1D2	TBC1 domain family, member 2	GO:0005097: Rab GTPase activator activity, GO:0005543: phospholipid binding, GO:0005634: nucleus, GO:0005737: cytoplasm, GO:0016023: cytoplasmic membrane-bounded vesicle, GO:0030054: cell junction, GO:0031410: cytoplasmic vesicle, GO:0032851: positive regulation of Rab GTPase activity, GO:0045296: cadherin binding		8.74471	8.7561	7.91827	7.91063	8.67397	8.64188	8.05851	8.03972
29915	HCFC2	host cell factor C2	GO:0000122: negative regulation of transcription from RNA polymerase II promoter, GO:0003713: transcription coactivator activity, GO:0005634: nucleus, GO:0005737: cytoplasm, GO:0006357: regulation of transcription from RNA polymerase II promoter, GO:0016032: viral reproduction		6.95417	6.91738	6.2057	6.15021	6.83228	6.69503	6.40721	6.4765
54796	BNC2	basonuclin 2	GO:0003677: DNA binding, GO:0005634: nucleus, GO:0005737: cytoplasm, GO:0005886: plasma membrane, GO:0006351: transcription, DNA-dependent, GO:0006355: regulation of transcription, DNA-dependent, GO:0008270: zinc ion binding		7.42114	7.46476	6.65045	6.67088	7.22148	7.26376	6.96611	7.08396
8314	BAP1	BRCA1 associated protein-1 (ubiquitin carboxy-terminal hydrolase)	GO:0001558: regulation of cell growth, GO:0003682: chromatin binding, GO:0004221: ubiquitin thiolesterase activity, GO:0004843: ubiquitin-specific protease activity, GO:0005515: protein binding, GO:0005634: nucleus, GO:0005730: nucleolus, GO:0005737: cytoplasm, GO:0006464: cellular protein modification process, GO:0006511: ubiquitin-dependent protein catabolic process, GO:0008233: peptidase activ…		8.2323	8.14416	7.71046	7.73071	8.12241	8.06856	7.93478	7.98206
3912	LAMB1	laminin, beta 1	GO:0005178: integrin binding, GO:0005198: structural molecule activity, GO:0005201: extracellular matrix structural constituent, GO:0005576: extracellular region, GO:0005604: basement membrane, GO:0005604: basement membrane, GO:0005606: laminin-1 complex, GO:0005606: laminin-1 complex, GO:0005606: laminin-1 complex, GO:0005607: laminin-2 complex, GO:0005607: laminin-2 complex, GO:0005615: extrace…	04510: Focal adhesion, 04512: ECM-receptor interaction, 05145: Toxoplasmosis, 05146: Amoebiasis, 05200: Pathways in cancer, 05222: Small cell lung cancer	8.95379	8.89498	8.67917	8.63355	8.81596	8.81311	8.78302	8.74245
57805	KIAA1967	KIAA1967	GO:0000993: RNA polymerase II core binding, GO:0004857: enzyme inhibitor activity, GO:0004857: enzyme inhibitor activity, GO:0005515: protein binding, GO:0005634: nucleus, GO:0005737: cytoplasm, GO:0005759: mitochondrial matrix, GO:0006397: mRNA processing, GO:0006915: apoptotic process, GO:0008380: RNA splicing, GO:0019899: enzyme binding, GO:0030530: heterogeneous nuclear ribonucleoprotein comp…		7.22834	7.21412	6.63879	6.53857	7.01688	7.0581	6.90139	6.83789
89796	NAV1	neuron navigator 1	GO:0000166: nucleotide binding, GO:0001578: microtubule bundle formation, GO:0001764: neuron migration, GO:0005737: cytoplasm, GO:0005874: microtubule, GO:0017111: nucleoside-triphosphatase activity		7.95275	7.90795	7.2924	7.20683	7.68144	7.66194	7.58332	7.65589
26960	NBEA	neurobeachin	GO:0005802: trans-Golgi network, GO:0005829: cytosol, GO:0005886: plasma membrane, GO:0012505: endomembrane system		5.58059	5.53643	5.30339	5.26832	5.43224	5.43884	5.38935	5.40887
65003	MRPL11	mitochondrial ribosomal protein L11	GO:0003735: structural constituent of ribosome, GO:0005761: mitochondrial ribosome, GO:0006412: translation		8.00598	7.92137	7.57627	7.50045	7.82663	7.77332	7.71477	7.71804
9632	SEC24C	SEC24 family, member C (S. cerevisiae)	GO:0000139: Golgi membrane, GO:0002474: antigen processing and presentation of peptide antigen via MHC class I, GO:0003674: molecular_function, GO:0005515: protein binding, GO:0005634: nucleus, GO:0005789: endoplasmic reticulum membrane, GO:0005829: cytosol, GO:0006886: intracellular protein transport, GO:0006888: ER to Golgi vesicle-mediated transport, GO:0006888: ER to Golgi vesicle-mediated tr…	04141: Protein processing in endoplasmic reticulum	7.86654	7.8106	7.50437	7.48216	7.75193	7.69255	7.61765	7.63393
25906	ANAPC15	anaphase promoting complex subunit 15	GO:0005622: intracellular, GO:0005680: anaphase-promoting complex, GO:0007067: mitosis, GO:0051301: cell division, GO:0090266: regulation of mitotic cell cycle spindle assembly checkpoint		9.95659	9.92043	9.61971	9.62376	9.83315	9.77026	9.74192	9.77474
5205	ATP8B1	ATPase, aminophospholipid transporter, class I, type 8B, member 1	GO:0000287: magnesium ion binding, GO:0004012: phospholipid-translocating ATPase activity, GO:0005515: protein binding, GO:0005524: ATP binding, GO:0005783: endoplasmic reticulum, GO:0005886: plasma membrane, GO:0005887: integral to plasma membrane, GO:0006200: ATP catabolic process, GO:0006812: cation transport, GO:0008206: bile acid metabolic process, GO:0015662: ATPase activity, coupled to tra…		8.9458	9.00474	8.43925	8.39293	8.68263	8.70154	8.34056	8.32268
5347	PLK1	polo-like kinase 1	GO:0000086: G2/M transition of mitotic cell cycle, GO:0000086: G2/M transition of mitotic cell cycle, GO:0000087: M phase of mitotic cell cycle, GO:0000088: mitotic prophase, GO:0000122: negative regulation of transcription from RNA polymerase II promoter, GO:0000236: mitotic prometaphase, GO:0000278: mitotic cell cycle, GO:0000776: kinetochore, GO:0000910: cytokinesis, GO:0000910: cytokinesis, G…	04110: Cell cycle, 04114: Oocyte meiosis, 04914: Progesterone-mediated oocyte maturation	9.93526	9.94545	8.71037	8.63564	9.3034	9.27015	8.54378	8.53783
7026	NR2F2	nuclear receptor subfamily 2, group F, member 2	GO:0000122: negative regulation of transcription from RNA polymerase II promoter, GO:0001764: neuron migration, GO:0001937: negative regulation of endothelial cell proliferation, GO:0001972: retinoic acid binding, GO:0003700: sequence-specific DNA binding transcription factor activity, GO:0003700: sequence-specific DNA binding transcription factor activity, GO:0003707: steroid hormone receptor ac…		6.78385	6.77875	5.12233	5.19357	5.98488	5.95925	4.96538	5.08411
9824	ARHGAP11A	Rho GTPase activating protein 11A	GO:0005096: GTPase activator activity, GO:0005829: cytosol, GO:0007264: small GTPase mediated signal transduction, GO:0051056: regulation of small GTPase mediated signal transduction		8.90338	8.90886	7.43812	7.52126	8.2098	8.11225	7.22772	7.24721
8436	SDPR	serum deprivation response	GO:0001786: phosphatidylserine binding, GO:0005515: protein binding, GO:0005543: phospholipid binding, GO:0005737: cytoplasm, GO:0005794: Golgi apparatus, GO:0005829: cytosol, GO:0005886: plasma membrane, GO:0005901: caveola		7.94816	7.96331	6.80124	6.80853	7.54822	7.49265	6.54465	6.51987
7153	TOP2A	topoisomerase (DNA) II alpha 170kDa	GO:0000228: nuclear chromosome, GO:0000278: mitotic cell cycle, GO:0000712: resolution of meiotic recombination intermediates, GO:0000795: synaptonemal complex, GO:0000819: sister chromatid segregation, GO:0003677: DNA binding, GO:0003682: chromatin binding, GO:0003918: DNA topoisomerase (ATP-hydrolyzing) activity, GO:0005080: protein kinase C binding, GO:0005515: protein binding, GO:0005524: ATP…		10.1907	10.2793	8.50097	8.54951	9.59727	9.65278	8.34768	8.34397
9793	CKAP5	cytoskeleton associated protein 5	GO:0000086: G2/M transition of mitotic cell cycle, GO:0000087: M phase of mitotic cell cycle, GO:0000236: mitotic prometaphase, GO:0000278: mitotic cell cycle, GO:0000922: spindle pole, GO:0000930: gamma-tubulin complex, GO:0005515: protein binding, GO:0005813: centrosome, GO:0005829: cytosol, GO:0007051: spindle organization, GO:0015630: microtubule cytoskeleton, GO:0030951: establishment or mai…		9.61424	9.6406	9.05068	9.0228	9.23103	9.26485	8.92729	8.89821
4001	LMNB1	lamin B1	GO:0005198: structural molecule activity, GO:0005635: nuclear envelope, GO:0005637: nuclear inner membrane, GO:0005638: lamin filament, GO:0005654: nucleoplasm, GO:0006915: apoptotic process, GO:0006921: cellular component disassembly involved in apoptotic process, GO:0016363: nuclear matrix, GO:0043274: phospholipase binding		8.1884	8.20107	6.75424	6.7904	7.26431	7.25801	6.30621	6.24052
55706	TMEM48	transmembrane protein 48	GO:0005643: nuclear pore, GO:0015031: protein transport, GO:0017056: structural constituent of nuclear pore, GO:0031081: nuclear pore distribution, GO:0031965: nuclear membrane, GO:0051028: mRNA transport, GO:0051292: nuclear pore complex assembly	03013: RNA transport	9.02245	9.11324	8.35614	8.31685	8.60839	8.6014	8.11949	8.09956
9928	KIF14	kinesin family member 14	GO:0003777: microtubule motor activity, GO:0005515: protein binding, GO:0005524: ATP binding, GO:0005634: nucleus, GO:0005737: cytoplasm, GO:0005819: spindle, GO:0005874: microtubule, GO:0007018: microtubule-based movement		8.41629	8.44491	7.50141	7.4239	7.72996	7.67444	7.05411	7.06078
890	CCNA2	cyclin A2	GO:0000079: regulation of cyclin-dependent protein kinase activity, GO:0000086: G2/M transition of mitotic cell cycle, GO:0000278: mitotic cell cycle, GO:0001939: female pronucleus, GO:0001940: male pronucleus, GO:0005515: protein binding, GO:0005634: nucleus, GO:0005654: nucleoplasm, GO:0005737: cytoplasm, GO:0007067: mitosis, GO:0007095: mitotic cell cycle G2/M transition DNA damage checkpoint,…	04110: Cell cycle, 04914: Progesterone-mediated oocyte maturation	9.09712	9.30297	7.88879	7.93864	8.26612	8.23532	7.47148	7.50045
1108	CHD4	chromodomain helicase DNA binding protein 4	GO:0003677: DNA binding, GO:0004003: ATP-dependent DNA helicase activity, GO:0005515: protein binding, GO:0005524: ATP binding, GO:0005634: nucleus, GO:0005737: cytoplasm, GO:0005813: centrosome, GO:0006351: transcription, DNA-dependent, GO:0006357: regulation of transcription from RNA polymerase II promoter, GO:0008134: transcription factor binding, GO:0008270: zinc ion binding, GO:0016568: chro…		8.90186	8.8376	8.27505	8.31597	8.55227	8.53205	8.26861	8.27103
9862	MED24	mediator complex subunit 24	GO:0001104: RNA polymerase II transcription cofactor activity, GO:0003712: transcription cofactor activity, GO:0004402: histone acetyltransferase activity, GO:0004872: receptor activity, GO:0005634: nucleus, GO:0005654: nucleoplasm, GO:0006355: regulation of transcription, DNA-dependent, GO:0006367: transcription initiation from RNA polymerase II promoter, GO:0006367: transcription initiation fro…		8.13005	8.16026	7.6258	7.70057	7.8323	7.80651	7.65091	7.6053
899	CCNF	cyclin F	GO:0000320: re-entry into mitotic cell cycle, GO:0001890: placenta development, GO:0005515: protein binding, GO:0005634: nucleus, GO:0005814: centriole, GO:0007067: mitosis, GO:0010826: negative regulation of centrosome duplication, GO:0016567: protein ubiquitination, GO:0019005: SCF ubiquitin ligase complex, GO:0031146: SCF-dependent proteasomal ubiquitin-dependent protein catabolic process, GO:…		7.59013	7.41942	6.26002	6.17154	6.72234	6.54105	6.30304	6.08613
6821	SUOX	sulfite oxidase	GO:0000096: sulfur amino acid metabolic process, GO:0000098: sulfur amino acid catabolic process, GO:0005758: mitochondrial intermembrane space, GO:0005759: mitochondrial matrix, GO:0005829: cytosol, GO:0007584: response to nutrient, GO:0008482: sulfite oxidase activity, GO:0009055: electron carrier activity, GO:0020037: heme binding, GO:0030151: molybdenum ion binding, GO:0034641: cellular nitro…	00920: Sulfur metabolism	5.75777	5.78691	5.37616	5.32985	5.49977	5.48835	5.32935	5.3927
23424	TDRD7	tudor domain containing 7	GO:0002089: lens morphogenesis in camera-type eye, GO:0003729: mRNA binding, GO:0005515: protein binding, GO:0005737: cytoplasm, GO:0005759: mitochondrial matrix, GO:0007281: germ cell development, GO:0007283: spermatogenesis, GO:0010608: posttranscriptional regulation of gene expression, GO:0033391: chromatoid body, GO:0035770: ribonucleoprotein granule, GO:0043186: P granule, GO:0047485: protei…		6.48238	6.5113	5.96458	5.88624	6.17555	6.20488	5.94664	5.89971
66008	TRAK2	trafficking protein, kinesin binding 2	GO:0005102: receptor binding, GO:0005515: protein binding, GO:0005634: nucleus, GO:0005737: cytoplasm, GO:0005739: mitochondrion, GO:0005769: early endosome, GO:0005886: plasma membrane, GO:0006357: regulation of transcription from RNA polymerase II promoter, GO:0006493: protein O-linked glycosylation, GO:0006605: protein targeting, GO:0019899: enzyme binding, GO:0050811: GABA receptor binding		8.17524	8.19708	7.82254	7.73535	7.99629	7.96284	7.88176	7.83706
51479	ANKFY1	ankyrin repeat and FYVE domain containing 1	GO:0010008: endosome membrane, GO:0043231: intracellular membrane-bounded organelle, GO:0046872: metal ion binding		7.91887	7.87999	7.38069	7.32447	7.68516	7.6778	7.43078	7.41928
23338	PHF15	PHD finger protein 15	GO:0000123: histone acetyltransferase complex, GO:0008270: zinc ion binding, GO:0043966: histone H3 acetylation, GO:0043981: histone H4-K5 acetylation, GO:0043982: histone H4-K8 acetylation, GO:0043983: histone H4-K12 acetylation		7.72408	7.82611	7.18671	7.1393	7.53115	7.47612	7.22682	7.26883
221393	GPR115	G protein-coupled receptor 115	GO:0004930: G-protein coupled receptor activity, GO:0005886: plasma membrane, GO:0007186: G-protein coupled receptor signaling pathway, GO:0007218: neuropeptide signaling pathway, GO:0016021: integral to membrane		4.15332	3.9324	3.09192	3.05007	3.46519	3.59587	3.26386	3.17434
10953	TOMM34	translocase of outer mitochondrial membrane 34	GO:0005741: mitochondrial outer membrane, GO:0006626: protein targeting to mitochondrion, GO:0016021: integral to membrane, GO:0031072: heat shock protein binding		9.00428	8.98528	8.54422	8.46523	8.68657	8.7563	8.5506	8.59448
6502	SKP2	S-phase kinase-associated protein 2, E3 ubiquitin protein ligase	GO:0000080: G1 phase of mitotic cell cycle, GO:0000082: G1/S transition of mitotic cell cycle, GO:0000084: S phase of mitotic cell cycle, GO:0000086: G2/M transition of mitotic cell cycle, GO:0000209: protein polyubiquitination, GO:0000278: mitotic cell cycle, GO:0004842: ubiquitin-protein ligase activity, GO:0005515: protein binding, GO:0005654: nucleoplasm, GO:0005829: cytosol, GO:0008283: cell…	04110: Cell cycle, 04120: Ubiquitin mediated proteolysis, 05200: Pathways in cancer, 05222: Small cell lung cancer	9.15077	9.1059	8.46563	8.52815	8.82296	8.80067	8.55159	8.65399
9343	EFTUD2	elongation factor Tu GTP binding domain containing 2	GO:0000398: nuclear mRNA splicing, via spliceosome, GO:0000398: nuclear mRNA splicing, via spliceosome, GO:0003924: GTPase activity, GO:0005515: protein binding, GO:0005525: GTP binding, GO:0005634: nucleus, GO:0005654: nucleoplasm, GO:0005681: spliceosomal complex, GO:0005737: cytoplasm, GO:0006184: GTP catabolic process, GO:0006397: mRNA processing, GO:0008380: RNA splicing, GO:0010467: gene ex…	03040: Spliceosome	9.73128	9.72728	9.56859	9.59243	9.67174	9.66641	9.59704	9.61863
